# Supplementary material for: Integrated in silico Analyses of Regulatory and Metabolic Networks of Synechococcus sp. PCC 7002 Reveal Relationships between Gene Centrality and Essentiality
Source: MDPI journal article supplement (doi:10.3390/life5021127), 2015-03-27
Supplement: s1 [file s1]

## Supplementary Materials

**Table S1.** Summary of growth conditions with a short name given for each condition along with specifics of the growth conditions under analysis. RNA-seq data from several of these data sets has already been published and deposited into online databases with the references shown in the far right column.

| #  | Conditions          | Specifics                                                                                                                                                                                                                                                                                             | Reference  |
|----|---------------------|-------------------------------------------------------------------------------------------------------------------------------------------------------------------------------------------------------------------------------------------------------------------------------------------------------|------------|
| 1  | C-lim               | Synechococcus 7002 30 °C in continuous culture at a dilution rate of 0.1 hr <sup>-1</sup> . A+ media was used with 7.7 mM NaHCO <sub>3</sub> , 17 mM NH <sub>4</sub> Cl and an incident light of 180 μE m <sup>-2</sup> s <sup>-1</sup> and was sparged with N <sub>2</sub> at a rate of 0.75 L/min.  | This study |
| 2  | N-lim (ammonia)     | Synechococcus 7002 30 °C in continuous culture at a dilution rate of 0.1 hr <sup>-1</sup> . A+ media was used with 7.7 mM NaHCO <sub>3</sub> , 0.9 mM NH <sub>4</sub> Cl and an incident light of 180 μE m <sup>-2</sup> s <sup>-1</sup> and was sparged with N <sub>2</sub> at a rate of 0.75 L/min. | This study |
| 3  | L-lim               | Synechococcus 7002 30 °C in continuous culture at a dilution rate of 0.1 hr <sup>-1</sup> . A+ media was used with 7.7 mM NaHCO <sub>3</sub> , 17 mM NH <sub>4</sub> Cl and an incident light of 140 μE m <sup>-2</sup> s <sup>-1</sup> and was sparged with N <sub>2</sub> at a rate of 0.75 L/min.  | This study |
| 4  | C-lim, HiLi/HiO2    | Synechococcus 7002 OG1+LK1, high light / high O <sub>2</sub> chemostat                                                                                                                                                                                                                                | [1]        |
| 5  | L-lim, LoLi/HiO2    | Synechococcus 7002 OG1+LK1, low light / high O <sub>2</sub> chemostat                                                                                                                                                                                                                                 | [1]        |
| 6  | L-lim, LoLi/LoO2    | Synechococcus 7002 OG1+LK1, low light / low O <sub>2</sub> chemostat                                                                                                                                                                                                                                  | [1]        |
| 7  | C-lim, HiLi/LoO2    | Synechococcus 7002 OG1+LK1, high light / low O <sub>2</sub> chemostat                                                                                                                                                                                                                                 | [1]        |
| 8  | Shew Cocul, HiLi    | Synechococcus 7002 30 °C in continuous culture chemostat with Shewanella W3-18. A+ media was used with 8 mM NaHCO <sub>3</sub> and sparged with 2% CO <sub>2</sub> in air with 1720 μmol photons m <sup>-2</sup> s <sup>-1</sup>                                                                      | [1]        |
| 9  | Shew Cocul, LoLi    | Synechococcus 7002 30 °C in continuous culture chemostat with Shewanella W3-18. A+ media was used with 8 mM NaHCO <sub>3</sub> and sparged with 2% CO <sub>2</sub> in air with 640 μmol photons m <sup>-2</sup> s <sup>-1</sup>                                                                       | [1]        |
| 10 | Shew Cocul, lactate | Synechococcus 7002 30 °C in continuous culture chemostat with Shewanella W3-18. A+ media was used with 5mM lactate and sparged with 2% CO <sub>2</sub> in air with 1720 μmol photons m <sup>-2</sup> s <sup>-1</sup>                                                                                  | [1]        |
| 11 | 33umol photons      | Synechococcus 7002 30 °C in continuous culture chemostat with A+ media and 17 mM NH <sub>4</sub> Cl and irradiance of 33 μmol photons m <sup>-2</sup> s <sup>-1</sup>                                                                                                                                 | This study |
| 12 | 98umol photons      | Synechococcus 7002 30 °C in continuous culture chemostat with A+ media and 17 mM NH <sub>4</sub> Cl and irradiance of 98 μmol photons m <sup>-2</sup> s <sup>-1</sup>                                                                                                                                 | This study |
| 13 | 164umol photons     | Synechococcus 7002 30 °C in continuous culture chemostat with A+ media and 17 mM NH <sub>4</sub> Cl and irradiance of 164 μmol photons m <sup>-2</sup> s <sup>-1</sup>                                                                                                                                | This study |
| 14 | 395umol photons     | Synechococcus 7002 30 °C in continuous culture chemostat with A+ media and 17 mM NH <sub>4</sub> Cl and irradiance of 395 μmol photons m <sup>-2</sup> s <sup>-1</sup>                                                                                                                                | This study |

Table S1. Cont.

| #  | Conditions                        | Specifics                                                                                                                                                                                                                                                        | Reference  |
|----|-----------------------------------|------------------------------------------------------------------------------------------------------------------------------------------------------------------------------------------------------------------------------------------------------------------|------------|
| 15 | 610umol photons                   | Synechococcus 7002 30 °C in continuous culture chemostat with A+ media and 17 mM NH <sub>4</sub> Cl and irradiance of 610 $\mu\text{mol photons m}^{-2} \text{s}^{-1}$                                                                                           | This study |
| 16 | 760umol photons                   | Synechococcus 7002 30 °C in continuous culture chemostat with A+ media and 17 mM NH <sub>4</sub> Cl and irradiance of 760 $\mu\text{mol photons m}^{-2} \text{s}^{-1}$                                                                                           | This study |
| 17 | Adapted Syn 7002 HiO <sub>2</sub> | Synechococcus 7002, high light/high O <sub>2</sub> adapted EH1—16.5% dissolved O <sub>2</sub>                                                                                                                                                                    | This study |
| 18 | Adapted Syn 7002 LoO <sub>2</sub> | Synechococcus 7002, high light/high O <sub>2</sub> adapted EH1—7.1% dissolved O <sub>2</sub>                                                                                                                                                                     | This study |
| 19 | Standard                          | 38 °C with continous illumination of 250 $\mu\text{E m}^{-2} \text{s}^{-1}$ sparged with 1% CO <sub>2</sub> in air in 25 mL medium A with 1 mg/mL NaNO <sub>3</sub> (medium A+). Innoculated at O.D. <sub>730</sub> 0.1, harvested at O.D. <sub>730</sub> of 0.7 | [2]        |
| 20 | High Salt                         | Standard conditions but with 1.5 M NaCl and 40 mM KCL                                                                                                                                                                                                            | [2]        |
| 21 | Low Salt                          | Standard conditions but with 3 mM NaCl and 0.08 mM KCL                                                                                                                                                                                                           | [2]        |
| 22 | Mixo Growth                       | Standard growth conditions but with 10 mM glycerol                                                                                                                                                                                                               | [2]        |
| 23 | Ox Stress                         | 30 minutes under standard conditions with 5uM methyl viologen                                                                                                                                                                                                    | [2]        |
| 24 | 42 Deg                            | Standard conditions but at 42 °C for 1 h                                                                                                                                                                                                                         | [2]        |
| 25 | 30 Deg                            | Standard growth but at 30 °C                                                                                                                                                                                                                                     | [2]        |
| 26 | 22 Deg                            | Standard growth but at 22 °C                                                                                                                                                                                                                                     | [2]        |
| 27 | Urea                              | Standard growth in medium A (not +) with 25 mM HEPES (no Tris-HCL), 1 $\mu\text{M NiSO}_4$ and 10 mM urea, grown to final OD of 0.7 before harvest                                                                                                               | [3]        |
| 28 | Ammonia                           | Standard growth in medium A (not +) with 25 mM HEPES (no Tris-HCL), 1 $\mu\text{M NiSO}_4$ and 10 mM NH <sub>4</sub> Cl, grown to final OD of 0.7 before harvest                                                                                                 | [3]        |
| 29 | Nitrate                           | Standard growth in medium A (not +) with 25 mM HEPES (no Tris-HCL), 1 $\mu\text{M NiSO}_4$ and 12 mM NaNO <sub>3</sub> , grown to final OD of 0.7 before harvest                                                                                                 | [3]        |
| 30 | Fe-lim                            | At standard conditions and an OD of 0.35 a final concentration of 720 $\mu\text{M}$ deferoxamine mesylate B was added to cultures and harvest took place at an OD of 0.7                                                                                         | [3]        |
| 31 | P-lim                             | Growth under standard conditions until OD reached 0.6–0.7, cells were then centrifuged and washed twice in medium A+ with no phosphate and allowed to grow from OD of 0.25 to 0.7 before harvest                                                                 | [3]        |

Table S1. Cont.

| #  | Conditions          | Specifics                                                                                                                                                                                                                          | Reference |
|----|---------------------|------------------------------------------------------------------------------------------------------------------------------------------------------------------------------------------------------------------------------------|-----------|
| 32 | S-lim               | Growth under standard conditions until OD reached 0.6–0.7, cells were then centrifuged and washed twice in medium A+ with MgCl <sub>2</sub> instead of MgSO <sub>4</sub> and allowed to grow from OD of 0.35 to 0.7 before harvest | [3]       |
| 33 | N-lim (nitrate)     | Growth under standard conditions until OD reached 0.6–0.7, cells were then centrifuged and washed twice in medium A+ with no nitrate and allowed to grow from OD of 0.35 to 0.7 before harvest                                     | [3]       |
| 34 | Low CO <sub>2</sub> | Standard conditions but sparged with air (0.035% CO <sub>2</sub> )                                                                                                                                                                 | [3]       |
| 35 | Low O <sub>2</sub>  | Standard conditions but sparged with 1% CO <sub>2</sub> in N <sub>2</sub>                                                                                                                                                          | [3]       |
| 36 | O.D. 0.4            | Starting OD of 0.05–0.1 under standard conditions and harvested with OD reached 0.4                                                                                                                                                | [4]       |
| 37 | O.D. 1.0            | Starting OD of 0.05–0.1 under standard conditions and harvested with OD reached 1.0                                                                                                                                                | [4]       |
| 38 | O.D. 3.0            | Starting OD of 0.05–0.1 under standard conditions and harvested with OD reached 3.0                                                                                                                                                | [4]       |
| 39 | O.D. 5.0            | Starting OD of 0.05–0.1 under standard conditions and harvested with OD reached 5.0                                                                                                                                                | [4]       |
| 40 | High Light          | Growth under standard conditions to OD of 0.7 and 1 hour of 900 $\mu\text{mol photons m}^{-2} \text{s}^{-1}$                                                                                                                       | [4]       |
| 41 | Dark Anoxic         | Growth under standard conditions to OD of 0.7 and 1 hour of dark and sparging with 1% CO <sub>2</sub> in N <sub>2</sub>                                                                                                            | [4]       |
| 42 | Dark Oxidic         | Growth under standard conditions to OD of 0.7 and 1 hour of dark                                                                                                                                                                   | [4]       |

**Table S2.** Classification of 42 growth conditions into different sets based on the similarity of *in silico* flux distributions as identified by principle component analysis. No substantial differences in flux distribution were observed between Sets 3a and 3b, and between Sets 4a and 4b. Full description of each growth condition is available in Table S1.

| Set  | Growth conditions                                                                                                                                                                                                                                                                                                                            |
|------|----------------------------------------------------------------------------------------------------------------------------------------------------------------------------------------------------------------------------------------------------------------------------------------------------------------------------------------------|
| 1    | N-lim (ammonia)                                                                                                                                                                                                                                                                                                                              |
| 2    | N-lim (nitrate)                                                                                                                                                                                                                                                                                                                              |
| (3a) | C-lim; L-lim; C-lim, HiLi/HiO2; L-lim, LoLi/LoO2; L-lim, LoLi/HiO2; C-lim, HiLi/LoO2; Shew Cocul, HiLi; Shew Cocul, LoLi; Shew Cocul, lactate; 33 $\mu$ mol photons; 98 $\mu$ mol photons; 164 $\mu$ mol photons; 395 $\mu$ mol photons; 610 $\mu$ mol photons; 760 $\mu$ mol photons; Adapted Syn 7002 HiO2; Adapted Syn 7002 LoO2; Ammonia |
| (3b) | Urea                                                                                                                                                                                                                                                                                                                                         |
| (4a) | Standard; High Salt; Low Salt; Ox Stress; 42 Deg; 30 Deg; 22 Deg; Nitrate; Fe-lim; P-lim; S-lim; Low CO <sub>2</sub> ; Low O <sub>2</sub> ; O.D. 0.4; O.D. 1.0; O.D. 3.0; O.D. 5.0; High Light                                                                                                                                               |
| (4b) | Low CO <sub>2</sub> ; Dark Anoxic; Dark Oxidic                                                                                                                                                                                                                                                                                               |
| 5    | Mix Growth                                                                                                                                                                                                                                                                                                                                   |

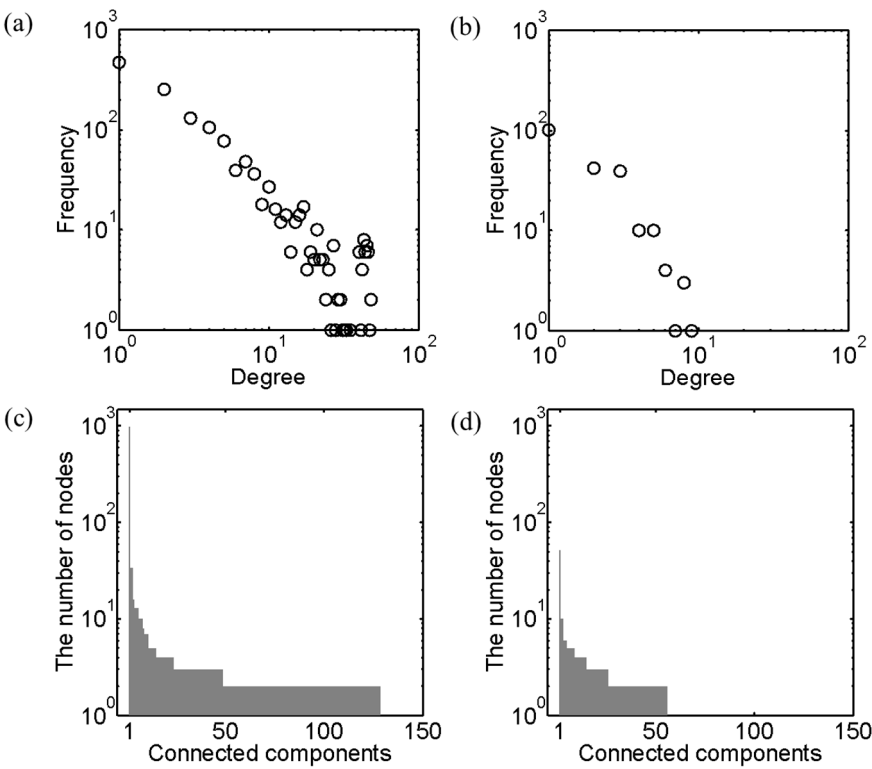

**Figure S1.** Degree (a,b) and component size (c,d) distributions in two GCNs constructed from the whole 3236 genes (GCN<sub>1</sub>) and 706 metabolic genes (GCN<sub>2</sub>).

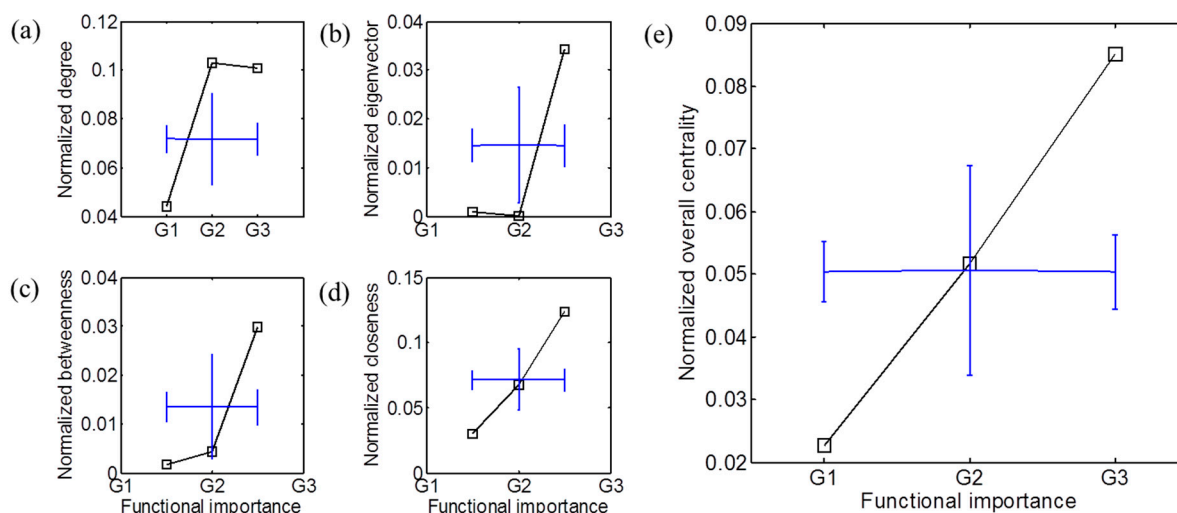

**Figure S2.** Comparison of the centrality values between specifically defined groups (Group 1 to Group 3) (black) and randomly chosen groups (blue). The vertical bars along the blue lines represent standard deviation of the average centrality values among 5000 randomly selected groups.

## References

1. Beliaev, A.S.; Romine, M.F.; Serres, M.; Bernstein, H.C.; Linggi, B.E.; Markillie, L.M.; Isern, N.G.; Chrisler, W.B.; Kucek, L.A.; Hill, E.A.; *et al.* Inference of interactions in cyanobacterial-heterotrophic co-cultures via transcriptome sequencing. *ISME J.* **2014**, *8*, 2243–2255.
2. Ludwig, M.; Bryant, D.A. *Synechococcus* sp. strain PCC 7002 transcriptome: Acclimation to temperature, salinity, oxidative stress, and mixotrophic growth conditions. *Front Microbiol.* **2012**, *3*, doi:10.3389/fmicb.2012.00354.
3. Ludwig, M.; Bryant, D.A. Acclimation of the global transcriptome of the cyanobacterium *synechococcus* sp strain PCC 7002 to nutrient limitations and different nitrogen sources. *Front Microbiol.* **2012**, *3*, doi:10.3389/fmicb.2012.00145.
4. Ludwig, M.; Bryant, D.A. Transcription profiling of the model cyanobacterium *synechococcus* sp. strain PCC 7002 by next-gen (SOLiD™) sequencing of cDNA. *Front Microbiol.* **2011**, *2*, doi:10.3389/fmicb.2011.00041.
