# Supplementary material for: Integrated in silico Analyses of Regulatory and Metabolic Networks of Synechococcus sp. PCC 7002 Reveal Relationships between Gene Centrality and Essentiality
Source: Life (Basel). 2015 Mar 27;5(2):1127–40. doi: 10.3390/life5021127 (PMC4500133; doi:10.3390/life5021127)
Supplement: Supplementary File 1 [file life-05-01127-s001.zip › Supplementary datasets.xlsx]

## Sheet: Dataset S1
Flux distributions estimated by E-Fmin
Rxn name	Rxn description	Formula	Set 1	Set 2	Set 3a	Set 3b	Set 4a	Set 4b	Set 5
r_2OGDC	2 oxoglutarate decarboxylase	m_akg[c] + m_h[c] -> m_co2[c] + m_sucsal[c]	0	0	0	0	0	0	0.0771781
r_4VCR	divinyl chlorophyllide a 8 vinyl reductase	m_dvpc[c] + m_h[c] + m_nadph[c] -> m_mvpc[c] + m_nadp[c]	0.000974	0.000974	0.000974	0.000974	0.000974	0.000974	0.000974
r_5M23DPP	5 Methylthio 2 3 dioxopentyl phosphate phosphohydrolase	m_5m23dp[c] + m_h2o[c] <=> m_12dh5mp[c] + 2 m_h[c] + m_pi[c]	0	0	0	0	0	0	0
r_AACPAT	Acetyl CoA acyl carrier protein S acetyltransferase	m_accoa[c] + m_acp[c] -> m_acacp[c] + m_coa[c]	0	0	0	0	0	0	0
r_ACBIPGT	Adenosyl cobainamide GTP transferase	m_adcobap[c] + m_gtp[c] + m_h[c] -> m_adgcoba[c] + m_ppi[c]	0	0	0	0	0	0	0
r_ACCOAC	acetyl CoA carboxylase	m_accoa[c] + m_atp[c] + m_hco3[c] -> m_adp[c] + m_h[c] + m_malcoa[c] + m_pi[c]	0.114972	0.114972	0.114972	0.114972	0.114972	0.114972	0.114972
r_ACGK	acetylglutamate kinase	m_acglu[c] + m_atp[c] -> m_acg5p[c] + m_adp[c]	0.027878	0.027878	0.027878	0.027878	0.027878	0.027878	0.027878
r_ACGS	N acetylglutamate synthase	m_accoa[c] + m_glu_l[c] -> m_acglu[c] + m_coa[c] + m_h[c]	0	0	0	0	0	0	0
r_ACHBS	2 aceto 2 hydroxybutanoate synthase	m_2obut[c] + m_h[c] + m_pyr[c] -> m_2ahbut[c] + m_co2[c]	0.033284	0.033284	0.033284	0.033284	0.033284	0.033284	0.033284
r_ACLS	acetolactate synthase Also catalyzes ACHBS	m_h[c] + 2 m_pyr[c] -> m_alac_s[c] + m_co2[c]	0.094512	0.094512	0.094512	0.094512	0.094512	0.094512	0.094512
r_ACMAT1	Acyl acyl carrier protein malonyl acyl carrier protein C acyltransferase decarboxylating	m_acacp[c] + m_h[c] + m_malacp[c] -> m_acp[c] + m_actacp[c] + m_co2[c]	0	0	0	0	0	0	0
r_ACONT	aconitase	m_cit[c] <=> m_icit[c]	0.136516	0.136516	0.136516	0.136516	0.136516	0.136516	0.213694
r_ACOTA	acetylornithine transaminase	m_acorn[c] + m_akg[c] <=> m_acg5sa[c] + m_glu_l[c]	-0.027878	-0.027878	-0.027878	-0.027878	-0.027878	-0.027878	-0.027878
r_ACS	acetyl CoA synthetase	m_ac[c] + m_atp[c] + m_coa[c] -> m_accoa[c] + m_amp[c] + m_ppi[c]	0	0	0	0	0	0	0
r_ACS3	acetyl CoA synthetase ADP forming	m_ac[c] + m_atp[c] + m_coa[c] <=> m_accoa[c] + m_adp[c] + m_pi[c]	0.016602	0.016602	0.016602	0.016602	0.016602	0.016602	0.016602
r_ACT6	acetate transport in out via proton symport	m_ac[e] + m_h[e] <=> m_ac[c] + m_h[c]	0	0	0	0	0	0	0
r_ADCL	4 aminobenzoate synthase	m_4adcho[c] -> m_4abz[c] + m_h[c] + m_pyr[c]	0	0	0	0	0	0	0
r_ADCOBAK	Adenosyl cobinamide kinase	m_adcoba[c] + m_atp[c] -> m_adcobap[c] + m_adp[c] + m_h[c]	0	0	0	0	0	0	0
r_ADCOBHEXS	adenosylcobyric acid synthase	m_adcobdam[c] + 4 m_atp[c] + 4 m_gln_l[c] + 4 m_h2o[c] -> m_adcobhex[c] + 4 m_adp[c] + 4 m_glu_l[c] + 4 m_h[c] + 4 m_pi[c]	0	0	0	0	0	0	0
r_ADCS	4 amino 4 deoxychorismate synthase	m_chor[c] + m_gln_l[c] -> m_4adcho[c] + m_glu_l[c]	0	0	0	0	0	0	0
r_ADK1	adenylate kinase	m_amp[c] + m_atp[c] <=> 2 m_adp[c]	0.65313	0.65313	0.65313	0.65313	0.65313	0.65313	0.65313
r_ADNCYC	Adenylate cyclase	m_atp[c] -> m_camp[c] + m_ppi[c]	0	0	0	0	0	0	0
r_ADNK1	adenosine kinase	m_adn[c] + m_atp[c] -> m_adp[c] + m_amp[c]	0.000974	0.000974	0.000974	0.000974	0.000974	0.000974	0.000974
r_ADPRDP	ADPribose diphosphatase	m_adprib[c] + m_h2o[c] -> m_amp[c] + 2 m_h[c] + m_r5p[c]	0	0	0	0	0	0	0
r_ADPT	adenine phosphoribosyltransferase	m_ade[c] + m_prpp[c] <=> m_amp[c] + m_ppi[c]	0	0	0	0	0	0	0
r_ADSK	adenylyl sulfate kinase	m_aps[c] + m_atp[c] -> m_adp[c] + m_h[c] + m_paps[c]	0.0174054	0.0174054	0.0174054	0.0174054	0.0174054	0.0174054	0.0174054
r_ADSL1R	adenylsuccinate lyase	m_dcamp[c] <=> m_amp[c] + m_fum[c]	0.016514	0.016514	0.016514	0.016514	0.016514	0.016514	0.016514
r_ADSL2R	adenylosuccinate lyase	m_25aics[c] <=> m_aicar[c] + m_fum[c]	0.009673	0.009673	0.009673	0.009673	0.009673	0.009673	0.009673
r_ADSS	adenylosuccinate synthetase	m_asp_l[c] + m_gtp[c] + m_imp[c] -> m_dcamp[c] + m_gdp[c] + 2 m_h[c] + m_pi[c]	0.016514	0.016514	0.016514	0.016514	0.016514	0.016514	0.016514
r_AGDC	N acetylglucosamine 6 phosphate deacetylase	m_acgam6p[c] + m_h2o[c] -> m_ac[c] + m_gam6p[c]	0	0	0	0	0	0	0
r_AGMT	agmatinase	m_agm[c] + m_h2o[c] -> m_ptrc[c] + m_urea[c]	0	0	0	0	0	0	0
r_AGPAT_SYN	1 acylglycerol 3 phosphate O acyltransferase Synechococcus	0.02 m_1ag3p_syn[c] + 0.07 m_9hdeacp[c] + 0.01 m_linlnacp[c] + 0.01 m_ocdacp[c] + 0.18 m_ocdcyaacp[c] + 0.17 m_octeacp[c] + 0.56 m_palmacp[c] -> m_acp[c] + 0.02 m_pa_syn[c]	0.0078	0.0078	0.0078	0.0078	0.0078	0.0078	0.0078
r_AGPR	N acetyl g glutamyl phosphate reductase	m_acg5sa[c] + m_nadp[c] + m_pi[c] <=> m_acg5p[c] + m_h[c] + m_nadph[c]	-0.027878	-0.027878	-0.027878	-0.027878	-0.027878	-0.027878	-0.027878
r_AGT	alanine glyoxylate transaminase	m_ala_l[c] + m_glx[c] <=> m_gly[c] + m_pyr[c]	0.004636	0	0.004636	0.004636	0	0	0
r_AHCI	adenosylhomocysteinase	m_ahcys[c] + m_h2o[c] -> m_adn[c] + m_hcys_l[c]	0.000974	0.000974	0.000974	0.000974	0.000974	0.000974	0.000974
r_AHMMPS	4 amino 5 hydroxymethyl 2 methylpyrimidine synthetase	m_air[c] + m_h2o[c] -> m_4ahmmp[c] + m_gcald[c] + 0.5 m_o2[c] + m_pi[c]	0	0	0	0	0	0	0
r_AHSERL2	O acetylhomoserine thiol lyase	m_achms[c] + m_h2s[c] -> m_ac[c] + m_hcys_l[c]	0.010282	0.010282	0.010282	0.010282	0.010282	0.010282	0.010282
r_AICART	phosphoribosylaminoimidazolecarboxamide formyltransferase	m_10fthf[c] + m_aicar[c] <=> m_fprica[c] + m_thf[c]	0.020114	0.020114	0.020114	0.020114	0.020114	0.020114	0.020114
r_AIRC1	phosphoribosylaminoimidazole carboxylase ATP dependent	m_air[c] + m_atp[c] + m_co2[c] + m_h2o[c] -> m_5aizc[c] + m_adp[c] + 2 m_h[c] + m_pi[c]	0.009673	0.009673	0.009673	0.009673	0.009673	0.009673	0.009673
r_AKP1	alkaline phosphatase Dihydroneopterin	m_ahdt[c] + 3 m_h2o[c] -> m_dhnpt[c] + 2 m_h[c] + 3 m_pi[c]	0	0	0	0	0	0	0
r_ALAD_LR	L alanine dehydrogenase reversible	m_ala_l[c] + m_h2o[c] + m_nad[c] <=> m_h[c] + m_nadh[c] + m_nh4[c] + m_pyr[c]	-0.052177	-0.047541	-0.052177	-0.052177	-0.047541	-0.047541	-0.081355
r_ALALIG	D alanine D alanine ligase reversible	2 m_ala_d[c] + m_atp[c] <=> m_adp[c] + m_alaala[c] + m_h[c] + m_pi[c]	0	0	0	0	0	0	0
r_ALAR	alanine racemase	m_ala_l[c] <=> m_ala_d[c]	0	0	0	0	0	0	0
r_ALATRS	Alanyl tRNA synthetase	m_ala_l[c] + m_atp[c] + m_trnaala[c] -> m_alatrna[c] + m_amp[c] + m_ppi[c]	0.047541	0.047541	0.047541	0.047541	0.047541	0.047541	0.047541
r_ALA_LT6	L alanine transport in out via proton symport	m_ala_l[e] + m_h[e] <=> m_ala_l[c] + m_h[c]	0	0	0	0	0	0	0
r_ALCD19	alcohol dehydrogenase glycerol	m_glyald[c] + m_h[c] + m_nadh[c] <=> m_glyc[c] + m_nad[c]	0	0	0	0	0	0	0
r_ALCD2X	alcohol dehydrogenase ethanol NAD	m_etoh[c] + m_nad[c] <=> m_acald[c] + m_h[c] + m_nadh[c]	0	0	0	0	0	0	0
r_AMAA	N acetylmuramoyl L alanine amidase	m_acmama[c] + m_h2o[c] -> m_acmam[c] + m_ala_l[c]	0	0	0	0	0	0	0
r_AMANAPE	N acetylmannosamine 6 phoshpate epimerase	m_acmanap[c] -> m_acgam6p[c]	0	0	0	0	0	0	0
r_AMETDC	adenosylmethionine decarboxylase	m_amet[c] + m_h[c] <=> m_ametam[c] + m_co2[c]	0	0	0	0	0	0	0
r_ANPRT	anthranilate phosphoribosyltransferase	m_anth[c] + m_prpp[c] -> m_ppi[c] + m_pran[c]	0.007897	0.007897	0.007897	0.007897	0.007897	0.007897	0.007897
r_ANS1	anthranilate synthase	m_chor[c] + m_gln_l[c] -> m_anth[c] + m_glu_l[c] + m_h[c] + m_pyr[c]	0.007897	0.007897	0.007897	0.007897	0.007897	0.007897	0.007897
r_AOXS	8 amino 7 oxononanoate synthase	m_ala_l[c] + m_h[c] + m_pmcoa[c] <=> m_8aonn[c] + m_co2[c] + m_coa[c]	0	0	0	0	0	0	0
r_APRAUR	5 amino 6 5 phosphoribosylaminouracil reductase	m_5apru[c] + m_h[c] + m_nadph[c] -> m_5aprbu[c] + m_nadp[c]	0	0	0	0	0	0	0
r_ARD	acireductone dioxygenase Require Ni2	m_12dh5mp[c] + m_o2[c] <=> m_3mtpa[c] + m_co[c] + m_formate[c] + 2 m_h[c]	0	0	0	0	0	0	0
r_ARD1	acireductone dioxygenase Require Fe2	m_12dh5mp[c] + m_o2[c] <=> m_4mtoba[c] + m_formate[c] + 2 m_h[c]	0	0	0	0	0	0	0
r_ARGD	arginine deaminase	m_arg_l[c] + m_h2o[c] -> m_citr_l[c] + m_nh4[c]	0	0	0	0	0	0	0
r_ARGDC	arginine decarboxylase	m_arg_l[c] + m_h[c] -> m_agm[c] + m_co2[c]	0	0	0	0	0	0	0
r_ARGSL	argininosuccinate lyase	m_argsuc[c] <=> m_arg_l[c] + m_fum[c]	0.027878	0.027878	0.027878	0.027878	0.027878	0.027878	0.027878
r_ARGSS	argininosuccinate synthase	m_asp_l[c] + m_atp[c] + m_citr_l[c] -> m_amp[c] + m_argsuc[c] + m_h[c] + m_ppi[c]	0.027878	0.027878	0.027878	0.027878	0.027878	0.027878	0.027878
r_ARGTRS	Arginyl tRNA synthetase	m_arg_l[c] + m_atp[c] + m_trnaarg[c] -> m_amp[c] + m_argtrna[c] + m_ppi[c]	0.027878	0.027878	0.027878	0.027878	0.027878	0.027878	0.027878
r_ARSRD2	arsenate reductase glutaredoxin	m_arsna[c] + 2 m_gthrd[c] + 2 m_h[c] -> m_arsni2[c] + m_gthox[c] + m_h2o[c]	0	0	0	0	0	0	0
r_ARSTATPASE	Arsenite transporting ATPase	m_arsni2[c] + m_atp[c] + m_h2o[c] -> m_adp[c] + m_arsni2[e] + m_h[c] + m_pi[c]	0	0	0	0	0	0	0
r_ASAD	aspartate semialdehyde dehydrogenase	m_aspsa[c] + m_nadp[c] + m_pi[c] <=> m_4pasp[c] + m_h[c] + m_nadph[c]	-0.096407	-0.096407	-0.096407	-0.096407	-0.096407	-0.096407	-0.063123
r_ASNN	L asparaginase	m_asn_l[c] + m_h2o[c] -> m_asp_l[c] + m_nh4[c]	0	0	0	0	0	0	0
r_ASNTRS	Asparaginyl tRNA synthetase	m_asn_l[c] + m_atp[c] + m_trnaasn[c] -> m_amp[c] + m_asntrna[c] + m_ppi[c]	0	0	0	0	0	0	0
r_ASP1DC	aspartate 1 decarboxylase	m_asp_l[c] + m_h[c] -> m_ala_b[c] + m_co2[c]	0.000914	0.000914	0.000914	0.000914	0.000914	0.000914	0.000914
r_ASPADT	Asparaginyl tRNA synthase glutamine hydrolysing	m_asptrna[c] + m_atp[c] + m_gln_l[c] + m_h2o[c] -> m_adp[c] + m_asntrna[c] + m_glu_l[c] + m_h[c] + m_pi[c]	0.019822	0.019822	0.019822	0.019822	0.019822	0.019822	0.019822
r_ASPCT	aspartate carbamoyltransferase	m_asp_l[c] + m_cbp[c] -> m_cbasp[c] + m_h[c] + m_pi[c]	0.0072252	0.0072252	0.0072252	0.0072252	0.0072252	0.0072252	0.0072252
r_ASPK	aspartate kinase	m_asp_l[c] + m_atp[c] <=> m_4pasp[c] + m_adp[c]	0.096407	0.096407	0.096407	0.096407	0.096407	0.096407	0.063123
r_ASPO5	L aspartate oxidase	m_asp_l[c] + m_fum[c] -> m_h[c] + m_iasp[c] + m_succ[c]	0.001145	0.001145	0.001145	0.001145	0.001145	0.001145	0.001145
r_ASPO6	L aspartate oxidase	m_asp_l[c] + m_o2[c] -> m_h[c] + m_h2o2[c] + m_iasp[c]	0	0	0	0	0	0	0
r_ASPO7	L aspartate oxidase	m_asp_l[c] + m_h2o[c] + m_o2[c] -> m_h2o2[c] + m_nh4[c] + m_oaa[c]	0	0	0	0	0	0	0
r_ASPT	L aspartase	m_asp_l[c] -> m_fum[c] + m_nh4[c]	0	0	0	0	0	0	0
r_ASPTA1	aspartate transaminase	m_akg[c] + m_asp_l[c] <=> m_glu_l[c] + m_oaa[c]	-0.207032	-0.207032	-0.207032	-0.207032	-0.207032	-0.207032	-0.173748
r_ASPTRS	Aspartyl tRNA synthetase	m_asp_l[c] + m_atp[c] + m_trnaasp[c] -> m_amp[c] + m_asptrna[c] + m_ppi[c]	0.047276	0.047276	0.047276	0.047276	0.047276	0.047276	0.047276
r_ATPATF1	ATP adenylyltransferase	m_adp[c] + m_atp[c] + m_h[c] -> m_ap4a[c] + m_pi[c]	0	0	0	0	0	0	0
r_ATPATF4	APS ATP adenylyltransferase	m_aps[c] + m_atp[c] -> m_ap4a[c] + m_so4[c]	0	0	0	0	0	0	0
r_ATPM	ATP maintenance requirment	m_atp[c] + m_h2o[c] -> m_adp[c] + m_h[c] + m_pi[c]	0	1.1433	0	0	1.25568	0.498667	0
r_ATPPRT	ATP phosphoribosyltransferase	m_atp[c] + m_prpp[c] -> m_ppi[c] + m_prbatp[c]	0.010441	0.010441	0.010441	0.010441	0.010441	0.010441	0.010441
r_ATPS4R	ATP synthase fourteen protons for 3 ATP	m_adp[c] + 4 m_h[e] + m_pi[c] <=> m_atp[c] + 3 m_h[c] + m_h2o[c]	19.5931	22.2615	14.0069	14.4036	16.7877	16.7897	4.33717
r_BACCL	biotin acetyl CoA carboxylase ligase	m_atp[c] + m_btn[c] + m_h[c] -> m_btamp[c] + m_ppi[c]	0	0	0	0	0	0	0
r_BIOMASSSYN7002	Biomass equation for Synechococcus 7002	0.00249 m_accoa[c] + 0.00114 m_amp[c] + 0.00974 m_chla[c] + 0.00571 m_coa[c] + 0.00011 m_dna_syn[c] + 0.00156 m_lipid_syn[c] + 0.01061 m_nad[c] + 0.00034 m_nadh[c] + 1e-05 m_nadp[c] + 0.00049 m_nadph[c] + 0.0133 m_phycocyanobilin[c] + 0.00053 m_protein_syn[c] + 0.00139 m_rna_syn[c] + 0.00094 m_succoa[c] + 0.0102 m_udpg[c] ->	0.1	0.1	0.1	0.1	0.1	0.1	0.1
r_BLVDR	biliverdin reductase	m_biliverdin[c] + m_h[c] + m_nadph[c] -> m_bilirubin[c] + m_nadp[c]	0	0	0	0	0	0	0
r_BPNT	3 5 bisphosphate nucleotidase	m_h2o[c] + m_pap[c] -> m_amp[c] + m_pi[c]	0.0174054	0.0174054	0.0174054	0.0174054	0.0174054	0.0174054	0.0174054
r_BTMAT1	Butyryl acyl carrier protein malonyl CoA C acyltransferase	m_2beacp[c] + m_h[c] + m_nadph[c] -> m_butacp[c] + m_nadp[c]	0.0156	0.0156	0.0156	0.0156	0.0156	0.0156	0.0156
r_BTS2	biotin synthase ala L producing	m_cys_l[c] + m_dtbt[c] <=> m_ala_l[c] + m_btn[c] + 2 m_h[c]	0	0	0	0	0	0	0
r_CA2ABC1	calcium efflux via ABC system	m_atp[c] + m_ca2[c] + m_h2o[c] -> m_adp[c] + m_ca2[e] + m_h[c] + m_pi[c]	0	0	0	0	0	0	0
r_CAT	catalase	2 m_h2o2[c] -> 2 m_h2o[c] + m_o2[c]	0	0	0	0	0	0	0
r_CBPS	carbamoyl phosphate synthase glutamine hydrolysing	2 m_atp[c] + m_gln_l[c] + m_h2o[c] + m_hco3[c] -> 2 m_adp[c] + m_cbp[c] + m_glu_l[c] + 2 m_h[c] + m_pi[c]	0.0351032	0.0351032	0.0351032	0.0351032	0.0351032	0.0351032	0.0351032
r_CDGPT_SYN	CDPdiacylglycerol sn glycerol 3 phosphate 3 phosphatidyltransferase	0.01 m_cdpdag_syn[c] + m_glyc3p[c] -> m_cmp[c] + m_h[c] + 0.01 m_pglyp_syn[c]	0.0025896	0.0025896	0.0025896	0.0025896	0.0025896	0.0025896	0.0025896
r_CDPMEK	4 cytidine 5 diphospho 2 C methyl D erythritol kinase	m_4c2me[c] + m_atp[c] -> m_2p4c2me[c] + m_adp[c] + m_h[c]	0.003896	0.003896	0.003896	0.003896	0.003896	0.003896	0.003896
r_CELLSYN	Cellulose synthase	m_udpg[c] -> m_cell[c] + m_h[c] + m_udp[c]	0	0	0	0	0	0	0
r_CGPASE	Cyanophycinase	m_arg_l_asp_l2[c] + m_h2o[c] -> 2 m_arg_l_asp_l[c]	0	0	0	0	0	0	0
r_CHORM	chorismate mutase	m_chor[c] -> m_pphn[c]	0.0371	0.0371	0.0371	0.0371	0.0371	0.0371	0.0371
r_CHORS	chorismate synthase	m_3psme[c] -> m_chor[c] + m_pi[c]	0.044997	0.044997	0.044997	0.044997	0.044997	0.044997	0.044997
r_CHPS	chlorophyll synthase	m_clpyda[c] + m_h[c] + m_phdp[c] -> m_chla[c] + m_ppi[c]	0.000974	0.000974	0.000974	0.000974	0.000974	0.000974	0.000974
r_CICOHL	2 methylmaleate hydro lyase	m_cico[c] + m_h2o[c] <=> m_emma[c]	0	0	0	0	0	0	0.033284
r_CIMAHL	2 Methylmalate hydro lyase	m_cima[c] <=> m_cico[c] + m_h2o[c]	0	0	0	0	0	0	0.033284
r_CIMAS	citramalate synthase	m_accoa[c] + m_h2o[c] + m_pyr[c] -> m_cima[c] + m_coa[c] + m_h[c]	0	0	0	0	0	0	0.033284
r_CO2T	CO2 transport out via diffusion	m_co2[e] <=> m_co2[c]	5.34846	5.50317	3.58441	3.33783	3.73913	3.73913	-0.493621
r_COABC	Cobalt transport via ABC system	m_atp[c] + m_cobalt2[e] + m_h2o[c] -> m_adp[c] + m_cobalt2[c] + m_h[c] + m_pi[c]	0	0	0	0	0	0	0
r_COBALTT5	cobalt transport in out via permease no H	m_cobalt2[c] <=> m_cobalt2[e]	0	0	0	0	0	0	0
r_COBPS	cobalamin 5 phosphate synthase	m_adgcoba[c] + m_rdmbzi[c] -> m_cobamcoa[c] + m_gmp[c] + m_h[c]	0	0	0	0	0	0	0
r_COT	CO transport out via diffusion	m_co[e] <=> m_co[c]	-0.00133	-0.00133	-0.00133	-0.00133	-0.00133	-0.00133	-0.00133
r_COX_CYC	cytochrome c oxidase cytochrome c6	2 m_cyc6_rd[c] + 4 m_h[c] + 0.5 m_o2[c] -> 2 m_cyc6_ox[c] + m_h2o[c] + 2 m_h[e]	0.829624	0	0.682621	0.732203	0	0	0
r_CPC8MM	precorrin 8X methylmutase	m_copre8[c] <=> m_cobrnt[c]	0	0	0	0	0	0	0
r_CPHSARG	Cyanophycin synthase L arginine adding	m_arg_l[c] + m_arg_l_asp_l_asp_l[c] + m_atp[c] -> m_adp[c] + m_arg_l_asp_l2[c] + m_h[c] + m_pi[c]	0	0	0	0	0	0	0
r_CPHSASP	Cyanophycin synthase L aspartate adding	m_arg_l_asp_l[c] + m_asp_l[c] + m_atp[c] -> m_adp[c] + m_arg_l_asp_l_asp_l[c] + m_pi[c]	0	0	0	0	0	0	0
r_CPPPGO	coproporphyrinogen oxidase	m_cpppg3[c] + 2 m_h[c] + m_o2[c] -> 2 m_co2[c] + 2 m_h2o[c] + m_pppg9[c]	0.002304	0.002304	0.002304	0.002304	0.002304	0.002304	0.002304
r_CPPPGOAN	Oxygen Independent coproporphyrinogen III oxidase	2 m_amet[c] + m_cpppg3[c] + 4 m_fdxo_2_2[c] + 2 m_nadph[c] -> 2 m_co2[c] + 2 m_dad_5[c] + 4 m_fdxr_2_2[c] + 2 m_h[c] + 2 m_met_l[c] + 2 m_nadp[c] + m_pppg9[c]	0	0	0	0	0	0	0
r_CS	citrate synthase	m_accoa[c] + m_h2o[c] + m_oaa[c] -> m_cit[c] + m_coa[c] + m_h[c]	0.136516	0.136516	0.136516	0.136516	0.136516	0.136516	0.213694
r_CTPD	CTP deaminase	m_ctp[c] + m_h[c] + m_h2o[c] -> m_nh4[c] + m_utp[c]	0	0	0	0	0	0	0
r_CTPS1	CTP synthase NH3	m_atp[c] + m_nh4[c] + m_utp[c] -> m_adp[c] + m_ctp[c] + 2 m_h[c] + m_pi[c]	0.0023052	0	0.0023052	0.0023052	0	0	0
r_CTPS2	CTP synthase glutamine	m_atp[c] + m_gln_l[c] + m_h2o[c] + m_utp[c] -> m_adp[c] + m_ctp[c] + m_glu_l[c] + 2 m_h[c] + m_pi[c]	0	0.0023052	0	0	0.0023052	0.0023052	0.0023052
r_CUT1	Copper export via ATPase	m_atp[c] + m_cu2[c] + m_h2o[c] -> m_adp[c] + m_cu2[e] + m_h[c] + m_pi[c]	0	0	0	0	0	0	0
r_CYNS	Cyanate hydratase	m_cyn[c] + m_h[c] + m_hco3[c] <=> m_car[c] + m_co2[c]	0	0	0	0	0	0	0
r_CYSS	cysteine synthase	m_acser[c] + m_h2s[c] -> m_ac[c] + m_cys_l[c]	0.00632	0.00632	0.00632	0.00632	0.00632	0.00632	0.00632
r_CYSTRS	Cysteinyl tRNA synthetase	m_atp[c] + m_cys_l[c] + m_trnacys[c] -> m_amp[c] + m_cystrna[c] + m_ppi[c]	0.005406	0.005406	0.005406	0.005406	0.005406	0.005406	0.005406
r_CYTK1	cytidylate kinase CMP	m_atp[c] + m_cmp[c] <=> m_adp[c] + m_cdp[c]	0.0064856	0.0064856	0.0064856	0.0064856	0.0064856	0.0064856	0.0064856
r_CYTOM	cytosine 5 methyltransferase	m_amet[c] + m_csn[c] <=> m_5mcsn[c] + m_ahcys[c] + m_h[c]	0	0	0	0	0	0	0
r_DABA	diaminobutyrate decarboxylase	m_h[c] + m_l24dabut[c] <=> m_13dap[c] + m_co2[c]	0	0	0	0	0	0	0
r_DADK	deoxyadenylate kinase	m_atp[c] + m_damp[c] <=> m_adp[c] + m_dadp[c]	0	0	0	0	0	0	0
r_DADPEP	D ala D ala dipeptidase	m_alaala[c] + m_h2o[c] -> 2 m_ala_d[c]	0	0	0	0	0	0	0
r_DAGK_SYN	diacylglycerol kinase Synechococcus	0.02 m_12dgr_syn[c] + m_atp[c] -> m_adp[c] + m_h[c] + 0.02 m_pa_syn[c]	0	0	0	0	0	0	0
r_DAGPYP_SYN	diacylglycerol pyrophosphate phosphatase Synechococcus	m_h2o[c] + 0.02 m_pa_syn[c] -> 0.02 m_12dgr_syn[c] + m_pi[c]	0.0065052	0.0065052	0.0065052	0.0065052	0.0065052	0.0065052	0.0065052
r_DAHPS	3 deoxy D arabino heptulosonate 7 phosphate synthetase	m_e4p[c] + m_h2o[c] + m_pep[c] -> m_2dda7p[c] + m_pi[c]	0.044997	0.044997	0.044997	0.044997	0.044997	0.044997	0.044997
r_DAPAT	LL diaminopimelate aminotransferase	m_26dap_ll[c] + m_akg[c] <=> m_glu_l[c] + m_h[c] + m_h2o[c] + m_thdp[c]	-0.022101	-0.022101	-0.022101	-0.022101	-0.022101	-0.022101	-0.022101
r_DAPDC	diaminopimelate decarboxylase	m_26dap_m[c] + m_h[c] -> m_co2[c] + m_lys_l[c]	0.022101	0.022101	0.022101	0.022101	0.022101	0.022101	0.022101
r_DAPE	diaminopimelate epimerase	m_26dap_ll[c] <=> m_26dap_m[c]	0.022101	0.022101	0.022101	0.022101	0.022101	0.022101	0.022101
r_DB4PS	3 4 Dihydroxy 2 butanone 4 phosphate	m_ru5p_d[c] -> m_db4p[c] + m_formate[c] + m_h[c]	0	0	0	0	0	0	0
r_DBTS	dethiobiotin synthase	m_atp[c] + m_co2[c] + m_dann[c] -> m_adp[c] + m_dtbt[c] + 3 m_h[c] + m_pi[c]	0	0	0	0	0	0	0
r_DCTPD	dCTP deaminase	m_dctp[c] + m_h[c] + m_h2o[c] -> m_dutp[c] + m_nh4[c]	0	0	0	0	0	0	0
r_DDMAT5	Dodecanoyl acyl carrier protein malonyl CoA C acyltransferase	m_2tddacp[c] + m_h[c] + m_nadh[c] -> m_ddcaacp[c] + m_nad[c]	0.0156	0.0156	0.0156	0.0156	0.0156	0.0156	0.0156
r_DEMAT4	Decanoyl acyl carrier protein malonyl CoA C acyltransferase	m_2tdeacp[c] + m_h[c] + m_nadh[c] -> m_decacp[c] + m_nad[c]	0.0156	0.0156	0.0156	0.0156	0.0156	0.0156	0.0156
r_DESAT161_ACP	Palmitoyl ACP desaturase n C16 0ACP n C16 1ACP	m_h[c] + m_nadph[c] + m_o2[c] + m_palmacp[c] -> m_9hdeacp[c] + 2 m_h2o[c] + m_nadp[c]	0.001092	0.001092	0.001092	0.001092	0.001092	0.001092	0.001092
r_DESAT181_ACP	stearoyl ACP desaturase n C18 0ACP n C18 1ACP	m_h[c] + m_nadph[c] + m_o2[c] + m_ocdacp[c] -> 2 m_h2o[c] + m_nadp[c] + m_octeacp[c]	0.005616	0.005616	0.005616	0.005616	0.005616	0.005616	0.005616
r_DESAT182_ACP	omega 6 fatty acid desaturase	m_h[c] + m_nadph[c] + m_o2[c] + m_octeacp[c] -> 2 m_h2o[c] + m_nadp[c] + m_ocdcyaacp[c]	0.002964	0.002964	0.002964	0.002964	0.002964	0.002964	0.002964
r_DESAT183_ACP	omega 3 fatty acid desaturase	m_h[c] + m_nadph[c] + m_o2[c] + m_ocdcyaacp[c] -> 2 m_h2o[c] + m_linlnacp[c] + m_nadp[c]	0.000156	0.000156	0.000156	0.000156	0.000156	0.000156	0.000156
r_DGC	Diguanylate cyclase	2 m_gtp[c] -> m_cdigmp[c] + m_ppi[c]	0	0	0	0	0	0	0
r_DGDGST_SYN	digalactosyl diacylglycerol synthase	0.02 m_mgdg_syn[c] + m_udpgal[c] <=> 0.02 m_dgdg_syn[c] + m_h[c] + m_udp[c]	0.000975	0.000975	0.000975	0.000975	0.000975	0.000975	0.000975
r_DGK1	deoxyguanylate kinase dGMP ATP	m_atp[c] + m_dgmp[c] <=> m_adp[c] + m_dgdp[c]	0	0	0	0	0	0	0
r_DHAD1	dihydroxy acid dehydratase 2 3 dihydroxy 3 methylbutanoate	m_23dhmb[c] -> m_3mob[c] + m_h2o[c]	0.094512	0.094512	0.094512	0.094512	0.094512	0.094512	0.094512
r_DHAD2	Dihydroxy acid dehydratase 2 3 dihydroxy 3 methylpentanoate	m_23dhmp[c] -> m_3mop[c] + m_h2o[c]	0.033284	0.033284	0.033284	0.033284	0.033284	0.033284	0.033284
r_DHDPRY	dihydrodipicolinate reductase NADPH	m_23dhdp[c] + m_h[c] + m_nadph[c] -> m_nadp[c] + m_thdp[c]	0.022101	0.022101	0.022101	0.022101	0.022101	0.022101	0.022101
r_DHDPS	dihydrodipicolinate synthase	m_aspsa[c] + m_pyr[c] -> m_23dhdp[c] + m_h[c] + 2 m_h2o[c]	0.022101	0.022101	0.022101	0.022101	0.022101	0.022101	0.022101
r_DHFR	dihydrofolate reductase	m_dhf[c] + m_h[c] + m_nadph[c] <=> m_nadp[c] + m_thf[c]	0.000286	0.000286	0.000286	0.000286	0.000286	0.000286	0.000286
r_DHFS	dihydrofolate synthase	m_atp[c] + m_dhpt[c] + m_glu_l[c] -> m_adp[c] + m_dhf[c] + m_h[c] + m_pi[c]	0	0	0	0	0	0	0
r_DHNAPHT	1 4 dihydroxy 2 naphthoate phytyltransferase	m_dhna[c] + m_nad[c] + m_phdp[c] <=> m_co2[c] + m_dmphq[c] + m_nadh[c] + m_ppi[c]	0	0	0	0	0	0	0
r_DHNPA	dihydroneopterin aldolase	m_dhnpt[c] -> m_2ahhmp[c] + m_gcald[c]	0	0	0	0	0	0	0
r_DHORD_PQ9	dihydoorotic acid dehydrogenase plastoquinone9	m_dhor_s[c] + m_pq9[c] -> m_orot[c] + m_pq9h2[c]	0.0072252	0.0072252	0.0072252	0.0072252	0.0072252	0.0072252	0.0072252
r_DHORTS	dihydroorotase	m_dhor_s[c] + m_h2o[c] <=> m_cbasp[c] + m_h[c]	-0.0072252	-0.0072252	-0.0072252	-0.0072252	-0.0072252	-0.0072252	-0.0072252
r_DHPPDA2	diaminohydroxyphosphoribosylaminopyrimidine deaminase	m_25dhpp[c] + m_h[c] + m_h2o[c] -> m_5apru[c] + m_nh4[c]	0	0	0	0	0	0	0
r_DHPS1	dihydropteroate synthase	m_2ahhmp[c] + m_4abz[c] -> m_dhpt[c] + m_h2o[c]	0	0	0	0	0	0	0
r_DHPS3	dihydropteroate synthase	m_2ahhmd[c] + m_4abz[c] -> m_dhpt[c] + m_ppi[c]	0	0	0	0	0	0	0
r_DHQD1	3 dehydroquinate dehydratase	m_3dhq[c] <=> m_3dhsk[c] + m_h2o[c]	0.044997	0.044997	0.044997	0.044997	0.044997	0.044997	0.044997
r_DHQS	3 dehydroquinate synthase	m_2dda7p[c] -> m_3dhq[c] + m_pi[c]	0.044997	0.044997	0.044997	0.044997	0.044997	0.044997	0.044997
r_DMATT	dimethylallyltranstransferase	m_dmpp[c] + m_ipdp[c] -> m_grdp[c] + m_ppi[c]	0.000974	0.000974	0.000974	0.000974	0.000974	0.000974	0.000974
r_DMPHQM	demethylphylloquinone methyltransferase	m_amet[c] + m_dmphq[c] -> m_ahcys[c] + m_h[c] + m_phq[c]	0	0	0	0	0	0	0
r_DMPPS	1 hydroxy 2 methyl 2 E butenyl 4 diphosphate reductase dmpp	m_h[c] + m_h2mb4p[c] + m_nadh[c] -> m_dmpp[c] + m_h2o[c] + m_nad[c]	0	0	0	0	0	0.000974	0.000974
r_DMPPS1	1 hydroxy 2 methyl 2 E butenyl 4 diphosphate reductase dmpp NADP	m_h[c] + m_h2mb4p[c] + m_nadph[c] -> m_dmpp[c] + m_h2o[c] + m_nadp[c]	0.000974	0.000974	0.000974	0.000974	0.000974	0	0
r_DNASYN_SYN	DNA replication Synechococcus PCC 7002	100 m_atp[c] + 26 m_datp[c] + 24 m_dctp[c] + 24 m_dgtp[c] + 26 m_dttp[c] + 100 m_h2o[c] -> 100 m_adp[c] + m_dna_syn[c] + 100 m_h[c] + 100 m_pi[c] + 100 m_ppi[c]	1.1e-05	1.1e-05	1.1e-05	1.1e-05	1.1e-05	1.1e-05	1.1e-05
r_DNMPPA	Dihydroneopterin monophosphate dephosphorylase	m_dhpmp[c] + m_h2o[c] -> m_dhnpt[c] + m_pi[c]	0	0	0	0	0	0	0
r_DPCOAK	dephospho CoA kinase	m_atp[c] + m_dpcoa[c] -> m_adp[c] + m_coa[c] + m_h[c]	0.000914	0.000914	0.000914	0.000914	0.000914	0.000914	0.000914
r_DPR	2 dehydropantoate 2 reductase	m_2dhp[c] + m_h[c] + m_nadph[c] -> m_nadp[c] + m_pant_r[c]	0.000914	0.000914	0.000914	0.000914	0.000914	0.000914	0.000914
r_DRPA	deoxyribose phosphate aldolase	m_2dr5p[c] -> m_acald[c] + m_g3p[c]	0	0	0	0	0	0	0
r_DTCPHMT	delta tocopherol C methyltransferase	m_amet[c] + m_dtcph[c] -> m_ahcys[c] + m_btcph[c] + m_h[c]	0	0	0	0	0	0	0
r_DTMPK	dTMP kinase	m_atp[c] + m_dtmp[c] <=> m_adp[c] + m_dtdp[c]	0.000286	0.000286	0.000286	0.000286	0.000286	0.000286	0.000286
r_DUTPDP	dUTP diphosphatase	m_dutp[c] + m_h2o[c] -> m_dump[c] + m_h[c] + m_ppi[c]	0.000286	0.000286	0.000286	0.000286	0.000286	0.000286	0.000286
r_DXPRI	1 deoxy D xylulose 5 phosphate reductoisomerase	m_dxyl5p[c] + m_h[c] + m_nadph[c] <=> m_2me4p[c] + m_nadp[c]	0.003896	0.003896	0.003896	0.003896	0.003896	0.003896	0.003896
r_DXPS	1 deoxy D xylulose 5 phosphate synthase	m_g3p[c] + m_h[c] + m_pyr[c] -> m_co2[c] + m_dxyl5p[c]	0.003896	0.003896	0.003896	0.003896	0.003896	0.003896	0.003896
r_D_LACT2	D lactate transport	m_h[e] + m_lac_d[e] <=> m_h[c] + m_lac_d[c]	0	0	0	0	0	0	0
r_EDA	2 dehydro 3 deoxy phosphogluconate aldolase	m_2ddg6p[c] -> m_g3p[c] + m_pyr[c]	0	0	0	0	0	0	0
r_EMMD	erythro methyl malate dehydrogenase	m_emma[c] + m_nad[c] -> m_2obut[c] + m_co2[c] + m_nadh[c]	0	0	0	0	0	0	0.033284
r_ENO	enolase	m_2pg[c] <=> m_h2o[c] + m_pep[c]	0.994641	0.994641	0.994641	0.994641	0.994641	0.994641	1.1051
r_EPPP	exopolyphosphatase	2 m_h2o[c] + m_pppi[c] -> 2 m_h[c] + 3 m_pi[c]	0	0	0	0	0	0.758964	0
r_EX_AC_E	acetate exchange	m_ac[e] <=>	0	0	0	0	0	0	0
r_EX_ALA_L_E	L alanine	m_ala_l[e] <=>	0	0	0	0	0	0	0
r_EX_ARSNI2_E	arsenite exchange	m_arsni2[e] <=>	0	0	0	0	0	0	0
r_EX_CA2_E	calcium exchange	m_ca2[e] <=>	0	0	0	0	0	0	0
r_EX_CO2_E	co2 exchange	m_co2[e] <=>	-5.34846	-5.50317	-3.58441	-3.33783	-3.73913	-3.73913	0.493621
r_EX_COBALT2_E	cobalt exchange	m_cobalt2[e] <=>	0	0	0	0	0	0	0
r_EX_CO_E	CO exchange	m_co[e] <=>	0.00133	0.00133	0.00133	0.00133	0.00133	0.00133	0.00133
r_EX_CU2_E	Copper exchange	m_cu2[e] <=>	0	0	0	0	0	0	0
r_EX_FE2_E	iron II exchange	m_fe2[e] <=>	0	0	0	0	0	0	0
r_EX_FE3_E	iron exchange	m_fe3[e] <=>	0	0	0	0	0	0	0
r_EX_FOR_E	formate exchange	m_for[e] <=>	0	0.004636	0	0	0.004636	0.004636	0.004636
r_EX_GLN_L_E	glutamine exchange	m_gln_l[e] <=>	0	0	0	0	0	0	0
r_EX_GLYC_E	glycerol exchange	m_glyc[e] <=>	0	0	0	0	0	0	-1.41092
r_EX_H2O_E	water exchange	m_h2o[e] <=>	-3.04357	-3.9916	-1.57354	-1.72361	-2.52157	-2.52157	1.71118
r_EX_H2_E	h2 exchange	m_h2[e] <=>	0	0	0	0	0	0	0
r_EX_HCO3_E	carbonate exchange	m_hco3[e] <=>	-0.150075	0	-0.150075	0	0	0	0
r_EX_H_E	proton exchange	m_h[e] <=>	0.596865	-0.835061	0.596865	-0.443038	-0.835061	-0.835061	-2.24598
r_EX_ILE_L_E	isoleucine exchange	m_ile_l[e] <=>	0	0	0	0	0	0	0
r_EX_K_E	potassium exchange	m_k[e] <=>	0	0	0	0	0	0	0
r_EX_LAC_D_E	D lactate exchange	m_lac_d[e] <=>	0	0	0	0	0	0	0
r_EX_LEU_L_E	leucine exchange	m_leu_l[e] <=>	0	0	0	0	0	0	0
r_EX_MALTHX_E	maltohexaose exchange	m_malthx[e] <=>	0	0	0	0	0	0	0
r_EX_MALTPT_E	maltopentaose exchange	m_maltpt[e] <=>	0	0	0	0	0	0	0
r_EX_MALTTR_E	maltotriose exchange	m_malttr[e] <=>	0	0	0	0	0	0	0
r_EX_MALTTTR_E	maltotetraose exchange	m_maltttr[e] <=>	0	0	0	0	0	0	0
r_EX_MALT_E	maltose exchange	m_malt[e] <=>	0	0	0	0	0	0	0
r_EX_MG2_E	magnesium exchange	m_mg2[e] <=>	-0.000974	-0.000974	-0.000974	-0.000974	-0.000974	-0.000974	-0.000974
r_EX_MN2_E	manganese exchange	m_mn2[e] <=>	0	0	0	0	0	0	0
r_EX_MOBD_E	molybdate exchange	m_mobd[e] <=>	0	0	0	0	0	0	0
r_EX_NA1_E	sodium exchange	m_na1[e] <=>	0	0	0	0	0	0	0
r_EX_NH4_E	ammonia exchange	m_nh4[e] <=>	-0.793319	0	-0.793319	0	0	0	0
r_EX_NO2_E	nitrite exchange	m_no2[e] <=>	0	0	0	0	0	0	0
r_EX_NO3_E	nitrate exchange	m_no3[e] <=>	0	-0.793319	0	0	-0.793319	-0.793319	-0.793319
r_EX_O2_E	oxygen exchange	m_o2[e] <=>	5.73669	7.32564	3.97264	3.97264	5.5616	5.5616	1.32885
r_EX_PHOTONPSII_E	PSII photon exchange	m_photon_psii[e] <=>	-24.7145	-29.3926	-17.3644	-17.4635	-22.3364	-22.3364	-5.40541
r_EX_PHOTONPSI_E	PSI photon exchange	m_photon_psi[e] <=>	-23.897	-29.4091	-16.8408	-16.8408	-22.3529	-22.3529	-5.57631
r_EX_PI_E	phosphate exchange	m_pi[e] <=>	-0.0235308	-0.0235308	-0.0235308	-0.0235308	-0.0235308	-0.0235308	-0.0235308
r_EX_PTRC_E	putrescine exchange	m_ptrc[e] <=>	0	0	0	0	0	0	0
r_EX_SO4_E	sulfate exchange	m_so4[e] <=>	-0.0174054	-0.0174054	-0.0174054	-0.0174054	-0.0174054	-0.0174054	-0.0174054
r_EX_SPMD_E	spermidine exchange	m_spmd[e] <=>	0	0	0	0	0	0	0
r_EX_SUCC_E	Succinate exchange	m_succ[e] <=>	0	0	0	0	0	0	0
r_EX_UREA_E	urea exchange	m_urea[e] <=>	0	0	0	-0.396659	0	0	0
r_EX_VAL_L_E	valine exchange	m_val_l[e] <=>	0	0	0	0	0	0	0
r_EX_ZN2_E	Zinc exchange	m_zn2[e] <=>	0	0	0	0	0	0	0
r_FBA	fructose bisphosphate aldolase	m_fdp[c] <=> m_dhap[c] + m_g3p[c]	-2.39318	-2.39318	-1.51115	-1.51115	-1.51115	-1.51115	-0.210701
r_FBA2	D Fructose 1 phosphate D glyceraldehyde 3 phosphate lyase	m_f1p[c] <=> m_dhap[c] + m_glyald[c]	0	0	0	0	0	0	0
r_FBA3	Sedoheptulose 1 7 bisphosphate D glyceraldehyde 3 phosphate lyase	m_s17bp[c] <=> m_dhap[c] + m_e4p[c]	-1.96881	-1.96881	-1.3808	-1.3808	-1.3808	-1.3808	-0.0803429
r_FBP	fructose bisphosphatase	m_fdp[c] + m_h2o[c] -> m_f6p[c] + m_pi[c]	2.39318	2.39318	1.51115	1.51115	1.51115	1.51115	0.210701
r_FCLT	Heme B synthesis reaction	m_fe2[c] + m_ppp9[c] -> m_h[c] + m_pheme[c]	0.00133	0.00133	0.00133	0.00133	0.00133	0.00133	0.00133
r_FDIPDPFT	Farnesyl diphosphate Isopentenyl diphosphate farnesyl transferase	m_frdp[c] + m_ipdp[c] -> m_ppi[c] + m_tcggrpp[c]	0	0	0	0	0	0	0
r_FDNOR	ferredoxin NADP reductase	2 m_fdxr_2_2[c] + m_h[c] + m_nadp[c] -> 2 m_fdxo_2_2[c] + m_nadph[c]	11.896	10.8207	8.36795	8.36795	7.29264	7.29264	0
r_FDPQ	Cyclic reaction ferredoxin plastoquinol	2 m_fdxr_2_2[c] + 2 m_h[c] + m_pq9[c] -> 2 m_fdxo_2_2[c] + m_pq9h2[c]	0	0	0	0	0	0	0
r_FDSULR	ferredoxin sulfite reductase	6 m_fdxr_2_2[c] + 7 m_h[c] + m_so3[c] -> 6 m_fdxo_2_2[c] + 3 m_h2o[c] + m_h2s[c]	0.016602	0.016602	0.016602	0.016602	0.016602	0.016602	0.016602
r_FE2T	iron II transport	m_fe2[e] <=> m_fe2[c]	0	0	0	0	0	0	0
r_FE3ABC	iron III transport via ABC system	m_atp[c] + m_fe3[e] + m_h2o[c] -> m_adp[c] + m_fe3[c] + m_h[c] + m_pi[c]	0	0	0	0	0	0	0
r_FE3T4	iron III transport	m_fe3[e] -> m_fe3[c]	0	0	0	0	0	0	0
r_FMETDF	formylmethionine deformylase	m_fmet[c] + m_h2o[c] -> m_formate[c] + m_met_l[c]	0	0	0	0	0	0	0
r_FMETTRS	Methionyl tRNA formyltransferase	m_10fthf[c] + m_mettrna[c] <=> m_fmettrna[c] + m_thf[c]	0	0	0	0	0	0	0
r_FMNAT	FMN adenylyltransferase	m_atp[c] + m_fmn[c] + m_h[c] -> m_fad[c] + m_ppi[c]	0	0	0	0	0	0	0
r_FORT	formate transport via diffusion	m_for[e] <=> m_formate[c]	0	-0.004636	0	0	-0.004636	-0.004636	-0.004636
r_FOS	4 hydroxyphenylpyruvate 5 amino 6 D ribitylaminouracil 4 hydroxybenzyltransferase	m_34hpp[c] + m_4r5au[c] + 2 m_amet[c] + m_h2o[c] -> m_78d8h5drib[c] + 2 m_dad_5[c] + m_h[c] + 2 m_met_l[c] + m_nh4[c] + m_oxa[c]	0	0	0	0	0	0	0
r_FRTT	farnesyltranstransferase	m_frdp[c] + m_ipdp[c] -> m_ggdp[c] + m_ppi[c]	0.000974	0.000974	0.000974	0.000974	0.000974	0.000974	0.000974
r_FRUK	fructokinase	m_atp[c] + m_fru[c] -> m_adp[c] + m_f6p[c] + m_h[c]	0	0	0	0	0	0	0
r_FTHFCL	5 formyltetrahydrofolate cyclo ligase	m_5fothf[c] + m_atp[c] -> m_adp[c] + m_methf[c] + m_pi[c]	0	0	0	0	0	0	0
r_FTHFD	formyltetrahydrofolate deformylase	m_10fthf[c] + m_h2o[c] -> m_formate[c] + m_h[c] + m_thf[c]	0	0.004636	0	0	0.004636	0.004636	0.004636
r_FUMH	fumarase	m_fum[c] + m_h2o[c] <=> m_mal_l[c]	0.053971	0.053971	0.053971	0.053971	0.053971	0.053971	0.131149
r_G1PACTR	glucosamine 1 phosphate N acetyltransferase	m_accoa[c] + m_gam1p[c] <=> m_acgam1p[c] + m_coa[c] + m_h[c]	0	0	0	0	0	0	0
r_G1SAT	glutamate 1 semialdehyde aminotransferase	m_glu1sa[c] <=> m_5aop[c]	0.018432	0.018432	0.018432	0.018432	0.018432	0.018432	0.018432
r_G3PD2	glycerol 3 phosphate dehydrogenase NADP	m_glyc3p[c] + m_nadp[c] <=> m_dhap[c] + m_h[c] + m_nadph[c]	-0.0103896	-0.0103896	-0.0103896	-0.0103896	-0.0103896	-0.0103896	-0.0103896
r_G3PD_PQ	glycerol 3 phosphate dehydrogenase plastoquinone 9	m_glyc3p[c] + m_pq9[c] -> m_dhap[c] + m_pq9h2[c]	0	0	0	0	0	0	0
r_G3POA_SYN	glycerol 3 phosphate O acyltransferase Synechococcus	0.07 m_9hdeacp[c] + m_glyc3p[c] + 0.01 m_linlnacp[c] + 0.01 m_ocdacp[c] + 0.18 m_ocdcyaacp[c] + 0.17 m_octeacp[c] + 0.56 m_palmacp[c] -> 0.02 m_1ag3p_syn[c] + m_acp[c]	0.0078	0.0078	0.0078	0.0078	0.0078	0.0078	0.0078
r_G5SADS	L glutamate 5 semialdehyde dehydratase spontaneous	m_glu5sa[c] <=> m_1pyr5c[c] + m_h[c] + m_h2o[c]	0.027136	0.027136	0.027136	0.027136	0.027136	0.027136	0.027136
r_G5SD	glutamate 5 semialdehyde dehydrogenase	m_glu5p[c] + m_h[c] + m_nadph[c] -> m_glu5sa[c] + m_nadp[c] + m_pi[c]	0.027136	0.027136	0.027136	0.027136	0.027136	0.027136	0.027136
r_G6PDHY	glucose 6 phosphate dehydrogenase	m_g6p[c] + m_nadp[c] <=> m_6pgl[c] + m_h[c] + m_nadph[c]	0	0	0	0	0	0	0
r_GALU	UTP glucose 1 phosphate uridylyltransferase	m_g1p[c] + m_h[c] + m_utp[c] <=> m_ppi[c] + m_udpg[c]	0.0085002	0.0085002	0.0085002	0.0085002	0.0085002	0.0085002	0.0085002
r_GAPD	glyceraldehyde 3 phosphate dehydrogenase NAD	m_g3p[c] + m_nad[c] + m_pi[c] <=> m_13dpg[c] + m_h[c] + m_nadh[c]	0	-0.36325	0	0	0	0	0.695954
r_GAPD_NADP	glyceraldehyde 3 phosphate dehydrogenase NADP phosphorylating	m_13dpg[c] + m_h[c] + m_nadph[c] -> m_g3p[c] + m_nadp[c] + m_pi[c]	10.7453	10.3821	7.21723	7.21723	7.21723	7.21723	0
r_GARFT	phosphoribosylglycinamide formyltransferase	m_10fthf[c] + m_gar[c] <=> m_fgam[c] + m_h[c] + m_thf[c]	0.009673	0.009673	0.009673	0.009673	0.009673	0.009673	0.009673
r_GBEZY	1 4 alpha glucan branching enzyme	m_14glun[c] -> m_glycogen[c]	0.370868	0.370868	0.076861	0.076861	0.076861	0.076861	0.076861
r_GCALDD	Glycolaldehyde dehydrogenase	m_gcald[c] + m_h2o[c] + m_nad[c] -> m_glyclt[c] + 2 m_h[c] + m_nadh[c]	0	0	0	0	0	0	0
r_GDAGEPM_SYN	Glucosyl diacylglycerol epimerization	0.02 m_glcdg_syn[c] <=> 0.02 m_mgdg_syn[c]	0.0057018	0.0057018	0.0057018	0.0057018	0.0057018	0.0057018	0.0057018
r_GDMANE	GDP 4 dehydro 6 deoxy D mannose epimerase	m_gdpddm[c] <=> m_gdpofuc[c]	0	0	0	0	0	0	0
r_GDPMD	GDPmannose 4 6 dehydratase	m_gdpman[c] -> m_gdpddm[c] + m_h2o[c]	0	0	0	0	0	0	0
r_GF6PTA	glutamine fructose 6 phosphate transaminase	m_f6p[c] + m_gln_l[c] -> m_gam6p[c] + m_glu_l[c]	0	0	0	0	0	0	0
r_GHMT	glycine hydroxymethyltransferase	m_ser_l[c] + m_thf[c] <=> m_gly[c] + m_h2o[c] + m_mlthf[c]	0.042243	0.046879	0.042243	0.042243	0.046879	0.046879	0.046879
r_GK1	guanylate kinase GMP ATP	m_atp[c] + m_gmp[c] <=> m_adp[c] + m_gdp[c]	0.0036	0.0036	0.0036	0.0036	0.0036	0.0036	0.0036
r_GK2	guanylate kinase GMP dATP	m_datp[c] + m_gmp[c] <=> m_dadp[c] + m_gdp[c]	0	0	0	0	0	0	0
r_GLCP	glycogen phosphorylase	m_glycogen[c] + m_pi[c] -> m_g1p[c]	0	0	0	0	0	0	0
r_GLCS2	glycogen synthase ADPGlc	m_adpglc[c] -> m_14glun[c] + m_adp[c] + m_h[c]	0.370868	0.370868	0.076861	0.076861	0.076861	0.076861	0.076861
r_GLGCR	glucose 1 phosphate adenylyltransferase	m_atp[c] + m_g1p[c] + m_h[c] <=> m_adpglc[c] + m_ppi[c]	0.370868	0.370868	0.076861	0.076861	0.076861	0.076861	0.076861
r_GLNABC	L glutamine transport via ABC system	m_atp[c] + m_gln_l[e] + m_h2o[c] -> m_adp[c] + m_gln_l[c] + m_h[c] + m_pi[c]	0	0	0	0	0	0	0
r_GLNS	glutamine synthetase	m_atp[c] + m_glu_l[c] + m_nh4[c] -> m_adp[c] + m_gln_l[c] + m_h[c] + m_pi[c]	0.126737	0.787133	0.126737	0.126737	0.787133	0.787133	0.129042
r_GLU5K	glutamate 5 kinase	m_atp[c] + m_glu_l[c] -> m_adp[c] + m_glu5p[c]	0.027136	0.027136	0.027136	0.027136	0.027136	0.027136	0.027136
r_GLUADT	glutaminyl tRNA synthase glutamine hydrolysing	m_atp[c] + m_gln_l[c] + m_glutrna[c] + m_h2o[c] -> m_adp[c] + m_glntrna[c] + m_glu_l[c] + m_h[c] + m_pi[c]	0.030528	0.030528	0.030528	0.030528	0.030528	0.030528	0.030528
r_GLUCYSL	glutamate cysteine ligase	m_atp[c] + m_cys_l[c] + m_glu_l[c] -> m_adp[c] + m_glucys[c] + m_h[c] + m_pi[c]	0	0	0	0	0	0	0
r_GLUDY	glutamate dehydrogenase NADP	m_akg[c] + m_h[c] + m_nadph[c] + m_nh4[c] -> m_glu_l[c] + m_h2o[c] + m_nadp[c]	0.653454	0	0.653454	0.653454	0	0	0.590992
r_GLUPRT	glutamine phosphoribosyldiphosphate amidotransferase	m_gln_l[c] + m_h2o[c] + m_prpp[c] -> m_glu_l[c] + m_ppi[c] + m_pram[c]	0.009673	0.009673	0.009673	0.009673	0.009673	0.009673	0.009673
r_GLUR	glutamate racemase	m_glu_d[c] <=> m_glu_l[c]	0	0	0	0	0	0	0
r_GLUSZ	glutamate synthase Ferredoxin	m_akg[c] + 2 m_fdxr_2_2[c] + m_gln_l[c] + 2 m_h[c] -> 2 m_fdxo_2_2[c] + 2 m_glu_l[c]	0	0.65809	0	0	0.65809	0.65809	0
r_GLUTRR	glutamyl tRNA reductase	m_glutrna[c] + m_h[c] + m_nadph[c] -> m_glu1sa[c] + m_nadp[c] + m_trnaglu[c]	0.018432	0.018432	0.018432	0.018432	0.018432	0.018432	0.018432
r_GLUTRS	Glutamyl tRNA synthetase	m_atp[c] + m_glu_l[c] + m_trnaglu[c] -> m_amp[c] + m_glutrna[c] + m_ppi[c]	0.081502	0.081502	0.081502	0.081502	0.081502	0.081502	0.081502
r_GLYCDR	Glycerol dehydrogenase reversible	m_glyc[c] + m_nad[c] <=> m_dha[c] + m_h[c] + m_nadh[c]	0	0	0	0	0	0	0
r_GLYCL	Glycine Cleavage System	m_gly[c] + m_nad[c] + m_thf[c] -> m_co2[c] + m_mlthf[c] + m_nadh[c] + m_nh4[c]	0	0	0	0	0	0	0
r_GLYCT5	glycerol transport in out via diffusion reversible	m_glyc[c] <=> m_glyc[e]	0	0	0	0	0	0	-1.41092
r_GLYCTDH	glycolate dehydrogenase	m_glyclt[c] + m_nad[c] -> m_glx[c] + m_h[c] + m_nadh[c]	0.004636	0	0.004636	0.004636	0	0	0
r_GLYK	glycerol kinase	m_atp[c] + m_glyc[c] -> m_adp[c] + m_g3p[c]	0	0	0	0	0	0	1.41092
r_GLYOX	hydroxyacylglutathione hydrolase	m_h2o[c] + m_lgt_s[c] -> m_gthrd[c] + m_h[c] + m_lac_d[c]	0	0	0	0	0	0	0
r_GLYRK	glycerate kinase	m_atp[c] + m_glyc_r[c] <=> m_3pg[c] + m_adp[c] + m_h[c]	0	0	0	0	0	0	0
r_GLYTRS	Glycyl tRNA synthetase	m_atp[c] + m_gly[c] + m_trnagly[c] -> m_amp[c] + m_glytrna[c] + m_ppi[c]	0.037206	0.037206	0.037206	0.037206	0.037206	0.037206	0.037206
r_GMPS2	GMP synthase glutamine hydrolysing	m_atp[c] + m_gln_l[c] + m_h2o[c] + m_xmp[c] -> m_amp[c] + m_glu_l[c] + m_gmp[c] + 2 m_h[c] + m_ppi[c]	0.0036	0.0036	0.0036	0.0036	0.0036	0.0036	0.0036
r_GOFUCR	GDP 4 oxo L fucose reductase	m_gdpofuc[c] + m_h[c] + m_nadph[c] -> m_gdpfuc[c] + m_nadp[c]	0	0	0	0	0	0	0
r_GRGR	Geranylgeranyl reductase	m_ggdp[c] + 3 m_h[c] + 3 m_nadph[c] -> 3 m_nadp[c] + m_phdp[c]	0.000974	0.000974	0.000974	0.000974	0.000974	0.000974	0.000974
r_GRTT	geranyltranstransferase	m_grdp[c] + m_ipdp[c] -> m_frdp[c] + m_ppi[c]	0.000974	0.000974	0.000974	0.000974	0.000974	0.000974	0.000974
r_GSG3P	glucosylglycerol 3 phosphatase	m_bglug3p[c] + m_h2o[c] <=> m_bgluglyc[c] + m_pi[c]	0	0	0	0	0	0	0
r_GSHPO	glutathione peroxidase	2 m_gthrd[c] + m_h2o2[c] -> m_gthox[c] + 2 m_h2o[c]	0	0	0	0	0	0	0
r_GTCPHMT	gamma tocopherol C methyltransferase	m_amet[c] + m_gtcph[c] -> m_ahcys[c] + m_atcph[c] + m_h[c]	0	0	0	0	0	0	0
r_GTHS	glutathione synthase	m_atp[c] + m_glucys[c] + m_gly[c] -> m_adp[c] + m_gthrd[c] + m_h[c] + m_pi[c]	0	0	0	0	0	0	0
r_GTMLT	g glutamyltransferase	m_ala_l[c] + m_gthrd[c] -> m_cgly[c] + m_gluala[c]	0	0	0	0	0	0	0
r_GTPCI	GTP cyclohydrolase I	m_gtp[c] + m_h2o[c] -> m_ahdt[c] + m_formate[c] + m_h[c]	0	0	0	0	0	0	0
r_GTPCII	GTP cyclohydrolase II	m_gtp[c] + 3 m_h2o[c] -> m_25dhpp[c] + m_formate[c] + 2 m_h[c] + m_ppi[c]	0	0	0	0	0	0	0
r_GTPDPK	GTP diphosphokinase	m_atp[c] + m_gtp[c] -> m_amp[c] + m_gdptp[c] + m_h[c]	0	0	0	0	0	0	0
r_GUNCYC	Guanylate cyclase	m_gtp[c] -> m_cgmp[c] + m_ppi[c]	0	0	0	0	0	0	0
r_H2OT5	H2O transport via diffusion	m_h2o[e] <=> m_h2o[c]	-9.3137	-10.7047	-7.10864	-7.00815	-8.64663	-8.64663	-4.41388
r_H2TD	hydrogen transport	m_h2[c] <=> m_h2[e]	0	0	0	0	0	0	0
r_HBUHL1	3R 3 Hydroxybutanoyl acyl carrier protein hydro lyase	m_3hbacp[c] -> m_2beacp[c] + m_h2o[c]	0.0156	0.0156	0.0156	0.0156	0.0156	0.0156	0.0156
r_HBUR1	3R 3 Hydroxybutanoyl acyl carrier protein NADP oxidoreductase	m_actacp[c] + m_h[c] + m_nadph[c] -> m_3hbacp[c] + m_nadp[c]	0.0156	0.0156	0.0156	0.0156	0.0156	0.0156	0.0156
r_HCO3E	carbonate dehydratase HCO3 equilibration reaction	m_co2[c] + m_h2o[c] <=> m_h[c] + m_hco3[c]	0	0.150075	0	0.150075	0.150075	0.150075	0.150075
r_HCO3T	Sodium dependent bicarbonate transport	m_hco3[e] + m_na1[e] -> m_hco3[c] + m_na1[c]	0.150075	0	0.150075	0	0	0	0
r_HDDHL5	3R 3 Hydroxybutanoyl acyl carrier protein hydro lyase	m_3hddacp[c] -> m_2tddacp[c] + m_h2o[c]	0.0156	0.0156	0.0156	0.0156	0.0156	0.0156	0.0156
r_HDDR5	3R 3 Hydroxydodecanoyl acyl carrier protein NADP oxidoreductase	m_3oxddacp[c] + m_h[c] + m_nadph[c] -> m_3hddacp[c] + m_nadp[c]	0.0156	0.0156	0.0156	0.0156	0.0156	0.0156	0.0156
r_HDEHL4	3R 3 Hydroxybutanoyl acyl carrier protein hydro lyase	m_3hdeacp[c] -> m_2tdeacp[c] + m_h2o[c]	0.0156	0.0156	0.0156	0.0156	0.0156	0.0156	0.0156
r_HDER4	3R 3 Hydroxydecanoyl acyl carrier protein NADP oxidoreductase	m_3oxdeacp[c] + m_h[c] + m_nadph[c] -> m_3hdeacp[c] + m_nadp[c]	0.0156	0.0156	0.0156	0.0156	0.0156	0.0156	0.0156
r_HDH1	Bidirectional hydrogenase nad nadh	m_h2[c] + m_nad[c] <=> m_h[c] + m_nadh[c]	0	0	0	0	0	0	0
r_HDH2	Bidirectional Hydrogenase nadp nadph	m_h2[c] + m_nadp[c] <=> m_h[c] + m_nadph[c]	0	0	0	0	0	0	0
r_HDMAT7	Hexadecanoyl acyl carrier protein malonyl CoA C acyltransferase	m_h[c] + m_hdeacp[c] + m_nadh[c] -> m_nad[c] + m_palmacp[c]	0.0156	0.0156	0.0156	0.0156	0.0156	0.0156	0.0156
r_HDROXGLUADL	4 hydroxy 2 oxoglutarate aldolase	m_glx[c] + m_pyr[c] <=> m_4h2oxg[c]	0	0	0	0	0	0	0
r_HEMAT2	Hexanoyl acyl carrier protein malonyl CoA C acyltransferase	m_2theacp[c] + m_h[c] + m_nadh[c] -> m_hexacp[c] + m_nad[c]	0.0156	0.0156	0.0156	0.0156	0.0156	0.0156	0.0156
r_HEMEAS	Heme A synthase	m_h2o[c] + m_hemeo[c] -> 4 m_h[c] + m_hemea[c]	0	0	0	0	0	0	0
r_HEMEOS	Heme O synthase	m_frdp[c] + m_h2o[c] + m_pheme[c] -> m_h[c] + m_hemeo[c] + m_ppi[c]	0	0	0	0	0	0	0
r_HEX1	hexokinase D glucose ATP	m_atp[c] + m_glc_d[c] -> m_adp[c] + m_g6p[c] + m_h[c]	0	0	0	0	0	0	0
r_HEXTT	trans hexaprenyltranstransferase	m_hexdp[c] + m_ipdp[c] -> m_hepdp[c] + m_ppi[c]	0	0	0	0	0	0	0
r_HGR	mercury II reductase	m_hg2[c] + m_nadph[c] <=> m_h[c] + m_hg0[c] + m_nadp[c]	0	0	0	0	0	0	0
r_HHDHL7	3R 3 Hydroxypalmitoyl acyl carrier protein hydro lyase	m_3hpaacp[c] -> m_h2o[c] + m_hdeacp[c]	0.0156	0.0156	0.0156	0.0156	0.0156	0.0156	0.0156
r_HHDR7	3R 3 Hydroxypalmitoyl acyl carrier protein NADP oxidoreductase	m_3oxhdacp[c] + m_h[c] + m_nadph[c] -> m_3hpaacp[c] + m_nadp[c]	0.0156	0.0156	0.0156	0.0156	0.0156	0.0156	0.0156
r_HHYHL2	3R 3 Hydroxybutanoyl acyl carrier protein hydro lyase	m_3hhacp[c] -> m_2theacp[c] + m_h2o[c]	0.0156	0.0156	0.0156	0.0156	0.0156	0.0156	0.0156
r_HHYR2	3R 3 Hydroxyhexanoyl acyl carrier protein NADP oxidoreductase	m_3oxhacp[c] + m_h[c] + m_nadph[c] -> m_3hhacp[c] + m_nadp[c]	0.0156	0.0156	0.0156	0.0156	0.0156	0.0156	0.0156
r_HISD	histidinol dehydrogenase	m_h2o[c] + m_histd[c] + 2 m_nad[c] -> 3 m_h[c] + m_his_l[c] + 2 m_nadh[c]	0.010441	0.010441	0.010441	0.010441	0.010441	0.010441	0.010441
r_HISTP	histidinol phosphatase	m_h2o[c] + m_hisp[c] -> m_histd[c] + m_pi[c]	0.010441	0.010441	0.010441	0.010441	0.010441	0.010441	0.010441
r_HISTRS	Histidyl tRNA synthetase	m_atp[c] + m_his_l[c] + m_trnahis[c] -> m_amp[c] + m_histrna[c] + m_ppi[c]	0.010441	0.010441	0.010441	0.010441	0.010441	0.010441	0.010441
r_HMBS	hydroxymethylbilane synthase	m_h2o[c] + 4 m_ppbng[c] -> m_hmbil[c] + 4 m_nh4[c]	0.002304	0.002304	0.002304	0.002304	0.002304	0.002304	0.002304
r_HMOX	heme oxygenase	4 m_h[c] + 3 m_nadh[c] + 3 m_o2[c] + m_pheme[c] -> m_biliverdin[c] + m_co[c] + m_fe2[c] + 3 m_h2o[c] + 3 m_nad[c]	0.00133	0.00133	0.00133	0.00133	0.00133	0.00133	0.00133
r_HMPK1	hydroxymethylpyrimidine kinase ATP	m_4ahmmp[c] + m_atp[c] -> m_4ampm[c] + m_adp[c] + m_h[c]	0	0	0	0	0	0	0
r_HMST	homogentisate solanyltransferase	m_h[c] + m_hgentis[c] + m_nondp[c] <=> m_co2[c] + m_msbq[c] + m_ppi[c]	0	0	0	0	0	0	0
r_HOCHL3	3R 3 Hydroxybutanoyl acyl carrier protein hydro lyase	m_3hocacp[c] -> m_2toceacp[c] + m_h2o[c]	0.0156	0.0156	0.0156	0.0156	0.0156	0.0156	0.0156
r_HOCR3	3R 3 Hydroxyoctanoyl acyl carrier protein NADP oxidoreductase	m_3oxocacp[c] + m_h[c] + m_nadph[c] -> m_3hocacp[c] + m_nadp[c]	0.0156	0.0156	0.0156	0.0156	0.0156	0.0156	0.0156
r_HODHL8	3R 3 Hydroxyoctadecanoyl acyl carrier protein hydro lyase	m_3hocdacp[c] -> m_2tocdacp[c] + m_h2o[c]	0.005772	0.005772	0.005772	0.005772	0.005772	0.005772	0.005772
r_HODR8	3R 3 Hydroxyoctadecanoyl acyl carrier protein NADP oxidoreductase	m_3oxocdacp[c] + m_h[c] + m_nadph[c] -> m_3hocdacp[c] + m_nadp[c]	0.005772	0.005772	0.005772	0.005772	0.005772	0.005772	0.005772
r_HOXPRX	2 hydroxy 3 oxopropionate reductase NAD	m_glyc_r[c] + m_nad[c] <=> m_2h3opp[c] + m_h[c] + m_nadh[c]	0	0	0	0	0	0	0
r_HOXPR_NADP	2 hydroxy 3 oxopropionate reductase NADP	m_2h3opp[c] + m_h[c] + m_nadph[c] -> m_glyc_r[c] + m_nadp[c]	0	0	0	0	0	0	0
r_HP5CD	3 hydroxy 1 pyrroline 5 carboxylate dehydrogenase	m_1p3h5c[c] + 2 m_h2o[c] + m_nad[c] -> m_e4h2oxg[c] + m_h[c] + m_nadh[c]	0	0	0	0	0	0	0
r_HPPDO1	4 hydroxyphenylpyruvate dioxygenase	m_34hpp[c] + m_o2[c] -> m_co2[c] + m_hgentis[c]	0	0	0	0	0	0	0
r_HPPK	2 amino 4 hydroxy 6 hydroxymethyldihydropteridine diphosphokinase	m_2ahhmp[c] + m_atp[c] -> m_2ahhmd[c] + m_amp[c] + m_h[c]	0	0	0	0	0	0	0
r_HPT	tocopherol phytyltransferase	m_h[c] + m_hgentis[c] + m_phdp[c] <=> m_co2[c] + m_mtpq[c] + m_ppi[c]	0	0	0	0	0	0	0
r_HSAT	Acetyl CoA L homoserine O acetyltransferase	m_accoa[c] + m_hom_l[c] <=> m_achms[c] + m_coa[c]	0.010282	0.010282	0.010282	0.010282	0.010282	0.010282	0.010282
r_HSDY	homoserine dehydrogenase NADPH	m_hom_l[c] + m_nadp[c] <=> m_aspsa[c] + m_h[c] + m_nadph[c]	-0.074306	-0.074306	-0.074306	-0.074306	-0.074306	-0.074306	-0.041022
r_HSK	homoserine kinase	m_atp[c] + m_hom_l[c] -> m_adp[c] + m_h[c] + m_phom[c]	0.064024	0.064024	0.064024	0.064024	0.064024	0.064024	0.03074
r_HSTPT	histidinol phosphate transaminase	m_glu_l[c] + m_imacp[c] -> m_akg[c] + m_h[c] + m_hisp[c]	0.010441	0.010441	0.010441	0.010441	0.010441	0.010441	0.010441
r_HTDHL6	3R 3 Hydroxypalmitoyl acyl carrier protein hydro lyase	m_3htdacp[c] -> m_h2o[c] + m_tdeacp[c]	0.0156	0.0156	0.0156	0.0156	0.0156	0.0156	0.0156
r_HTDR6	3R 3 Hydroxytetradecanoyl acyl carrier protein NADP oxidoreductase	m_3oxtdacp[c] + m_h[c] + m_nadph[c] -> m_3htdacp[c] + m_nadp[c]	0.0156	0.0156	0.0156	0.0156	0.0156	0.0156	0.0156
r_HTHBPD	4a hydroxytetrahydrobiopterin dehydratase	m_5678thh[c] -> m_78dhp[c] + m_h2o[c]	0	0	0	0	0	0	0
r_ICDHY	isocitrate dehydrogenase NADP	m_icit[c] + m_nadp[c] <=> m_akg[c] + m_co2[c] + m_nadph[c]	0.136516	0.136516	0.136516	0.136516	0.136516	0.136516	0.213694
r_ICHORS	isochorismate synthase	m_chor[c] <=> m_ichor[c]	0	0	0	0	0	0	0
r_IG3PS	Imidazole glycerol 3 phosphate synthase	m_gln_l[c] + m_prlp[c] -> m_aicar[c] + m_eig3p[c] + m_glu_l[c] + 2 m_h[c]	0.010441	0.010441	0.010441	0.010441	0.010441	0.010441	0.010441
r_IGPDH	imidazoleglycerol phosphate dehydratase	m_eig3p[c] + m_h[c] -> m_h2o[c] + m_imacp[c]	0.010441	0.010441	0.010441	0.010441	0.010441	0.010441	0.010441
r_IGPS	indole 3 glycerol phosphate synthase	m_2cpr5p[c] + m_h[c] -> m_3ig3p[c] + m_co2[c] + m_h2o[c]	0.007897	0.007897	0.007897	0.007897	0.007897	0.007897	0.007897
r_ILEABC	L isoleucine transport via ABC system	m_atp[c] + m_h2o[c] + m_ile_l[e] -> m_adp[c] + m_h[c] + m_ile_l[c] + m_pi[c]	0	0	0	0	0	0	0
r_ILETA	isoleucine transaminase	m_akg[c] + m_ile_l[c] <=> m_3mop[c] + m_glu_l[c]	-0.033284	-0.033284	-0.033284	-0.033284	-0.033284	-0.033284	-0.033284
r_ILETRS	Isoleucyl tRNA synthetase	m_atp[c] + m_ile_l[c] + m_trnaile[c] -> m_amp[c] + m_iletrna[c] + m_ppi[c]	0.033284	0.033284	0.033284	0.033284	0.033284	0.033284	0.033284
r_IMPC	IMP cyclohydrolase	m_h2o[c] + m_imp[c] <=> m_fprica[c]	-0.020114	-0.020114	-0.020114	-0.020114	-0.020114	-0.020114	-0.020114
r_IMPD	IMP dehydrogenase	m_h2o[c] + m_imp[c] + m_nad[c] -> m_h[c] + m_nadh[c] + m_xmp[c]	0.0036	0.0036	0.0036	0.0036	0.0036	0.0036	0.0036
r_IODP	inorganic diphosphatase	m_h2o[c] + m_ppi[c] -> m_h[c] + 2 m_pi[c]	1.05297	1.05297	0.758964	0.758964	0.758964	0	0.758964
r_IPDDI	isopentenyl diphosphate D isomerase	m_ipdp[c] <=> m_dmpp[c]	0	0	0	0	0	0	0
r_IPDPS	1 hydroxy 2 methyl 2 E butenyl 4 diphosphate reductase ipdp	m_h[c] + m_h2mb4p[c] + m_nadh[c] -> m_h2o[c] + m_ipdp[c] + m_nad[c]	0	0	0	0	0	0.002922	0.002922
r_IPDPS1	1 hydroxy 2 methyl 2 E butenyl 4 diphosphate reductase ipdp NADP	m_h[c] + m_h2mb4p[c] + m_nadph[c] -> m_h2o[c] + m_ipdp[c] + m_nadp[c]	0.002922	0.002922	0.002922	0.002922	0.002922	0	0
r_IPDPUPT	di trans poly cis Decaprenyl diphosphate isopentenyl diphosphate undecaprenylcistransferase	7 m_ipdp[c] + m_tcggrpp[c] -> m_dtpcudcpp[c] + 7 m_ppi[c]	0	0	0	0	0	0	0
r_IPMD	3 isopropylmalate dehydrogenase	m_3c2hmp[c] + m_nad[c] -> m_3c4mop[c] + m_h[c] + m_nadh[c]	0.059784	0.059784	0.059784	0.059784	0.059784	0.059784	0.059784
r_IPPMIA	3 isopropylmalate dehydratase	m_3c2hmp[c] <=> m_2ippm[c] + m_h2o[c]	-0.059784	-0.059784	-0.059784	-0.059784	-0.059784	-0.059784	-0.059784
r_IPPMIB	2 isopropylmalate hydratase	m_2ippm[c] + m_h2o[c] <=> m_3c3hmp[c]	-0.059784	-0.059784	-0.059784	-0.059784	-0.059784	-0.059784	-0.059784
r_IPPS	2 isopropylmalate synthase	m_3mob[c] + m_accoa[c] + m_h2o[c] -> m_3c3hmp[c] + m_coa[c] + m_h[c]	0.059784	0.059784	0.059784	0.059784	0.059784	0.059784	0.059784
r_ITPASE	dITP pyrophosphatase	m_ditp[c] + m_h2o[c] -> m_dimp[c] + m_ppi[c]	0	0	0	0	0	0	0
r_KABC	potassium transport via ABC system	m_atp[c] + m_h2o[c] + m_k[e] -> m_adp[c] + m_h[c] + m_k[c] + m_pi[c]	0	0	0	0	0	0	0
r_KARA1	ketol acid reductoisomerase 2 3 dihydroxy 3 methylbutanoate	m_23dhmb[c] + m_nadp[c] <=> m_alac_s[c] + m_h[c] + m_nadph[c]	-0.094512	-0.094512	-0.094512	-0.094512	-0.094512	-0.094512	-0.094512
r_KARA2	ketol acid reductoisomerase 2 Acetolactate	m_2ahbut[c] + m_h[c] + m_nadph[c] <=> m_23dhmp[c] + m_nadp[c]	0.033284	0.033284	0.033284	0.033284	0.033284	0.033284	0.033284
r_KAS15	b ketoacyl synthase	m_accoa[c] + m_h[c] + m_malacp[c] -> m_actacp[c] + m_co2[c] + m_coa[c]	0.0156	0.0156	0.0156	0.0156	0.0156	0.0156	0.0156
r_KT2I	potassium irreversible transport via proton symporter	m_h[e] + m_k[e] -> m_h[c] + m_k[c]	0	0	0	0	0	0	0
r_KTABC	H K exchanging ATPase	m_atp[c] + m_h2o[c] + m_k[e] -> m_adp[c] + m_h[e] + m_k[c] + m_pi[c]	0	0	0	0	0	0	0
r_LCAD	lactaldehyde dehydrogenase	m_h2o[c] + m_lald_l[c] + m_nad[c] <=> 2 m_h[c] + m_lac_l[c] + m_nadh[c]	0	0	0	0	0	0	0
r_LDH_D	D lactate dehydrogenase	m_lac_d[c] + m_nad[c] <=> m_h[c] + m_nadh[c] + m_pyr[c]	0	0	0	0	0	0	0
r_LEUABC	L leucine transport via ABC system	m_atp[c] + m_h2o[c] + m_leu_l[e] -> m_adp[c] + m_h[c] + m_leu_l[c] + m_pi[c]	0	0	0	0	0	0	0
r_LEUTA	leucine transaminase	m_akg[c] + m_leu_l[c] <=> m_4mop[c] + m_glu_l[c]	-0.059784	-0.059784	-0.059784	-0.059784	-0.059784	-0.059784	-0.059784
r_LEUTRS	Leucyl tRNA synthetase	m_atp[c] + m_leu_l[c] + m_trnaleu[c] -> m_amp[c] + m_leutrna[c] + m_ppi[c]	0.059784	0.059784	0.059784	0.059784	0.059784	0.059784	0.059784
r_LGTHL	lactoylglutathione lyase	m_gthrd[c] + m_mthgxl[c] -> m_lgt_s[c]	0	0	0	0	0	0	0
r_LIPSYN_SYN	Lipid biosynthesis of Synechococcus	0.125 m_dgdg_syn[c] + 0.606 m_mgdg_syn[c] + 0.166 m_pgly_syn[c] + 0.103 m_sqdg_syn[c] -> m_lipid_syn[c]	0.000156	0.000156	0.000156	0.000156	0.000156	0.000156	0.000156
r_LPADSS	Lipid A disaccaride synthase	m_lipidx[c] + m_u23ga[c] -> m_h[c] + m_lipidads[c] + m_udp[c]	0	0	0	0	0	0	0
r_LYSDC	lysine decarboxylase	m_h[c] + m_lys_l[c] -> m_15dap[c] + m_co2[c]	0	0	0	0	0	0	0
r_LYSTRS	Lysyl tRNA synthetase	m_atp[c] + m_lys_l[c] + m_trnalys[c] -> m_amp[c] + m_lystrna[c] + m_ppi[c]	0.022101	0.022101	0.022101	0.022101	0.022101	0.022101	0.022101
r_MACPMT	Malonyl CoA acyl carrier protein S malonyltransferase	m_acp[c] + m_malcoa[c] -> m_coa[c] + m_malacp[c]	0.114972	0.114972	0.114972	0.114972	0.114972	0.114972	0.114972
r_MALTABC	maltose transport via ABC system	m_atp[c] + m_h2o[c] + m_malt[e] -> m_adp[c] + m_h[c] + m_malt[c] + m_pi[c]	0	0	0	0	0	0	0
r_MALTHXABC	maltohexaose transport via ABC system	m_atp[c] + m_h2o[c] + m_malthx[e] -> m_adp[c] + m_h[c] + m_malthx[c] + m_pi[c]	0	0	0	0	0	0	0
r_MALTPTABC	maltopentaose transport via ABC system	m_atp[c] + m_h2o[c] + m_maltpt[e] -> m_adp[c] + m_h[c] + m_maltpt[c] + m_pi[c]	0	0	0	0	0	0	0
r_MALTTRABC	Maltotriose transport via ABC system	m_atp[c] + m_h2o[c] + m_malttr[e] -> m_adp[c] + m_h[c] + m_malttr[c] + m_pi[c]	0	0	0	0	0	0	0
r_MALTTTRABC	maltotetraose transport via ABC system	m_atp[c] + m_h2o[c] + m_maltttr[e] -> m_adp[c] + m_h[c] + m_maltttr[c] + m_pi[c]	0	0	0	0	0	0	0
r_MAN1PT1	mannose 1 phosphate guanylyltransferase	m_gtp[c] + m_h[c] + m_man1p[c] -> m_gdpman[c] + m_ppi[c]	0	0	0	0	0	0	0
r_MAN1PT2	mannose 1 phosphate guanylyltransferase GDP	m_gdp[c] + m_h[c] + m_man1p[c] -> m_gdpman[c] + m_pi[c]	0	0	0	0	0	0	0
r_MAN6PI	mannose 6 phosphate isomerase	m_man6p[c] <=> m_f6p[c]	0	0	0	0	0	0	0
r_MCMAT2	Butyryl acyl carrier protein malonyl acyl carrier protein C acyltransferase decarboxylating	m_butacp[c] + m_h[c] + m_malacp[c] -> m_3oxhacp[c] + m_acp[c] + m_co2[c]	0.0156	0.0156	0.0156	0.0156	0.0156	0.0156	0.0156
r_MCMAT3	Hexanoyl acyl carrier protein malonyl acyl carrier protein C acyltransferase	m_h[c] + m_hexacp[c] + m_malacp[c] -> m_3oxocacp[c] + m_acp[c] + m_co2[c]	0.0156	0.0156	0.0156	0.0156	0.0156	0.0156	0.0156
r_MCMAT4	Octanoyl acyl carrier protein malonyl acyl carrier protein C acyltransferase decarboxylating	m_h[c] + m_malacp[c] + m_octacp[c] -> m_3oxdeacp[c] + m_acp[c] + m_co2[c]	0.0156	0.0156	0.0156	0.0156	0.0156	0.0156	0.0156
r_MCMAT5	Decanoyl acyl carrier protein malonyl acyl carrier protein C acyltransferase	m_decacp[c] + m_h[c] + m_malacp[c] -> m_3oxddacp[c] + m_acp[c] + m_co2[c]	0.0156	0.0156	0.0156	0.0156	0.0156	0.0156	0.0156
r_MCMAT6	Dodecanoyl acyl carrier protein malonyl acyl carrier protein C acyltransferase	m_ddcaacp[c] + m_h[c] + m_malacp[c] -> m_3oxtdacp[c] + m_acp[c] + m_co2[c]	0.0156	0.0156	0.0156	0.0156	0.0156	0.0156	0.0156
r_MCMAT7	Tetradecanoyl acyl carrier protein malonyl acyl carrier protein C acyltransferase	m_h[c] + m_malacp[c] + m_myrsacp[c] -> m_3oxhdacp[c] + m_acp[c] + m_co2[c]	0.0156	0.0156	0.0156	0.0156	0.0156	0.0156	0.0156
r_MCMAT8	Hexadecanoyl acyl carrier protein malonyl acyl carrier protein C acyltransferase	m_h[c] + m_malacp[c] + m_palmacp[c] -> m_3oxocdacp[c] + m_acp[c] + m_co2[c]	0.005772	0.005772	0.005772	0.005772	0.005772	0.005772	0.005772
r_MDH	malate dehydrogenase	m_mal_l[c] + m_nad[c] <=> m_h[c] + m_nadh[c] + m_oaa[c]	0.053971	0	0.053971	0.053971	0	0	0
r_MDRPI	methylthioribose 1 phosphate isomerase	m_5mdr1p[c] <=> m_5mdru1p[c]	0	0	0	0	0	0	0
r_ME2	malic enzyme NADP	m_mal_l[c] + m_nadp[c] -> m_co2[c] + m_nadph[c] + m_pyr[c]	0	0.053971	0	0	0.053971	0.053971	0.131149
r_MECDPDH	2C methyl D erythritol 2 4 cyclodiphosphate dehydratase	m_2mecdp[c] + m_nadh[c] -> m_h2mb4p[c] + m_h2o[c] + m_nad[c]	0.003896	0.003896	0.003896	0.003896	0.003896	0.003896	0.003896
r_MECDPS	2 C methyl D erythritol 2 4 cyclodiphosphate synthase	m_2p4c2me[c] -> m_2mecdp[c] + m_cmp[c]	0.003896	0.003896	0.003896	0.003896	0.003896	0.003896	0.003896
r_MEHLER1	Flavin dependent dioxygen reduction NADP NADPH	2 m_h[c] + 2 m_nadph[c] + m_o2[c] -> 2 m_h2o[c] + 2 m_nadp[c]	0	0	0	0	0	0	0
r_MEHLER2	Flavin dependent dioxygen reduction Ferredoxin	4 m_fdxr_2_2[c] + 4 m_h[c] + m_o2[c] -> 4 m_fdxo_2_2[c] + 2 m_h2o[c]	0	0	0	0	0	0	0
r_MEPCT	2 C methyl D erythritol 4 phosphate cytidylyltransferase	m_2me4p[c] + m_ctp[c] + m_h[c] -> m_4c2me[c] + m_ppi[c]	0.003896	0.003896	0.003896	0.003896	0.003896	0.003896	0.003896
r_METAT	methionine adenosyltransferase	m_atp[c] + m_h2o[c] + m_met_l[c] -> m_amet[c] + m_pi[c] + m_ppi[c]	0.000974	0.000974	0.000974	0.000974	0.000974	0.000974	0.000974
r_METS	methionine synthase	m_5mthf[c] + m_hcys_l[c] -> m_h[c] + m_met_l[c] + m_thf[c]	0.011256	0.011256	0.011256	0.011256	0.011256	0.011256	0.011256
r_METTRS	Methionyl tRNA synthetase	m_atp[c] + m_met_l[c] + m_trnamet[c] -> m_amp[c] + m_mettrna[c] + m_ppi[c]	0.010282	0.010282	0.010282	0.010282	0.010282	0.010282	0.010282
r_MGLCDGST_SYN	UDPglucose 1 2 diacylglycerol 3 D glucosyltransferase Synechoccocus	0.02 m_12dgr_syn[c] + m_udpg[c] <=> 0.02 m_glcdg_syn[c] + m_h[c] + m_udp[c]	0.0057018	0.0057018	0.0057018	0.0057018	0.0057018	0.0057018	0.0057018
r_MGT5	magnesium transport in out via permease no H	m_mg2[c] <=> m_mg2[e]	-0.000974	-0.000974	-0.000974	-0.000974	-0.000974	-0.000974	-0.000974
r_MNABC	manganese transport via ABC system	m_atp[c] + m_h2o[c] + m_mn2[e] -> m_adp[c] + m_h[c] + m_mn2[c] + m_pi[c]	0	0	0	0	0	0	0
r_MOBDABC	molybdate transport via ABC system	m_atp[c] + m_h2o[c] + m_mobd[e] -> m_adp[c] + m_h[c] + m_mobd[c] + m_pi[c]	0	0	0	0	0	0	0
r_MOHMT	3 methyl 2 oxobutanoate hydroxymethyltransferase	m_3mob[c] + m_h2o[c] + m_mlthf[c] -> m_2dhp[c] + m_thf[c]	0.000914	0.000914	0.000914	0.000914	0.000914	0.000914	0.000914
r_MONOCPHS	Cyanophycin monomer synthesis	m_arg_l[c] + m_asp_l[c] + m_atp[c] -> m_adp[c] + m_arg_l_asp_l[c] + m_pi[c]	0	0	0	0	0	0	0
r_MPCHLS	Magnesium protoporphyrin IX chelatase	m_atp[c] + m_h2o[c] + m_mg2[c] + m_nad[c] + m_ppp9[c] -> m_adp[c] + 2 m_h[c] + m_mgppp9[c] + m_nadh[c] + m_pi[c]	0.000974	0.000974	0.000974	0.000974	0.000974	0.000974	0.000974
r_MPMEODR	magnesium protoporphyrin IX 13 monomethyl ester NADPH oxygen oxidoreductase hydroxylating	m_h[c] + m_mgpppmme[c] + m_nadph[c] + m_o2[c] -> m_h2o[c] + m_hmpme[c] + m_nadp[c]	0.000974	0.000974	0.000974	0.000974	0.000974	0.000974	0.000974
r_MPMEODR1	magnesium protoporphyrin IX 13 monomethyl ester NADPH oxygen oxidoreductase hydroxylating	m_h[c] + m_hmpme[c] + m_nadph[c] + m_o2[c] -> 2 m_h2o[c] + m_nadp[c] + m_ompme[c]	0.000974	0.000974	0.000974	0.000974	0.000974	0.000974	0.000974
r_MPMEODR2	magnesium protoporphyrin IX 13 monomethyl ester NADPH oxygen oxidoreductase hydroxylating	m_h[c] + m_nadph[c] + m_o2[c] + m_ompme[c] -> m_dvpc[c] + 2 m_h2o[c] + m_nadp[c]	0.000974	0.000974	0.000974	0.000974	0.000974	0.000974	0.000974
r_MPMETS	Magnesium protoporphyrin IX methyltransferase	m_amet[c] + 2 m_h[c] + m_mgppp9[c] -> m_ahcys[c] + m_mgpppmme[c]	0.000974	0.000974	0.000974	0.000974	0.000974	0.000974	0.000974
r_MPTQMT	Methyl phytyl quinone methyl transferase	m_amet[c] + m_mtpq[c] -> m_ahcys[c] + m_dmptq[c] + m_h[c]	0	0	0	0	0	0	0
r_MSBQMT	Methyl solanyl benzoquinone methyl transferase	m_amet[c] + m_msbq[c] -> m_ahcys[c] + m_h[c] + m_pq9h2[c]	0	0	0	0	0	0	0
r_MTAP	5 methylthioadenosine phosphorylase	m_5mta[c] + m_pi[c] -> m_5mdr1p[c] + m_ade[c]	0	0	0	0	0	0	0
r_MTHFC	methenyltetrahydrofolate cyclohydrolase	m_h2o[c] + m_methf[c] <=> m_10fthf[c] + m_h[c]	0.029787	0.034423	0.029787	0.029787	0.034423	0.034423	0.034423
r_MTHFD	methylenetetrahydrofolate dehydrogenase NADP	m_mlthf[c] + m_nadp[c] <=> m_methf[c] + m_nadph[c]	0.029787	0.034423	0.029787	0.029787	0.034423	0.034423	0.034423
r_MTHFR1	5 10 methylenetetrahydrofolate reductase NADP	2 m_h[c] + m_mlthf[c] + m_nadph[c] -> m_5mthf[c] + m_nadp[c]	0.011256	0.011256	0.011256	0.011256	0.011256	0.011256	0.011256
r_MTRUPDHR	methylthioribulose 1 phosphate dehydratase	m_5mdru1p[c] <=> m_5m23dp[c] + m_h2o[c]	0	0	0	0	0	0	0
r_NAABC	Na transporting two sector ATPase	m_atp[c] + m_h2o[c] + m_na1[e] -> m_adp[c] + m_h[c] + m_na1[c] + m_pi[c]	0	0	0	0	0	0	0
r_NADHPQ9	NADH dehydrogenase plastoquinone 9 4 protons	5 m_h[c] + m_nadh[c] + m_pq9[c] -> 4 m_h[e] + m_nad[c] + m_pq9h2[c]	0.412585	0	0.412585	0.412585	0	0	0
r_NADH_PQ9	NADH dehydrogenase type II no proton pump	m_h[c] + m_nadh[c] + m_pq9[c] -> m_nad[c] + m_pq9h2[c]	0	0	0	0	0	0	0
r_NADK	NAD kinase	m_atp[c] + m_nad[c] -> m_adp[c] + m_h[c] + m_nadp[c]	5e-05	5e-05	5e-05	5e-05	5e-05	5e-05	5e-05
r_NADS1	NAD synthase nh4	m_atp[c] + m_dnad[c] + m_nh4[c] -> m_amp[c] + m_h[c] + m_nad[c] + m_ppi[c]	0.001145	0.001145	0.001145	0.001145	0.001145	0.001145	0.001145
r_NAMNPP	nicotinic acid mononucleotide pyrophosphorylase	m_atp[c] + m_h2o[c] + m_nac[c] + m_prpp[c] -> m_adp[c] + m_nicrnt[c] + m_pi[c] + m_ppi[c]	0	0	0	0	0	0	0
r_NAT3	sodium transport out via proton antiport	m_h[e] + m_na1[c] -> m_h[c] + m_na1[e]	0.150075	0	0.150075	0	0	0	0
r_NCTNA	Nicotinamidase	m_h2o[c] + m_ncam[c] -> m_nac[c] + m_nh4[c]	0	0	0	0	0	0	0
r_NDPK1	nucleoside diphosphate kinase ATP GDP	m_atp[c] + m_gdp[c] <=> m_adp[c] + m_gtp[c]	1.07667	1.07667	1.07667	1.07667	1.07667	1.07667	1.07667
r_NDPK2	nucleoside diphosphate kinase ATP UDP	m_atp[c] + m_udp[c] <=> m_adp[c] + m_utp[c]	0.0144194	0.0144194	0.0144194	0.0144194	0.0144194	0.0144194	0.0144194
r_NDPK3	nucleoside diphosphate kinase ATP CDP	m_atp[c] + m_cdp[c] <=> m_adp[c] + m_ctp[c]	0.0071356	0.0071356	0.0071356	0.0071356	0.0071356	0.0071356	0.0071356
r_NDPK4	nucleoside diphosphate kinase ATP dTDP	m_atp[c] + m_dtdp[c] <=> m_adp[c] + m_dttp[c]	0.000286	0.000286	0.000286	0.000286	0.000286	0.000286	0.000286
r_NDPK5	nucleoside diphosphate kinase ATP dGDP	m_atp[c] + m_dgdp[c] <=> m_adp[c] + m_dgtp[c]	0.000264	0.000264	0.000264	0.000264	0.000264	0.000264	0.000264
r_NDPK6	nucleoside diphosphate kinase ATP dUDP	m_atp[c] + m_dudp[c] <=> m_adp[c] + m_dutp[c]	0.000286	0.000286	0.000286	0.000286	0.000286	0.000286	0.000286
r_NDPK7	nucleoside diphosphate kinase ATP dCDP	m_atp[c] + m_dcdp[c] <=> m_adp[c] + m_dctp[c]	0.000264	0.000264	0.000264	0.000264	0.000264	0.000264	0.000264
r_NDPK8	nucleoside diphosphate kinase ATP dADP	m_atp[c] + m_dadp[c] <=> m_adp[c] + m_datp[c]	0.000286	0.000286	0.000286	0.000286	0.000286	0.000286	0.000286
r_NDPK9	nucleoside diphophate kinase ATP IDP	m_atp[c] + m_idp[c] <=> m_adp[c] + m_itp[c]	0	0	0	0	0	0	0
r_NEUSPDS	neurosporene desaturase	m_h[c] + m_nadh[c] + m_nspr[c] + m_o2[c] -> 2 m_h2o[c] + m_lyc[c] + m_nad[c]	0	0	0	0	0	0	0
r_NEUSPDS1	neurosporene desaturase nadp dependent	m_h[c] + m_nadph[c] + m_nspr[c] + m_o2[c] -> 2 m_h2o[c] + m_lyc[c] + m_nadp[c]	0	0	0	0	0	0	0
r_NH4T	ammonium transport via diffusion	m_nh4[e] <=> m_nh4[c]	0.793319	0	0.793319	0	0	0	0
r_NMHAH	N Methylimidazolidine 2 4 dione amidohydrolase ATP hydrolysing	m_atp[c] + 2 m_h2o[c] + m_nmimzd24d[c] -> m_adp[c] + 2 m_h[c] + m_ncarbsar[c] + m_pi[c]	0	0	0	0	0	0	0
r_NMNATR	nicotinamide nucleotide adenylyltransferase	m_atp[c] + m_h[c] + m_nmn[c] <=> m_nad[c] + m_ppi[c]	0	0	0	0	0	0	0
r_NNATR	nicotinate nucleotide adenylyltransferase	m_atp[c] + m_h[c] + m_nicrnt[c] <=> m_dnad[c] + m_ppi[c]	0.001145	0.001145	0.001145	0.001145	0.001145	0.001145	0.001145
r_NNDPR	nicotinate nucleotide diphosphorylase carboxylating	2 m_h[c] + m_prpp[c] + m_quln[c] -> m_co2[c] + m_nicrnt[c] + m_ppi[c]	0.001145	0.001145	0.001145	0.001145	0.001145	0.001145	0.001145
r_NO2T2	nitrite transport in via proton symport reversible	m_h[e] + m_no2[e] <=> m_h[c] + m_no2[c]	0	0	0	0	0	0	0
r_NO3ABC	Nitrate transport via ABC system	m_atp[c] + m_h2o[c] + m_no3[e] -> m_adp[c] + m_h[c] + m_no3[c] + m_pi[c]	0	0.793319	0	0	0.793319	0.793319	0.793319
r_NO3T2	nitrate transport in via proton symport	m_h[e] + m_no3[e] <=> m_h[c] + m_no3[c]	0	0	0	0	0	0	0
r_NPHS	naphthoate synthase	m_sbzcoa[c] -> m_coa[c] + m_dhna[c]	0	0	0	0	0	0	0
r_NRK	ribosylnicotinamide kinase	m_atp[c] + m_rnam[c] <=> m_adp[c] + m_h[c] + m_nmn[c]	0	0	0	0	0	0	0
r_NTD1	5 nucleotidase dUMP	m_dump[c] + m_h2o[c] -> m_duri[c] + m_pi[c]	0	0	0	0	0	0	0
r_NTD10	5 nucleotidase XMP	m_h2o[c] + m_xmp[c] -> m_pi[c] + m_xtsn[c]	0	0	0	0	0	0	0
r_NTD2	5 nucleotidase UMP	m_h2o[c] + m_ump[c] -> m_pi[c] + m_uri[c]	0	0	0	0	0	0	0
r_NTD3	5 nucleotidase dCMP	m_dcmp[c] + m_h2o[c] -> m_dcyt[c] + m_pi[c]	0	0	0	0	0	0	0
r_NTD4	5 nucleotidase CMP	m_cmp[c] + m_h2o[c] -> m_cytd[c] + m_pi[c]	0	0	0	0	0	0	0
r_NTD5	5 nucleotidase dTMP	m_dtmp[c] + m_h2o[c] -> m_pi[c] + m_thymd[c]	0	0	0	0	0	0	0
r_NTD6	5 nucleotidase dAMP	m_damp[c] + m_h2o[c] -> m_dad_2[c] + m_pi[c]	0	0	0	0	0	0	0
r_NTD7	5 nucleotidase AMP	m_amp[c] + m_h2o[c] -> m_adn[c] + m_pi[c]	0	0	0	0	0	0	0
r_NTD8	5 nucleotidase dGMP	m_dgmp[c] + m_h2o[c] -> m_dgsn[c] + m_pi[c]	0	0	0	0	0	0	0
r_NTD9	5 nucleotidase GMP	m_gmp[c] + m_h2o[c] -> m_gsn[c] + m_pi[c]	0	0	0	0	0	0	0
r_NTRARFDX	Nitrate reductase ferredoxin	2 m_fdxr_2_2[c] + 2 m_h[c] + m_no3[c] -> 2 m_fdxo_2_2[c] + m_h2o[c] + m_no2[c]	0	0.793319	0	0	0.793319	0.793319	0.793319
r_NTRIRFDX	nitrite reductase ferredoxin	6 m_fdxr_2_2[c] + 8 m_h[c] + m_no2[c] -> 6 m_fdxo_2_2[c] + 2 m_h2o[c] + m_nh4[c]	0	0.793319	0	0	0.793319	0.793319	0.793319
r_O2T	O2 transport in via diffusion	m_o2[e] <=> m_o2[c]	0.441948	0.0225	0.368446	0.393238	0.0225	0.0225	0.0225
r_OCBT	ornithine carbamoyltransferase	m_cbp[c] + m_orn_l[c] <=> m_citr_l[c] + m_h[c] + m_pi[c]	0.027878	0.027878	0.027878	0.027878	0.027878	0.027878	0.027878
r_OCDMAT8	Octadecanoyl acyl carrier protein malonyl CoA C acyltransferase	m_2tocdacp[c] + m_h[c] + m_nadh[c] -> m_nad[c] + m_ocdacp[c]	0.005772	0.005772	0.005772	0.005772	0.005772	0.005772	0.005772
r_OCMAT3	Octanoyl acyl carrier protein malonyl CoA C acyltransferase	m_2toceacp[c] + m_h[c] + m_nadh[c] -> m_nad[c] + m_octacp[c]	0.0156	0.0156	0.0156	0.0156	0.0156	0.0156	0.0156
r_OMCDC	2 Oxo 4 methyl 3 carboxypentanoate decarboxylation	m_3c4mop[c] + m_h[c] -> m_4mop[c] + m_co2[c]	0.059784	0.059784	0.059784	0.059784	0.059784	0.059784	0.059784
r_OMPDC	orotidine 5 phosphate decarboxylase	m_h[c] + m_orot5p[c] -> m_co2[c] + m_ump[c]	0.0072252	0.0072252	0.0072252	0.0072252	0.0072252	0.0072252	0.0072252
r_ORNTAC	ornithine transacetylase	m_acorn[c] + m_glu_l[c] <=> m_acglu[c] + m_orn_l[c]	0.027878	0.027878	0.027878	0.027878	0.027878	0.027878	0.027878
r_ORPT	orotate phosphoribosyltransferase	m_orot5p[c] + m_ppi[c] <=> m_orot[c] + m_prpp[c]	-0.0072252	-0.0072252	-0.0072252	-0.0072252	-0.0072252	-0.0072252	-0.0072252
r_OXPRO	5 Oxoproline amidohydrolase	m_5oxpro[c] + m_atp[c] + 2 m_h2o[c] -> m_adp[c] + m_glu_l[c] + m_h[c] + m_pi[c]	0	0	0	0	0	0	0
r_P5CD	1 pyrroline 5 carboxylate dehydrogenase	m_1pyr5c[c] + 2 m_h2o[c] + m_nad[c] -> m_glu_l[c] + m_h[c] + m_nadh[c]	0	0	0	0	0	0	0
r_P5CR	pyrroline 5 carboxylate reductase	m_1pyr5c[c] + 2 m_h[c] + m_nadph[c] -> m_nadp[c] + m_pro_l[c]	0.027136	0.027136	0.027136	0.027136	0.027136	0.027136	0.027136
r_PANTS	pantothenate synthase	m_ala_b[c] + m_atp[c] + m_pant_r[c] -> m_amp[c] + m_h[c] + m_pnto_r[c] + m_ppi[c]	0.000914	0.000914	0.000914	0.000914	0.000914	0.000914	0.000914
r_PAPPT3	phospho N acetylmuramoyl pentapeptide transferase meso 2 6 diaminopimelate	m_udcpp[c] + m_ugmda[c] -> m_uagmda[c] + m_ump[c]	0	0	0	0	0	0	0
r_PAPSR	phosphoadenylyl sulfate reductase thioredoxin	m_paps[c] + m_trdrd[c] -> 2 m_h[c] + m_pap[c] + m_so3[c] + m_trdox[c]	0.0174054	0.0174054	0.0174054	0.0174054	0.0174054	0.0174054	0.0174054
r_PCBOR	phycocyanobilin ferredoxin oxidoreductase	m_biliverdin[c] + 4 m_fdxr_2_2[c] + 4 m_h[c] -> 4 m_fdxo_2_2[c] + m_phycocyanobilin[c]	0.00133	0.00133	0.00133	0.00133	0.00133	0.00133	0.00133
r_PCR	protochlorophyllide reductase	m_h[c] + m_mvpc[c] + m_nadph[c] -> m_clpyda[c] + m_nadp[c]	0.000974	0.000974	0.000974	0.000974	0.000974	0.000974	0.000974
r_PDE1	3 5 cyclic nucleotide phosphodiesterase	m_camp[c] + m_h2o[c] -> m_amp[c] + m_h[c]	0	0	0	0	0	0	0
r_PDE2	3 5 cyclic nucleotide phosphodiesterase	m_cgmp[c] + m_h2o[c] -> m_gmp[c] + m_h[c]	0	0	0	0	0	0	0
r_PDH	pyruvate dehydrogenase	m_coa[c] + m_nad[c] + m_pyr[c] -> m_accoa[c] + m_co2[c] + m_nadh[c]	0.327121	0.327121	0.327121	0.327121	0.327121	0.327121	0
r_PDX5PO	pyridoxine 5 phosphate oxidase	m_o2[c] + m_pdx5p[c] <=> m_h[c] + m_h2o2[c] + m_pydx5p[c]	0	0	0	0	0	0	0
r_PFK	phosphofructokinase	m_atp[c] + m_f6p[c] -> m_adp[c] + m_fdp[c] + m_h[c]	0	0	0	0	0	0	0
r_PGAMT	phosphoglucosamine mutase	m_gam1p[c] <=> m_gam6p[c]	0	0	0	0	0	0	0
r_PGCDR	phosphoglycerate dehydrogenase	m_3pg[c] + m_nad[c] <=> m_3php[c] + m_h[c] + m_nadh[c]	0.085504	0.09014	0.085504	0.085504	0.09014	0.09014	0.09014
r_PGDHR	phosphogluconate dehydrogenase	m_6pgc[c] + m_nadp[c] <=> m_co2[c] + m_nadph[c] + m_ru5p_d[c]	0	0	0	0	0	0	0
r_PGI	glucose 6 phosphate isomerase	m_g6p[c] <=> m_f6p[c]	-0.379368	-0.379368	-0.0853612	-0.0853612	-0.0853612	-0.0853612	-0.0853612
r_PGK	phosphoglycerate kinase	m_13dpg[c] + m_adp[c] <=> m_3pg[c] + m_atp[c]	-10.7453	-10.7453	-7.21723	-7.21723	-7.21723	-7.21723	0.695954
r_PGL	6 phosphogluconolactonase	m_6pgl[c] + m_h2o[c] -> m_6pgc[c] + m_h[c]	0	0	0	0	0	0	0
r_PGLYCP	phosphoglycolate phosphatase	m_2pglyc[c] + m_h2o[c] -> m_glyclt[c] + m_pi[c]	0.004636	0	0.004636	0.004636	0	0	0
r_PGM	phosphoglycerate mutase	m_3pg[c] <=> m_2pg[c]	0.994641	0.994641	0.994641	0.994641	0.994641	0.994641	1.1051
r_PGMT	phosphoglucomutase	m_g1p[c] <=> m_g6p[c]	-0.379368	-0.379368	-0.0853612	-0.0853612	-0.0853612	-0.0853612	-0.0853612
r_PGPPH_SYN	Phosphatidylglycerophosphate phosphohydrolase Cyanothece	m_h2o[c] + 0.02 m_pglyp_syn[c] -> 0.02 m_pgly_syn[c] + m_pi[c]	0.0012948	0.0012948	0.0012948	0.0012948	0.0012948	0.0012948	0.0012948
r_PHCYT_SYN	phosphatidate cytidylyltransferase Synechococcus	m_ctp[c] + m_h[c] + 0.02 m_pa_syn[c] -> 0.02 m_cdpdag_syn[c] + m_ppi[c]	0.0012948	0.0012948	0.0012948	0.0012948	0.0012948	0.0012948	0.0012948
r_PHETA1	phenylalanine transaminase	m_akg[c] + m_phe_l[c] <=> m_glu_l[c] + m_phpyr[c]	-0.021518	-0.021518	-0.021518	-0.021518	-0.021518	-0.021518	-0.021518
r_PHETRS	Phenylalanyl tRNA synthetase	m_atp[c] + m_phe_l[c] + m_trnaphe[c] -> m_amp[c] + m_phetrna[c] + m_ppi[c]	0.021518	0.021518	0.021518	0.021518	0.021518	0.021518	0.021518
r_PHYFLDS	phytofluene desaturase	m_nad[c] + m_pyf[c] -> m_h[c] + m_nadh[c] + m_zcar[c]	0	0	0	0	0	0	0
r_PHYFLDS1	phytofluene desaturase nadp dependent	m_nadp[c] + m_pyf[c] -> m_h[c] + m_nadph[c] + m_zcar[c]	0	0	0	0	0	0	0
r_PHYTODS	phytoene desaturase	m_nad[c] + m_ptn[c] -> m_h[c] + m_nadh[c] + m_pyf[c]	0	0	0	0	0	0	0
r_PHYTODS1	phytoene desaturase nadp depedent	m_nadp[c] + m_ptn[c] -> m_h[c] + m_nadph[c] + m_pyf[c]	0	0	0	0	0	0	0
r_PHYTOS	phytoene synthase	2 m_ggdp[c] -> m_ppi[c] + m_pptdp[c]	0	0	0	0	0	0	0
r_PHYTOS1	phytoene synthase	m_pptdp[c] -> m_ppi[c] + m_ptn[c]	0	0	0	0	0	0	0
r_PIABC	phosphate transport via ABC system	m_atp[c] + m_h2o[c] + m_pi[e] -> m_adp[c] + m_h[c] + 2 m_pi[c]	0.0235308	0.0235308	0.0235308	0.0235308	0.0235308	0.0235308	0.0235308
r_PMANM	phosphomannomutase	m_man1p[c] <=> m_man6p[c]	0	0	0	0	0	0	0
r_PMDPHT	pyrimidine phosphatase	m_5aprbu[c] + m_h2o[c] -> m_4r5au[c] + m_pi[c]	0	0	0	0	0	0	0
r_PMPK	phosphomethylpyrimidine kinase	m_4ampm[c] + m_atp[c] -> m_2mahmp[c] + m_adp[c]	0	0	0	0	0	0	0
r_PNTK	pantothenate kinase	m_atp[c] + m_pnto_r[c] -> m_4ppan[c] + m_adp[c] + m_h[c]	0.000914	0.000914	0.000914	0.000914	0.000914	0.000914	0.000914
r_POR	pyruvate synthase	m_coa[c] + 2 m_fdxo_2_2[c] + m_pyr[c] <=> m_accoa[c] + m_co2[c] + 2 m_fdxr_2_2[c] + m_h[c]	0	0	0	0	0	0	0.437583
r_PPBNGS	porphobilinogen synthase	2 m_5aop[c] -> m_h[c] + 2 m_h2o[c] + m_ppbng[c]	0.009216	0.009216	0.009216	0.009216	0.009216	0.009216	0.009216
r_PPC	phosphoenolpyruvate carboxylase	m_co2[c] + m_h2o[c] + m_pep[c] -> m_h[c] + m_oaa[c] + m_pi[c]	0.289577	0.343548	0.289577	0.289577	0.343548	0.343548	0.387442
r_PPCDC	phosphopantothenoylcysteine decarboxylase	m_4ppcys[c] + m_h[c] -> m_co2[c] + m_pan4p[c]	0.000914	0.000914	0.000914	0.000914	0.000914	0.000914	0.000914
r_PPIK	polyphosphate kinase	m_atp[c] + m_ppi[c] -> m_adp[c] + m_pppi[c]	0	0	0	0	0	0.758964	0
r_PPNCL	phosphopantothenate cysteine ligase	m_4ppan[c] + m_ctp[c] + m_cys_l[c] -> m_4ppcys[c] + m_cdp[c] + m_h[c] + m_pi[c]	0.000914	0.000914	0.000914	0.000914	0.000914	0.000914	0.000914
r_PPND	prephenate dehydrogenase	m_nad[c] + m_pphn[c] -> m_34hpp[c] + m_co2[c] + m_nadh[c]	0.015582	0.015582	0.015582	0.015582	0.015582	0.015582	0.015582
r_PPNDH	prephenate dehydratase	m_h[c] + m_pphn[c] -> m_co2[c] + m_h2o[c] + m_phpyr[c]	0.021518	0.021518	0.021518	0.021518	0.021518	0.021518	0.021518
r_PPPGO	protoporphyrinogen oxidase	1.5 m_o2[c] + m_pppg9[c] -> 3 m_h2o[c] + m_ppp9[c]	0.002304	0.002304	0.002304	0.002304	0.002304	0.002304	0.002304
r_PPS	phosphoenolpyruvate synthase	m_atp[c] + m_h2o[c] + m_pyr[c] -> m_amp[c] + 2 m_h[c] + m_pep[c] + m_pi[c]	0	0	0	0	0	0	0
r_PQCYCOR	plastoquinone cytochrome c oxidoreductase	4 m_cyc6_ox[c] + 4 m_h[c] + 2 m_pq9h2[c] -> 4 m_cyc6_rd[c] + 8 m_h[e] + 2 m_pq9[c]	6.38906	7.35228	4.55152	4.57631	5.58824	5.58824	1.39408
r_PRAGS	phosphoribosylglycinamide synthetase	m_atp[c] + m_gly[c] + m_pram[c] -> m_adp[c] + m_gar[c] + m_h[c] + m_pi[c]	0.009673	0.009673	0.009673	0.009673	0.009673	0.009673	0.009673
r_PRAI	phosphoribosylanthranilate isomerase	m_pran[c] <=> m_2cpr5p[c]	0.007897	0.007897	0.007897	0.007897	0.007897	0.007897	0.007897
r_PRAIS	phosphoribosylaminoimidazole synthetase	m_atp[c] + m_fpram[c] -> m_adp[c] + m_air[c] + m_h[c] + m_pi[c]	0.009673	0.009673	0.009673	0.009673	0.009673	0.009673	0.009673
r_PRAMPC	phosphoribosyl AMP cyclohydrolase	m_h[c] + m_h2o[c] + m_prbamp[c] -> m_prfp[c]	0.010441	0.010441	0.010441	0.010441	0.010441	0.010441	0.010441
r_PRASCS	phosphoribosylaminoimidazolesuccinocarboxamide synthase	m_5aizc[c] + m_asp_l[c] + m_atp[c] <=> m_25aics[c] + m_adp[c] + m_h[c] + m_pi[c]	0.009673	0.009673	0.009673	0.009673	0.009673	0.009673	0.009673
r_PRATPP	phosphoribosyl ATP pyrophosphatase	m_h2o[c] + m_prbatp[c] -> m_h[c] + m_ppi[c] + m_prbamp[c]	0.010441	0.010441	0.010441	0.010441	0.010441	0.010441	0.010441
r_PRFGS	phosphoribosylformylglycinamidine synthase	m_atp[c] + m_fgam[c] + m_gln_l[c] + m_h2o[c] -> m_adp[c] + m_fpram[c] + m_glu_l[c] + 2 m_h[c] + m_pi[c]	0.009673	0.009673	0.009673	0.009673	0.009673	0.009673	0.009673
r_PRKIN	Phosphoribulokinase	m_atp[c] + m_ru5p_d[c] -> m_adp[c] + m_h[c] + m_rb15bp[c]	5.91505	5.91505	4.15101	4.15101	4.15101	4.15101	0.249645
r_PRMICI	1 5 phosphoribosyl 5 5 phosphoribosylaminomethylideneaminoimidazole 4 carboxamide isomerase	m_prfp[c] <=> m_prlp[c]	0.010441	0.010441	0.010441	0.010441	0.010441	0.010441	0.010441
r_PRO1Z	proline oxidase	m_fad[c] + m_pro_l[c] -> m_1pyr5c[c] + m_fadh2[c] + m_h[c]	0	0	0	0	0	0	0
r_PROTRS	Prolyl tRNA synthetase	m_atp[c] + m_pro_l[c] + m_trnapro[c] -> m_amp[c] + m_ppi[c] + m_protrna[c]	0.027136	0.027136	0.027136	0.027136	0.027136	0.027136	0.027136
r_PROTSYN_SYN	Protein synthesis Synechococcus 7002	897 m_alatrna[c] + 526 m_argtrna[c] + 374 m_asntrna[c] + 518 m_asptrna[c] + 102 m_cystrna[c] + 576 m_glntrna[c] + 614 m_glutrna[c] + 702 m_glytrna[c] + 19940 m_gtp[c] + 19970 m_h2o[c] + 197 m_histrna[c] + 628 m_iletrna[c] + 1128 m_leutrna[c] + 417 m_lystrna[c] + 194 m_mettrna[c] + 406 m_phetrna[c] + 512 m_protrna[c] + 548 m_sertrna[c] + 580 m_thrtrna[c] + 149 m_trptrna[c] + 294 m_tyrtrna[c] + 638…	5.3e-05	5.3e-05	5.3e-05	5.3e-05	5.3e-05	5.3e-05	5.3e-05
r_PRPPS	phosphoribosylpyrophosphate synthetase	m_atp[c] + m_r5p[c] <=> m_amp[c] + m_h[c] + m_prpp[c]	0.0363812	0.0363812	0.0363812	0.0363812	0.0363812	0.0363812	0.0363812
r_PSCVT	3 phosphoshikimate 1 carboxyvinyltransferase	m_pep[c] + m_skm5p[c] <=> m_3psme[c] + m_pi[c]	0.044997	0.044997	0.044997	0.044997	0.044997	0.044997	0.044997
r_PSERT	phosphoserine transaminase	m_3php[c] + m_glu_l[c] -> m_akg[c] + m_pser_l[c]	0.085504	0.09014	0.085504	0.085504	0.09014	0.09014	0.09014
r_PSIIR	photosystem II reaction	4 m_h[c] + 2 m_h2o[e] + 4 m_photon_psii[e] + 2 m_pq9[c] -> 4 m_h[e] + m_o2[e] + 2 m_pq9h2[c]	6.17863	7.34814	4.34109	4.36588	5.5841	5.5841	1.35135
r_PSIR_CYC	Photosystem I Reaction cytochrome c6	4 m_cyc6_rd[c] + 4 m_fdxo_2_2[c] + 4 m_photon_psi[e] -> 4 m_cyc6_ox[c] + 4 m_fdxr_2_2[c]	5.97425	7.35228	4.21021	4.21021	5.58824	5.58824	1.39408
r_PSP_L	phosphoserine phosphatase L serine	m_h2o[c] + m_pser_l[c] -> m_pi[c] + m_ser_l[c]	0.085504	0.09014	0.085504	0.085504	0.09014	0.09014	0.09014
r_PSUDS	pseudouridylate synthase	m_r5p[c] + m_ura[c] -> m_h2o[c] + m_psd5p[c]	0	0	0	0	0	0	0
r_PTHPS	6 pyruvoyltetrahydropterin synthase	m_ahdt[c] -> m_6pthp[c] + m_pppi[c]	0	0	0	0	0	0	0
r_PTPAT	pantetheine phosphate adenylyltransferase	m_atp[c] + m_h[c] + m_pan4p[c] <=> m_dpcoa[c] + m_ppi[c]	0.000914	0.000914	0.000914	0.000914	0.000914	0.000914	0.000914
r_PTRCABC	putrescine transport via ABC system	m_atp[c] + m_h2o[c] + m_ptrc[e] -> m_adp[c] + m_h[c] + m_pi[c] + m_ptrc[c]	0	0	0	0	0	0	0
r_PYAM5PO	pyridoxamine phosphate oxidase	m_h2o[c] + m_o2[c] + m_pyam5p[c] -> m_h2o2[c] + m_nh4[c] + m_pydx5p[c]	0	0	0	0	0	0	0
r_PYDX5PS	pyridoxine 5 phosphate synthase	m_amoppro[c] + m_dxyl5p[c] <=> 2 m_h2o[c] + m_pdx5p[c] + m_pi[c]	0	0	0	0	0	0	0
r_PYK	pyruvate kinase	m_adp[c] + m_h[c] + m_pep[c] -> m_atp[c] + m_pyr[c]	0.61507	0.561099	0.61507	0.61507	0.561099	0.561099	0.627667
r_QULNS	quinolinate synthase	m_dhap[c] + m_iasp[c] -> 2 m_h2o[c] + m_pi[c] + m_quln[c]	0.001145	0.001145	0.001145	0.001145	0.001145	0.001145	0.001145
r_RBC	ribulose 1 5 bisphosphate carboxylase	m_co2[c] + m_h2o[c] + m_rb15bp[c] -> 2 m_3pg[c] + 2 m_h[c]	5.91041	5.91505	4.14637	4.14637	4.15101	4.15101	0.249645
r_RBFK	riboflavin kinase	m_atp[c] + m_ribflv[c] -> m_adp[c] + m_fmn[c] + m_h[c]	0	0	0	0	0	0	0
r_RBFSA	riboflavin synthase	m_4r5au[c] + m_db4p[c] -> m_dmlz[c] + 2 m_h2o[c] + m_pi[c]	0	0	0	0	0	0	0
r_RBFSB	riboflavin synthase	2 m_dmlz[c] -> m_4r5au[c] + m_ribflv[c]	0	0	0	0	0	0	0
r_RBO	ribulose 1 5 bisphosphate oxygenase	m_o2[c] + m_rb15bp[c] -> m_2pglyc[c] + m_3pg[c] + 2 m_h[c]	0.004636	0	0.004636	0.004636	0	0	0
r_RNASYN_SYN	RNA replication Synechococcus PCC 7002	126 m_atp[c] + 24 m_ctp[c] + 24 m_gtp[c] + 100 m_h2o[c] + 26 m_utp[c] -> 100 m_adp[c] + 100 m_h[c] + 100 m_pi[c] + 100 m_ppi[c] + m_rna_syn[c]	0.000139	0.000139	0.000139	0.000139	0.000139	0.000139	0.000139
r_RNDR1	ribonucleoside diphosphate reductase ADP	m_adp[c] + m_trdrd[c] -> m_dadp[c] + m_h2o[c] + m_trdox[c]	0.000286	0.000286	0.000286	0.000286	0.000286	0.000286	0.000286
r_RNDR2	ribonucleoside diphosphate reductase GDP	m_gdp[c] + m_trdrd[c] -> m_dgdp[c] + m_h2o[c] + m_trdox[c]	0.000264	0.000264	0.000264	0.000264	0.000264	0.000264	0.000264
r_RNDR3	ribonucleoside diphosphate reductase CDP	m_cdp[c] + m_trdrd[c] -> m_dcdp[c] + m_h2o[c] + m_trdox[c]	0.000264	0.000264	0.000264	0.000264	0.000264	0.000264	0.000264
r_RNDR4	ribonucleoside diphosphate reductase UDP	m_trdrd[c] + m_udp[c] -> m_dudp[c] + m_h2o[c] + m_trdox[c]	0.000286	0.000286	0.000286	0.000286	0.000286	0.000286	0.000286
r_RPE	ribulose 5 phosphate 3 epimerase	m_ru5p_d[c] <=> m_xu5p_d[c]	-3.98262	-3.98262	-2.80659	-2.80659	-2.80659	-2.80659	-0.205683
r_RPI	ribose 5 phosphate isomerase	m_r5p[c] <=> m_ru5p_d[c]	1.93243	1.93243	1.34442	1.34442	1.34442	1.34442	0.0439617
r_SADT1	sulfate adenylyltransferase	m_atp[c] + m_h[c] + m_so4[c] -> m_aps[c] + m_ppi[c]	0.0174054	0.0174054	0.0174054	0.0174054	0.0174054	0.0174054	0.0174054
r_SBP	sedoheptulose bisphosphatase	m_h2o[c] + m_s17bp[c] -> m_pi[c] + m_s7p[c]	1.96881	1.96881	1.3808	1.3808	1.3808	1.3808	0.0803429
r_SDPTA	succinyldiaminopimelate transaminase	m_akg[c] + m_sl26da[c] <=> m_glu_l[c] + m_sl2a6o[c]	0	0	0	0	0	0	0
r_SEPHCC	2 succinyl 5 enolpyruvyl 6 hydroxy 3 cyclohexene 1 carboxylate synthase	m_akg[c] + m_h[c] + m_ichor[c] -> m_co2[c] + m_sucephcc[c]	0	0	0	0	0	0	0
r_SERAT	serine O acetyltransferase	m_accoa[c] + m_ser_l[c] <=> m_acser[c] + m_coa[c]	0.00632	0.00632	0.00632	0.00632	0.00632	0.00632	0.00632
r_SERTRS	Seryl tRNA synthetase	m_atp[c] + m_ser_l[c] + m_trnaser[c] -> m_amp[c] + m_ppi[c] + m_sertrna[c]	0.029044	0.029044	0.029044	0.029044	0.029044	0.029044	0.029044
r_SFGH	S formylglutathione hydrolase	m_h2o[c] + m_sfgthrd[c] <=> m_formate[c] + m_gthrd[c]	0	0	0	0	0	0	0
r_SGAR	serine glyoxylate aminotransferase	m_glx[c] + m_ser_l[c] <=> m_gly[c] + m_hpyr[c]	0	0	0	0	0	0	0
r_SHCHCS	2 succinyl 6 hydroxy 2 4 cyclohexadiene 1 carboxylate synthase	m_sucephcc[c] -> m_2shchc[c] + m_pyr[c]	0	0	0	0	0	0	0
r_SHGD	S hydroxymethylglutahione dehydrogenase	m_nad[c] + m_shngthrd[c] <=> m_h[c] + m_nadh[c] + m_sfgthrd[c]	0	0	0	0	0	0	0
r_SHK3D	shikimate dehydrogenase	m_3dhsk[c] + m_h[c] + m_nadph[c] <=> m_nadp[c] + m_skm[c]	0.044997	0.044997	0.044997	0.044997	0.044997	0.044997	0.044997
r_SHKK	shikimate kinase	m_atp[c] + m_skm[c] -> m_adp[c] + m_h[c] + m_skm5p[c]	0.044997	0.044997	0.044997	0.044997	0.044997	0.044997	0.044997
r_SO4T2	sulfate transport in via proton symport	m_h[e] + m_so4[e] -> m_h[c] + m_so4[c]	0.0174054	0	0.0174054	0.0174054	0	0	0
r_SOD	superoxide dismutase	2 m_h[c] + 2 m_o2_[c] -> m_h2o2[c] + m_o2[c]	0	0	0	0	0	0	0
r_SPA	serine pyruvate aminotransferase	m_pyr[c] + m_ser_l[c] -> m_ala_l[c] + m_hpyr[c]	0	0	0	0	0	0	0
r_SPMS	spermidine synthase	m_ametam[c] + m_ptrc[c] -> m_5mta[c] + m_h[c] + m_spmd[c]	0	0	0	0	0	0	0
r_SPS	sucrose phosphate synthase	m_f6p[c] + m_udpg[c] <=> m_h[c] + m_suc6p[c] + m_udp[c]	0	0	0	0	0	0	0
r_SQT_SYN	UDP sulfoquinovose diacylglycerol alpha D sulfoquinovosyltransferase Cyanothece	0.02 m_12dgr_syn[c] + m_udpsq[c] <=> m_h[c] + 0.02 m_sqdg_syn[c] + m_udp[c]	0.0008034	0.0008034	0.0008034	0.0008034	0.0008034	0.0008034	0.0008034
r_SSALY	succinate semialdehyde dehydrogenase NADP	m_h2o[c] + m_nadp[c] + m_sucsal[c] -> 2 m_h[c] + m_nadph[c] + m_succ[c]	0	0	0	0	0	0	0.0771781
r_SUCBZL	o succinylbenzoate CoA ligase	m_atp[c] + m_coa[c] + m_sucbz[c] -> m_amp[c] + m_ppi[c] + m_sbzcoa[c]	0	0	0	0	0	0	0
r_SUCBZS	O succinylbenzoate CoA synthase	m_2shchc[c] -> m_h2o[c] + m_sucbz[c]	0	0	0	0	0	0	0
r_SUCCT2B	Succinate efflux via proton symport	m_h[c] + m_succ[c] -> m_h[e] + m_succ[e]	0	0	0	0	0	0	0
r_SUCD1I	succinate dehydrogenase	m_fad[c] + m_succ[c] -> m_fadh2[c] + m_fum[c]	0.001051	0.001051	0.001051	0.001051	0.001051	0.001051	0.0782291
r_SUCOAS	succinyl CoA synthetase ADP forming	m_atp[c] + m_coa[c] + m_succ[c] <=> m_adp[c] + m_pi[c] + m_succoa[c]	9.4e-05	9.4e-05	9.4e-05	9.4e-05	9.4e-05	9.4e-05	9.4e-05
r_SUCPPT	sucrose phosphate phosphatase	m_h2o[c] + m_suc6p[c] -> m_pi[c] + m_suc[c]	0	0	0	0	0	0	0
r_SUCPR	sucrose phosphorylase	m_pi[c] + m_suc[c] <=> m_fru[c] + m_g1p[c]	0	0	0	0	0	0	0
r_SUC_PQ	Succinate dehydrogenase plastoquinone	m_fadh2[c] + m_pq9[c] -> m_fad[c] + m_pq9h2[c]	0.001051	0.001051	0.001051	0.001051	0.001051	0.001051	0.0782291
r_SULABC	sulfate transport via ABC system	m_atp[c] + m_h2o[c] + m_so4[e] -> m_adp[c] + m_h[c] + m_pi[c] + m_so4[c]	0	0.0174054	0	0	0.0174054	0.0174054	0.0174054
r_TAL	transaldolase	m_g3p[c] + m_s7p[c] <=> m_e4p[c] + m_f6p[c]	0	0	0	0	0	0	0
r_TDMAT6	Tetradecanoyl acyl carrier protein malonyl CoA C acyltransferase	m_h[c] + m_nadh[c] + m_tdeacp[c] -> m_myrsacp[c] + m_nad[c]	0.0156	0.0156	0.0156	0.0156	0.0156	0.0156	0.0156
r_TDPGDH	dTDPglucose 4 6 dehydratase	m_dtdpglc[c] -> m_dtdpddg[c] + m_h2o[c]	0	0	0	0	0	0	0
r_THD2	NAD P transhydrogenase	2 m_h[e] + m_nadh[c] + m_nadp[c] -> 2 m_h[c] + m_nad[c] + m_nadph[c]	0	0	0	0	0.36325	0.359354	0.727657
r_THD5	NAD transhydrogenase	m_nad[c] + m_nadph[c] -> m_nadh[c] + m_nadp[c]	0	0	0	0	0	0	0
r_THFAT	tetrahydrofolate aminomethyltransferase	m_h2o[c] + m_methf[c] -> m_5fothf[c] + m_h[c]	0	0	0	0	0	0	0
r_THPDH	NAD dependent threonine 4 phosphate dehydrogenase	m_nad[c] + m_phthr[c] -> m_amopbut_l[c] + m_h[c] + m_nadh[c]	0	0	0	0	0	0	0
r_THRD_L	L threonine deaminase	m_thr_l[c] -> m_2obut[c] + m_nh4[c]	0.033284	0.033284	0.033284	0.033284	0.033284	0.033284	0
r_THRS	threonine synthase	m_h2o[c] + m_phom[c] -> m_pi[c] + m_thr_l[c]	0.064024	0.064024	0.064024	0.064024	0.064024	0.064024	0.03074
r_THRTRS	Threonyl tRNA synthetase	m_atp[c] + m_thr_l[c] + m_trnathr[c] -> m_amp[c] + m_ppi[c] + m_thrtrna[c]	0.03074	0.03074	0.03074	0.03074	0.03074	0.03074	0.03074
r_TKT1	transketolase	m_r5p[c] + m_xu5p_d[c] <=> m_g3p[c] + m_s7p[c]	-1.96881	-1.96881	-1.3808	-1.3808	-1.3808	-1.3808	-0.0803429
r_TKT2	transketolase	m_e4p[c] + m_xu5p_d[c] <=> m_f6p[c] + m_g3p[c]	-2.01381	-2.01381	-1.42579	-1.42579	-1.42579	-1.42579	-0.12534
r_TMDS	thymidylate synthase	m_dump[c] + m_mlthf[c] -> m_dhf[c] + m_dtmp[c]	0.000286	0.000286	0.000286	0.000286	0.000286	0.000286	0.000286
r_TMPKR	thiamine phosphate kinase	m_atp[c] + m_thmmp[c] <=> m_adp[c] + m_thmpp[c]	0	0	0	0	0	0	0
r_TMPPP	thiamine phosphate diphosphorylase	m_2mahmp[c] + m_4mpetz[c] + m_h[c] -> m_ppi[c] + m_thmmp[c]	0	0	0	0	0	0	0
r_TPI	triose phosphate isomerase	m_dhap[c] <=> m_g3p[c]	-4.37352	-4.37352	-2.90349	-2.90349	-2.90349	-2.90349	-0.302579
r_TRDR	thioredoxin reductase NADPH	m_h[c] + m_nadph[c] + m_trdox[c] -> m_nadp[c] + m_trdrd[c]	0.0185054	0.0185054	0.0185054	0.0185054	0.0185054	0.0185054	0.0185054
r_TRE6PS	alpha alpha trehalose phosphate synthase UDP forming	m_g6p[c] + m_udpg[c] -> m_h[c] + m_tre6p[c] + m_udp[c]	0	0	0	0	0	0	0
r_TRIA	membrane alanyl aminopeptidase	m_cgly[c] + m_h2o[c] <=> m_cys_l[c] + m_gly[c]	0	0	0	0	0	0	0
r_TRPS1	tryptophan synthase indoleglycerol phosphate	m_3ig3p[c] + m_ser_l[c] -> m_g3p[c] + m_h2o[c] + m_trp_l[c]	0.007897	0.007897	0.007897	0.007897	0.007897	0.007897	0.007897
r_TRPTRS	Tryptophanyl tRNA synthetase	m_atp[c] + m_trnatrp[c] + m_trp_l[c] -> m_amp[c] + m_ppi[c] + m_trptrna[c]	0.007897	0.007897	0.007897	0.007897	0.007897	0.007897	0.007897
r_TYRTA	tyrosine transaminase	m_akg[c] + m_tyr_l[c] <=> m_34hpp[c] + m_glu_l[c]	-0.015582	-0.015582	-0.015582	-0.015582	-0.015582	-0.015582	-0.015582
r_TYRTRS	Tyrosyl tRNA synthetase	m_atp[c] + m_trnatyr[c] + m_tyr_l[c] -> m_amp[c] + m_ppi[c] + m_tyrtrna[c]	0.015582	0.015582	0.015582	0.015582	0.015582	0.015582	0.015582
r_UAAGDS	UDP N acetylmuramoyl L alanyl D glutamyl meso 2 6 diaminopimelate synthetase	m_26dap_m[c] + m_atp[c] + m_uamag[c] -> m_adp[c] + m_h[c] + m_pi[c] + m_ugmd[c]	0	0	0	0	0	0	0
r_UACAT	acyl acyl carrier protein UDP N acetylglucosamine O acyltransferase	m_3htdacp[c] + m_uacgam[c] -> m_acp[c] + m_u3aga[c]	0	0	0	0	0	0	0
r_UAG2E	UDP N acetylglucosamine 2 epimerase	m_uacgam[c] <=> m_uacmam[c]	0	0	0	0	0	0	0
r_UAGCVT	UDP N acetylglucosamine 1 carboxyvinyltransferase	m_pep[c] + m_uacgam[c] -> m_pi[c] + m_uaccg[c]	0	0	0	0	0	0	0
r_UAGDPR	UDP N acetylglucosamine diphosphorylase	m_acgam1p[c] + m_h[c] + m_utp[c] <=> m_ppi[c] + m_uacgam[c]	0	0	0	0	0	0	0
r_UAGPT3	UDP N acetylglucosamine N acetylmuramyl pentapeptidepyrophosphoryl undecaprenol N acetylglucosamine transferase	m_uacgam[c] + m_uagmda[c] -> m_h[c] + m_uaagmda[c] + m_udp[c]	0	0	0	0	0	0	0
r_UAMAGS	UDP N acetylmuramoyl L alanyl D glutamate synthetase	m_atp[c] + m_glu_d[c] + m_uama[c] -> m_adp[c] + m_h[c] + m_pi[c] + m_uamag[c]	0	0	0	0	0	0	0
r_UAMAS	UDP N acetylmuramoyl L alanine synthetase	m_ala_l[c] + m_atp[c] + m_uamr[c] -> m_adp[c] + m_h[c] + m_pi[c] + m_uama[c]	0	0	0	0	0	0	0
r_UAPGR	UDP N acetylenolpyruvoylglucosamine reductase	m_h[c] + m_nadph[c] + m_uaccg[c] -> m_nadp[c] + m_uamr[c]	0	0	0	0	0	0	0
r_UDCPD	undecaprenyl diphosphatase	m_h2o[c] + m_udcpdp[c] -> m_h[c] + m_pi[c] + m_udcpp[c]	0	0	0	0	0	0	0
r_UDP6GSH	UDP 6 sulfo 6 deoxyglucose sulfohydrolase	m_h[c] + m_so3[c] + m_udpg[c] <=> m_h2o[c] + m_udpsq[c]	0.0008034	0.0008034	0.0008034	0.0008034	0.0008034	0.0008034	0.0008034
r_UDPG4E	UDPglucose 4 epimerase	m_udpg[c] <=> m_udpgal[c]	0.000975	0.000975	0.000975	0.000975	0.000975	0.000975	0.000975
r_UDPGD	UDPglucose 6 dehydrogenase	m_h2o[c] + 2 m_nad[c] + m_udpg[c] <=> 3 m_h[c] + 2 m_nadh[c] + m_udpglcur[c]	0	0	0	0	0	0	0
r_UGMDDS	UDP N acetylmuramoyl L alanyl D glutamyl meso 2 6 diaminopimeloyl D alanyl D alanine synthetase	m_alaala[c] + m_atp[c] + m_ugmd[c] -> m_adp[c] + m_h[c] + m_pi[c] + m_ugmda[c]	0	0	0	0	0	0	0
r_UGSAT	UDP 2 3 bis 3 hydroxytetradecanoylglucosamine acyl transferase	m_acp[c] + m_h[c] + m_u23ga[c] <=> m_3htdacp[c] + m_u3hga[c]	0	0	0	0	0	0	0
r_UHGADA	UDP 3 0 acyl N acetylglucosamine deacetylase	m_h2o[c] + m_u3aga[c] -> m_ac[c] + m_u3hga[c]	0	0	0	0	0	0	0
r_UPP3MT	uroporphyrinogen methyltransferase	2 m_amet[c] + m_uppg3[c] -> 2 m_ahcys[c] + 2 m_h[c] + m_shcl[c]	0	0	0	0	0	0	0
r_UPP3S	uroporphyrinogen III synthase	m_hmbil[c] -> m_h2o[c] + m_uppg3[c]	0.002304	0.002304	0.002304	0.002304	0.002304	0.002304	0.002304
r_UPPDC1	uroporphyrinogen decarboxylase uroporphyrinogen III	4 m_h[c] + m_uppg3[c] -> 4 m_co2[c] + m_cpppg3[c]	0.002304	0.002304	0.002304	0.002304	0.002304	0.002304	0.002304
r_UPPRT	uracil phosphoribosyltransferase	m_prpp[c] + m_ura[c] -> m_ppi[c] + m_ump[c]	0	0	0	0	0	0	0
r_UREASE	urea carboxylase	2 m_h[c] + m_h2o[c] + m_urea[c] -> m_co2[c] + 2 m_nh4[c]	0	0	0	0.396659	0	0	0
r_UREATABC	Urea transport via ATP	m_atp[c] + m_urea[e] -> m_adp[c] + m_pi[c] + m_urea[c]	0	0	0	0.396659	0	0	0
r_URIDK1	uridylate kinase UMP	m_atp[c] + m_ump[c] -> m_adp[c] + m_udp[c]	0.0072252	0.0072252	0.0072252	0.0072252	0.0072252	0.0072252	0.0072252
r_URIDK2	uridylate kinase dUMP	m_atp[c] + m_dump[c] -> m_adp[c] + m_dudp[c]	0	0	0	0	0	0	0
r_VALABC	L valine transport via ABC system	m_atp[c] + m_h2o[c] + m_val_l[e] -> m_adp[c] + m_h[c] + m_pi[c] + m_val_l[c]	0	0	0	0	0	0	0
r_VALTA	valine transaminase	m_akg[c] + m_val_l[c] <=> m_3mob[c] + m_glu_l[c]	-0.033814	-0.033814	-0.033814	-0.033814	-0.033814	-0.033814	0
r_VALTRS	Valyl tRNA synthetase	m_atp[c] + m_trnaval[c] + m_val_l[c] -> m_amp[c] + m_ppi[c] + m_valtrna[c]	0.033814	0.033814	0.033814	0.033814	0.033814	0.033814	0.033814
r_VPAMT	Valine pyruvate aminotransferase	m_3mob[c] + m_ala_l[c] -> m_pyr[c] + m_val_l[c]	0	0	0	0	0	0	0.033814
r_VTE1A	tocopherol cyclase	m_dmptq[c] -> m_gtcph[c]	0	0	0	0	0	0	0
r_VTE1B	tocopherol cyclase	m_mtpq[c] -> m_dtcph[c]	0	0	0	0	0	0	0
r_XTPASE	XTP pyrophosphatase	m_h2o[c] + m_xtp[c] -> m_h[c] + m_ppi[c] + m_xmp[c]	0	0	0	0	0	0	0
r_ZCARODS	carotene desaturase	m_h[c] + m_nadh[c] + m_o2[c] + m_zcar[c] -> 2 m_h2o[c] + m_nad[c] + m_nspr[c]	0	0	0	0	0	0	0
r_ZCARODS1	carotene desaturase nadp dependent	m_h[c] + m_nadph[c] + m_o2[c] + m_zcar[c] -> 2 m_h2o[c] + m_nadp[c] + m_nspr[c]	0	0	0	0	0	0	0
r_ZN2ABC2	zinc transport in via ABC system	m_atp[c] + m_h2o[c] + m_zn2[e] -> m_adp[c] + m_h[c] + m_pi[c] + m_zn2[c]	0	0	0	0	0	0	0
r_GLYCGNT	r_GLYCGNT	m_glycogen[c] <=> m_glycogen[e]	0.370868	0.370868	0.076861	0.076861	0.076861	0.076861	0.076861
r_EX_GLYCGN_E	r_EX_GLYCGN_E	m_glycogen[e] <=>	0.370868	0.370868	0.076861	0.076861	0.076861	0.076861	0.076861

## Sheet: Dataset S2
Functional enrichment analysis (Group 1)
MainRole	PVal	Ratio	% In Module	% In Genome
Transport and binding proteins	0.0368883	1.38996	12.7072	9.14214
Carbohydrate metabolism	1.63729e-14	4.7344	12.1547	2.56731
Energy metabolism	3.50371e-10	2.70389	15.7459	5.82342
Prosthetic groups, cofactors, and carriers	1.76235e-18	3.87083	18.7845	4.85285
Glycan biosynthesis and metabolism	0.0034619	2.26882	4.97238	2.19161
Amino acid metabolism	5.30919e-08	3.15114	9.66851	3.06825
Metabolism of other amino acids and amines	0.000113737	7.84285	2.20994	0.281778
Subrole	PVal	Ratio	% In Module	% In Genome
Cations and iron carrying compounds	1.14879e-07	3.3356	8.56354	2.56731
Amino sugar and nucleotide sugar metabolism	7.70909e-06	7.46579	3.03867	0.407013
Fructose and mannose metabolism	0.00530091	8.8232	1.10497	0.125235
Detoxification and inactivation	0.00414291	2.71483	3.31492	1.22104
Carbon fixation in prokaryotes	0.00126378	4.17941	2.48619	0.594865
Thiamine metabolism	0.00292419	7.35267	1.38122	0.187852
Porphyrin and chlorophyll metabolism	0.00184233	2.745	3.8674	1.40889
Glycolysis / Gluconeogenesis	0.0269666	4.4116	1.10497	0.25047
Starch and sucrose metabolism	0.000945766	5.04183	2.20994	0.438322
Peptidoglycan metabolism	0.000357239	3.58443	3.59116	1.00188
Biotin and lipoate metabolism	0.0269666	4.4116	1.10497	0.25047
"Glycine, serine and threonine metabolism"	0.00240428	5.88214	1.65746	0.281778
Vitamin B6 metabolism	0.0268103	6.6174	0.828729	0.125235
Cysteine and methionine metabolism	0.00182049	5.14687	1.9337	0.375704
Pentose phosphate pathway	0.000194849	8.8232	1.9337	0.219161
Riboflavin metabolism	0.000984097	7.56275	1.65746	0.219161
Pyrimidine metabolism	0.00671498	3.36122	2.20994	0.657483
Electron transport	0.00671498	3.36122	2.20994	0.657483
Oxidative phosphorylation	1.67949e-09	4.86177	7.45856	1.53413
Nicotinate and nicotinamide metabolism	0.0240627	3.11407	1.65746	0.532248
"Alanine, aspartate and glutamate metabolism"	0.0097935	4.90178	1.38122	0.281778
Ubiquinone and other terpenoid-quinone biosynthesis	1.29125e-05	5.46198	3.59116	0.657483
Arginine and proline metabolism	0.000257884	4.90178	2.76243	0.563557
Folate biosynthesis	2.63233e-06	8.8232	3.03867	0.344396
RNA polymerase	0.00173889	8.8232	1.38122	0.156544
Glutathione metabolism	0.00878315	7.05856	1.10497	0.156544
Subsystem	PVal	Ratio	% In Module	% In Genome
KDO(2)-lipid A (Re LPS) biosynthesis and delivery	0.00530091	8.8232	1.10497	0.125235
Embden-Meyerhof pathway	0.0134793	5.88214	1.10497	0.187852
biotin biosynthesis	0.00530091	8.8232	1.10497	0.125235
threonine biosynthesis from homoserine	0.0165546	8.8232	0.828729	0.0939261
glycogen metabolism	0.00878315	7.05856	1.10497	0.156544
peptidoglycan biosynthesis	9.57855e-05	5.10817	3.03867	0.594865
"riboflavin, FAD and FMN from GTP and ribulose-5-P"	0.00530091	8.8232	1.10497	0.125235
photosystem II main subunits	0.0097935	4.90178	1.38122	0.281778
"alkene biosynthesis (1-nonadecene and 1,14-nonadecadiene)"	0.039716	5.29392	0.828729	0.156544
photosynthetic electron transport	0.0097935	4.90178	1.38122	0.281778
NAD(P)H:quinone oxidoreductase (complex I) NdhABCDEFGHIJKLMNOPQS	0.0125509	2.94107	2.20994	0.751409
"pentose phosphate pathway, oxidative phase"	0.0165546	8.8232	0.828729	0.0939261
phylloquinone biosynthesis via SEPHCHC	0.000113737	7.84285	2.20994	0.281778
tetrahydrofolate biosynthesis from GTP and PABA	0.000579139	8.8232	1.65746	0.187852
glycine cleavage system GcvHLPT	0.0165546	8.8232	0.828729	0.0939261
UDP-N-acetylglucosamine biosynthesis from fructose-6-phosphate	0.0165546	8.8232	0.828729	0.0939261
lycopene biosynthesis from isopentyl pyrophosphate (IPP)	0.0134793	5.88214	1.10497	0.187852
uridine monophosphate biosynthesis from glutamine	0.00352174	5.29392	1.65746	0.313087
methionine salvage from methylthioadenosine	0.0165546	8.8232	0.828729	0.0939261
RNA polymerase RpoABCEZ	0.00173889	8.8232	1.38122	0.156544
Tocopherol biosynthesis	0.00530091	8.8232	1.10497	0.125235
heme-copper quinol oxidase CtaCDE	0.0165546	8.8232	0.828729	0.0939261
F1/F0 ATPase AtpABCDEFGH	0.000186741	7.05856	2.20994	0.313087
phosphate signalling cascade PhoBRU-PstABCS	0.0134793	5.88214	1.10497	0.187852
iron (III) transport system AfuABC	0.0165546	8.8232	0.828729	0.0939261
sucrose biosynthesis	0.0165546	8.8232	0.828729	0.0939261
ammonium uptake	0.0165546	8.8232	0.828729	0.0939261
putrescine biosynthesis from arginine utilizing agmatinase	0.0165546	8.8232	0.828729	0.0939261
"cytochrome c oxidase, mitochondrial, caa3-type CoxABCD"	0.0165546	8.8232	0.828729	0.0939261
DNA replication elongation factor; DNA polymerase IIIl	0.00292419	7.35267	1.38122	0.187852
neutral amino acid uptake sysetm NatABCDE	0.00878315	7.05856	1.10497	0.156544
coenzyme B12 biosynthesis from cob(II)yrinate diamide	0.0165546	8.8232	0.828729	0.0939261
manganese uptake system MntABC	0.0165546	8.8232	0.828729	0.0939261
bilin biosynthesis	0.0165546	8.8232	0.828729	0.0939261
glucosylglycerol biosynthesis	0.039716	5.29392	0.828729	0.156544
zinc uptake system ZnuABC	0.0165546	8.8232	0.828729	0.0939261
potassium-transporting ATPase KdpFABC	0.00530091	8.8232	1.10497	0.125235
iron(III) transport system FbpABC	0.0165546	8.8232	0.828729	0.0939261
N-type Na translocation ATPase	2.24815e-05	8.8232	2.48619	0.281778

## Sheet: Dataset S3
Functional enrichment analysis (Group 2)
MainRole	PVal	Ratio	% In Module	% In Genome
Carbohydrate metabolism	2.66829e-08	8.49845	21.8182	2.56731
Energy metabolism	3.70724e-13	6.86882	40	5.82342
Amino acid metabolism	0.0287984	2.96289	9.09091	3.06825
Subrole	PVal	Ratio	% In Module	% In Genome
Carbon fixation in prokaryotes	0.00562976	9.16938	5.45455	0.594865
Glyoxylate and dicarboxylate metabolism	4.94493e-07	48.3939	9.09091	0.187852
"Glycine, serine and threonine metabolism"	0.0140341	12.9051	3.63636	0.281778
Pyruvate metabolism	1.91158e-07	31.676	10.9091	0.344396
Anions	3.78329e-05	10.5587	10.9091	1.03319
Electron transport	0.000714277	11.0615	7.27273	0.657483
Oxidative phosphorylation	3.0408e-14	17.7774	27.2727	1.53413
Nicotinate and nicotinamide metabolism	0.00426839	10.2481	5.45455	0.532248
"Alanine, aspartate and glutamate metabolism"	0.0140341	12.9051	3.63636	0.281778
Subsystem	PVal	Ratio	% In Module	% In Genome
Calvin-Benson cycle; Embden-Meyerhof pathway	0.00559636	23.2291	3.63636	0.156544
photorespiration (oxidative C2 cycle)	2.06135e-06	32.2626	9.09091	0.281778
pyruvate dehydrogenase complex PdhABCD-AceE	4.8974e-06	58.0727	7.27273	0.125235
NAD(P)H:quinone oxidoreductase (complex I) NdhABCDEFGHIJKLMNOPQS	1.44194e-13	29.0364	21.8182	0.751409
nickel-dependent hydrogenase	0.00219971	13.4014	5.45455	0.407013
NAD(P) biosynthesis common pathway	0.00404117	29.0364	3.63636	0.125235
glutamine biosynthesis	0.0499451	29.0364	1.81818	0.0626174
anaplerotic reactions	0.00272365	38.7152	3.63636	0.0939261
sulfate uptake system CysAPUW	4.8974e-06	58.0727	7.27273	0.125235
TCA cycle second carbon oxidation	0.00165213	58.0727	3.63636	0.0626174
serine biosynthesis	0.0335751	58.0727	1.81818	0.0313087
polyphosphate kinase/exopolyphosphatase system	0.00272365	38.7152	3.63636	0.0939261
glutamate biosynthesis	0.0499451	29.0364	1.81818	0.0626174
sulfur assimilation	0.0335751	58.0727	1.81818	0.0313087
serine-glycine interconversion	0.0335751	58.0727	1.81818	0.0313087
osmolyte or protein uptake?	8.86083e-05	58.0727	5.45455	0.0939261

## Sheet: Dataset S4
Functional enrichment analysis (Group 3)
MainRole	PVal	Ratio	% In Module	% In Genome
Nucleic acid metabolism	9.42925e-05	2.30248	10.3806	4.50845
Carbohydrate metabolism	0.0146591	2.02169	5.19031	2.56731
Energy metabolism	3.58749e-11	3.03036	17.6471	5.82342
Translation	4.27834e-24	4.64311	24.5675	5.29117
Prosthetic groups, cofactors, and carriers	2.80625e-05	2.35299	11.4187	4.85285
Terpenoids and polyketides metabolism	0.00936047	3.0488	2.76817	0.907952
Fatty acid and lipid metabolism	5.62572e-09	5.80225	7.26644	1.25235
Amino acid metabolism	4.76693e-21	5.86428	17.9931	3.06825
Subrole	PVal	Ratio	% In Module	% In Genome
Purine metabolism	6.90101e-09	7.10479	6.22837	0.876644
Carbon fixation in prokaryotes	0.0435325	2.9084	1.7301	0.594865
Sulfur metabolism	0.00184761	7.89422	1.7301	0.219161
Transfer RNA biogenesis	3.58366e-11	9.20992	6.92042	0.751409
Biosynthesis	6.34171e-06	7.15123	3.80623	0.532248
Porphyrin and chlorophyll metabolism	4.50832e-07	4.66636	6.57439	1.40889
Ribosomal proteins: synthesis and modification	9.14051e-23	7.47171	16.609	2.22292
Lysine biosynthesis	0.000525281	8.28893	2.07612	0.25047
Terpenoid backbone biosynthesis	4.27405e-05	8.84152	2.76817	0.313087
Cysteine and methionine metabolism	0.0380196	3.68397	1.38408	0.375704
Photosynthesis	1.85752e-15	6.55621	12.1107	1.84721
Pyrimidine metabolism	6.15086e-06	6.31537	4.15225	0.657483
Biosynthesis of unsaturated fatty acids	0.0325839	5.52595	1.03806	0.187852
"Phenylalanine, tyrosine and tryptophan biosynthesis"	1.07907e-09	10.4018	5.53633	0.532248
Nitrogen metabolism	0.00184761	7.89422	1.7301	0.219161
Nicotinate and nicotinamide metabolism	0.0308854	3.25056	1.7301	0.532248
"Valine, leucine and isoleucine metabolism"	0.00035998	7.03303	2.42215	0.344396
Arginine and proline metabolism	0.000845837	4.91196	2.76817	0.563557
Pantothenate and CoA biosynthesis	9.05903e-05	9.67042	2.42215	0.25047
Histidine metabolism	4.27405e-05	8.84152	2.76817	0.313087
Glycerolipid and glycerophospholid metabolism	0.00144283	5.15755	2.42215	0.469631
Citrate cycle (TCA cycle)	0.000815075	7.36794	2.07612	0.281778
Aminoacyl-tRNA biosynthesis	0.00935803	11.0519	1.03806	0.0939261
Subsystem	PVal	Ratio	% In Module	% In Genome
purine (inosine-5'-phosphate) biosynthesis from ribose-5-phosphate	1.65833e-07	10.2018	4.15225	0.407013
tRNA aminoacylation	6.89977e-12	10.5256	6.92042	0.657483
acetyl-CoA carboxylase complex	0.00248495	11.0519	1.38408	0.125235
"fatty acid biosynthesis, elongation"	0.00248495	11.0519	1.38408	0.125235
lysine biosynthesis via diaminopimelate (DAP) utilizing ammonia and NADPH	0.0367903	11.0519	0.692042	0.0626174
photosystem II other common subunits	1.65833e-07	10.2018	4.15225	0.407013
pyrimidine deoxyribonucleotide biosynthesis	0.0153799	8.28893	1.03806	0.125235
photosystem II main subunits	0.0181931	4.91196	1.38408	0.281778
chorismate biosynthesis via shikimate	0.000675817	11.0519	1.7301	0.156544
urease	0.00935803	11.0519	1.03806	0.0939261
chlorophyllide a biosynthesis from protoporphyrin IX	0.000815075	7.36794	2.07612	0.281778
branched chain amino acid biosynthesis	0.00184761	7.89422	1.7301	0.219161
guanine ribonucleotide biosynthesis from IMP	0.00935803	11.0519	1.03806	0.0939261
tryptophan biosynthesis from chorismate	0.0153799	8.28893	1.03806	0.125235
NAD(P) biosynthesis from L-aspartate and DHAP	0.00935803	11.0519	1.03806	0.0939261
"ornithine biosynthesis from glutamate, acetylated branch"	0.0153799	8.28893	1.03806	0.125235
pantothenate biosynthesis from aspartate and 2-oxoisovalerate	0.00935803	11.0519	1.03806	0.0939261
plastoquinol用lastocyanin reductase (cytochrome b6-f complex)	0.00772447	5.02359	1.7301	0.344396
ribosome small subunit	6.89977e-12	10.5256	6.92042	0.657483
high affinity urea uptake system UrtABCDE	0.000675817	11.0519	1.7301	0.156544
leucine and isoleucine biosynthesis from pyruvate and acetyl-CoA	0.0367903	11.0519	0.692042	0.0626174
histidine biosynthesis	0.0367903	11.0519	0.692042	0.0626174
ribosome large subunit	8.66883e-15	9.32504	9.34256	1.00188
histidine biosynthesis from ribose-5-phosphate	5.19785e-05	11.0519	2.42215	0.219161
IPP biosynthesis via deoxyxylulose	5.19785e-05	11.0519	2.42215	0.219161
phosphatidylglycerol biosynthesis	0.0325839	5.52595	1.03806	0.187852
uridine monophosphate biosynthesis from glutamine	0.0238443	4.42076	1.38408	0.313087
chlorophyll biosynthesis from chlorophyllide a	0.0367903	11.0519	0.692042	0.0626174
tryptophan biosynthesis from ribose-5-phosphate	0.00935803	11.0519	1.03806	0.0939261
"arginine biosynthesis from ornithine, carbamoyl-p, and aspartate (urea cycle)"	0.00935803	11.0519	1.03806	0.0939261
photosystem I main subunits	0.000186526	11.0519	2.07612	0.187852
"sulfate reduction to sulfide, assimilatory"	0.0153799	8.28893	1.03806	0.125235
adenosine monophosphate (AMP) biosynthesis from inosine monophosphate (IMP)	0.00935803	11.0519	1.03806	0.0939261
"citrate cycle, first carbon oxidation"	0.00935803	11.0519	1.03806	0.0939261
NAD(P) biosynthesis common pathway from nicotinic acid mononucleotide route 1	0.0367903	11.0519	0.692042	0.0626174
lysine biosynthesis via diaminopimelate (DAP)	0.0153799	8.28893	1.03806	0.125235
"citrate cycle, second carbon oxidation"	0.0153799	8.28893	1.03806	0.125235
photosystem I other common subunits	0.00248495	11.0519	1.38408	0.125235
Calvin-Benson cycle; Pentose phosphate pathway	0.0367903	11.0519	0.692042	0.0626174
GatABC aspartyl/glutamyl-tRNA(Asn/Gln) amidotransferase complex	0.00935803	11.0519	1.03806	0.0939261
5-aminolevulinate biosynthesis (glutamate pathway)	0.0367903	11.0519	0.692042	0.0626174
coenzyme A biosynthesis from pantothenate	0.0153799	8.28893	1.03806	0.125235
light-independent protochlorophyllide reductase	0.0153799	8.28893	1.03806	0.125235
methionine degradation	0.0367903	11.0519	0.692042	0.0626174
chorismate from erythrose-4P	0.0367903	11.0519	0.692042	0.0626174

## Sheet: Dataset S5
Both TI and FI genes (FT)
Locus Tag	Main_Role	Subrole	Subsystem	Curated Product Descriptor	Gene
7002_A1054	Translation	Ribosomal proteins: synthesis and modification	ribosome large subunit	LSU ribosomal protein L24 RplX	rplX
7002_A1055	Translation	Ribosomal proteins: synthesis and modification	ribosome large subunit	LSU ribosomal protein L14 RplN	rplN
7002_A1065	Translation	Ribosomal proteins: synthesis and modification	ribosome large subunit	LSU ribosomal protein L3 RplC	rplC
7002_A1058	Translation	Ribosomal proteins: synthesis and modification	ribosome large subunit	LSU ribosomal protein L16 RplP	rplP
7002_A1064	Translation	Ribosomal proteins: synthesis and modification	ribosome large subunit	LSU ribosomal protein L4 RplD	rplD
7002_A1049	Translation	Ribosomal proteins: synthesis and modification	ribosome small subunit	SSU ribosomal protein S5 RpsE	rpsE
7002_A1052	Translation	Ribosomal proteins: synthesis and modification	ribosome small subunit	SSU ribosomal protein S8 RpsH	rpsH
7002_A1051	Translation	Ribosomal proteins: synthesis and modification	ribosome large subunit	LSU ribosomal protein L6 RplF	rplF
7002_A1024	Fatty acid and lipid metabolism	Biosynthesis	fatty acid biosynthesis from acetyl-CoA	acyl carrier protein AcpP	acpP
7002_A1056	Translation	Ribosomal proteins: synthesis and modification	ribosome small subunit	SSU ribosomal protein S17 RpsQ	rpsQ
7002_A1060	Translation	Ribosomal proteins: synthesis and modification	ribosome large subunit	LSU ribosomal protein L22 RplV	rplV
7002_A2060	Translation	Ribosomal proteins: synthesis and modification	ribosome small subunit	SSU ribosomal protein S10 RpsJ	rpsJ
7002_A1026	Translation	Ribosomal proteins: synthesis and modification	ribosome large subunit	LSU ribosomal protein L7/L12 RplL	rplL
7002_A1061	Translation	Ribosomal proteins: synthesis and modification	ribosome small subunit	SSU ribosomal protein S19 RpsS	rpsS
TI but not FI genes (Tf)
Locus Tag	Main_Role	Subrole	Subsystem	Curated Product Descriptor	Gene
7002_A0734	Energy metabolism	Oxidative phosphorylation	F1/F0 ATPase AtpABCDEFGH	F1 ATP synthase complex alpha subunit AtpA	atpA
FI but not TI genes (Ft)
Locus Tag	Main Role	Subrole	Subsystem	Product	Gene
7002_A0007	Nucleic acid metabolism	Purine metabolism	purine (inosine-5'-phosphate) biosynthesis from ribose-5-phosphate	phosphoribosylglycinamide formyltransferase 1 PurN	purN
7002_A0035	Translation	Transfer RNA biogenesis	tRNA aminoacylation	class II lysyl-tRNA synthetase LysS	lysS
7002_A0037	Translation	Transfer RNA biogenesis	tRNA aminoacylation	tryptophanyl-tRNA synthetase TrpS	trpS
7002_A0038	Prosthetic groups_ cofactors_ and carriers	One carbon pool by folate		5_ 10-methylenetetrahydrofolate reductase MetF	metF
7002_A0052	Fatty acid and lipid metabolism	Biosynthesis	acetyl-CoA carboxylase complex	acetyl-CoA carboxylase complex biotin carboxyl carrier protein AccB	accB
7002_A0070	Fatty acid and lipid metabolism	Biosynthesis	fatty acid biosynthesis_ elongation	beta-hydroxyacyl-(acyl-carrier-protein) dehydratase FabZ	fabZ
7002_A0095	Carbohydrate metabolism	Starch and sucrose metabolism	glycogen metabolism	glucose-1-phosphate adenylyltransferase GlgC	glgC
7002_A0097	Amino acid metabolism	Lysine biosynthesis	lysine biosynthesis via diaminopimelate (DAP) utilizing ammonia and NADPH	diaminopimelate decarboxylase LysA	lysA
7002_A0110	Carbohydrate metabolism	Pyruvate metabolism	pyruvate dehydrogenase complex PdhABCD-AceE	pyruvate dehydrogenase dihydrolipoamide acetyltransferase E2 component PdhC	pdhC
7002_A0112	Energy metabolism	Photosynthesis	photosystem II other subunits in cyanobacteria	photosystem II cytochrome c550 PsbV	psbV
7002_A0135	Energy metabolism	Photosynthesis	photosystem II other common subunits	photosystem II reaction center protein PsbZ	psbZ
7002_A0155	Nucleic acid metabolism	Pyrimidine metabolism	pyrimidine deoxyribonucleotide biosynthesis	deoxyuridine 5'-triphosphate nucleotidohydrolase Dut	dut
7002_A0159	Fatty acid and lipid metabolism	Biosynthesis of unsaturated fatty acids	alkene biosynthesis (1-nonadecene and 1_14-nonadecadiene)	omega-3 acyl-lipid desaturase DesB	desB
7002_A0169	Amino acid metabolism	Phenylalanine_ tyrosine and tryptophan biosynthesis	chorismate biosynthesis via shikimate	3-phosphoshikimate 1-carboxyvinyltransferase AroA	aroA
7002_A0177	Carbohydrate metabolism	Glyoxylate and dicarboxylate metabolism	photorespiration (oxidative C2 cycle)	alanine-glyoxylate transaminase / serine-glyoxylate transaminase / serine-pyruvate transaminase AgxT	agxT
7002_A0193	Energy metabolism	Nitrogen metabolism	urease	urease alpha subunit UreC	ureC
7002_A0197	Energy metabolism	Electron transport	nickel-dependent hydrogenase	NAD-reducing hydrogenase subunit HoxU	hoxU
7002_A0210	Prosthetic groups_ cofactors_ and carriers	Porphyrin and chlorophyll metabolism	chlorophyllide a biosynthesis from protoporphyrin IX	light-dependent protochlorophyllide oxidoreductase Por	por
7002_A0230	Energy metabolism	Photosynthesis	photosystem II main subunits	photosystem II cytochrome b559 alpha subunit PsbE	psbE
7002_A0266	Nucleic acid metabolism	Purine metabolism	guanine ribonucleotide biosynthesis from IMP	inosine-5'-monophosphate dehydrogenase catalytic subunit GuaB	guaB
7002_A0296	Amino acid metabolism	Phenylalanine_ tyrosine and tryptophan biosynthesis	tryptophan biosynthesis from chorismate	tryptophan synthase beta subunit TrpB	trpB
7002_A0301	Prosthetic groups_ cofactors_ and carriers	Nicotinate and nicotinamide metabolism	NAD(P) biosynthesis from L-aspartate and DHAP	L-aspartate oxidase NadB	nadB
7002_A0316	Prosthetic groups_ cofactors_ and carriers	Pantothenate and CoA biosynthesis	coenzyme A biosynthesis from panthenate	pantetheine-phosphate adenylyltransferase CoaD	coaD
7002_A0317	Nucleic acid metabolism	Purine metabolism	purine (inosine-5'-phosphate) biosynthesis from ribose-5-phosphate	phosphoribosylaminoimidazole-succinocarboxamide synthase PurC	purC
7002_A0322	Energy metabolism	Photosynthesis	photosystem II other subunits in cyanobacteria	photosystem II protein PsbU	psbU
7002_A0343	Prosthetic groups_ cofactors_ and carriers	Pantothenate and CoA biosynthesis	pantothenate biosynthesis from aspartate and 2-oxoisovalerate	bifunctional pantoate ligase / cytidylate kinase PanC-cmk	panC-cmk
7002_A0345	Nucleic acid metabolism	Purine metabolism	purine (inosine-5'-phosphate) biosynthesis from ribose-5-phosphate	phosphoribosylformylglycinamidine cyclo-ligase PurM	purM
7002_A0353	Carbohydrate metabolism	Pyruvate metabolism	pyruvate dehydrogenase complex PdhABCD-AceE	pyruvate dehydrogenase E1 component alpha subunit PdhA	pdhA
7002_A0366	Prosthetic groups_ cofactors_ and carriers	Nicotinate and nicotinamide metabolism	NAD(P) biosynthesis from L-aspartate and DHAP	nicotinate-nucleotide pyrophosphorylase (carboxylating) NadC	nadC
7002_A0382	Nucleic acid metabolism	Pyrimidine metabolism	pyrimidine deoxyribonucleotide biosynthesis	ribonucleoside-diphosphate reductase beta subunit NrdB	nrdB
7002_A0387	Translation	Transfer RNA biogenesis	tRNA aminoacylation	glycyl-tRNA synthetase alpha subunit GlyQ	glyQ
7002_A0391	Translation	Ribosomal proteins: synthesis and modification	ribosome small subunit	SSU ribosomal protein S14 RpsN	rpsN
7002_A0422	Translation	Transfer RNA biogenesis	tRNA aminoacylation	aspartyl-tRNA synthetase AspS	aspS
7002_A0443	Translation	Ribosomal proteins: synthesis and modification	ribosome small subunit	SSU ribosomal protein S6 RpsF	rpsF
7002_A0447	Translation	Transfer RNA biogenesis	tRNA aminoacylation	phenylalanyl-tRNA synthetase beta subunit PheT	pheT
7002_A0448	Carbohydrate metabolism	Pyruvate metabolism	anaplerotic reactions	oxaloacetate decarboxylating malate dehydrogenase MaeA	maeA
7002_A0488	Amino acid metabolism	Histidine metabolism	histidine biosynthesis	bifunctional phosphoribosyl-ATP pyrophosphohydrolase / phosphoribosyl-AMP cyclohydrolase HisIE	hisIE
7002_A0489	Translation	Ribosomal proteins: synthesis and modification	ribosome large subunit	LSU ribosomal protein L27 RpmA	rpmA
7002_A0490	Translation	Ribosomal proteins: synthesis and modification	ribosome large subunit	LSU ribosomal protein L21 RplU	rplU
7002_A0493	Translation	Transfer RNA biogenesis	tRNA aminoacylation	phenylalanyl-tRNA synthetase alpha subunit PheS	pheS
7002_A0517	Terpenoids and polyketides metabolism	Terpenoid backbone biosynthesis	IPP biosynthesis via deoxyxylulose	4-hydroxy-3-methylbut-2-enyl diphosphate reductase IspH	ispH
7002_A0521	Fatty acid and lipid metabolism	Glycerolipid and glycerophospholid metabolism	phosphatidylglycerol biosynthesis	membrane phosphatidylglycerophosphatase PgpB	pgpB
7002_A0526	Fatty acid and lipid metabolism	Glycerolipid and glycerophospholid metabolism	1-acylglycerol-3-phosphate biosynthesis_ PlsX/Y pathway	glycerol-3-phosphate acyltransferase PlsX	plsX
7002_A0533	Fatty acid and lipid metabolism	Glycerolipid and glycerophospholid metabolism	glycerolipid biosynthesis	monoglucosyldiacylglycerol synthase MgdA	mgdA
7002_A0547	Nucleic acid metabolism	Pyrimidine metabolism	uridine monophosphate biosynthesis from glutamine	orotidine 5'-phosphate decarboxylase PyrF	pyrF
7002_A0548	Prosthetic groups_ cofactors_ and carriers	Porphyrin and chlorophyll metabolism	chlorophyll biosynthesis from chlorophyllide a	chlorophyll synthase BchG	bchG
7002_A0550	Nucleic acid metabolism	Purine metabolism	purine (inosine-5'-phosphate) biosynthesis from ribose-5-phosphate	amidophosphoribosyltransferase PurF	purF
7002_A0560	Energy metabolism	Oxidative phosphorylation	NAD(P)H:quinone oxidoreductase (complex I) NdhABCDEFGHIJKLMNOPQS	NADH-plastoquinone oxidoreductase subunit NdhL	ndhL
7002_A0562	Amino acid metabolism	Phenylalanine_ tyrosine and tryptophan biosynthesis	tryptophan biosynthesis from ribose-5-phosphate	tryptophan synthase alpha subunit TrpA	trpA
7002_A0569	Energy metabolism	Oxidative phosphorylation	NAD(P)H:quinone oxidoreductase (complex I) NdhABCDEFGHIJKLMNOPQS	NADH-plastoquinone oxidoreductase subunit NdhM	ndhM
7002_A0573	Translation	Ribosomal proteins: synthesis and modification	ribosome small subunit	SSU ribosomal protein S18 RpsR	rpsR
7002_A0595	Carbohydrate metabolism	Glycolysis / Gluconeogenesis	Embden-Meyerhof pathway	triosephosphate isomerase TpiA	tpiA
7002_A0599	Translation	Transfer RNA biogenesis	tRNA aminoacylation	arginyl-tRNA synthetase ArgS	argS
7002_A0606	Nucleic acid metabolism	Purine metabolism	purine (inosine-5'-phosphate) biosynthesis from ribose-5-phosphate	phosphoribosylaminoimidazole carboxylase ATPase subunit PurK	purK
7002_A0620	Amino acid metabolism	Histidine metabolism	histidine biosynthesis from ribose-5-phosphate	ATP phosphoribosyltransferase catalytic subunit HisG	hisG
7002_A0628	Translation	Transfer RNA biogenesis	tRNA aminoacylation	threonyl-tRNA synthetase ThrS	thrS
7002_A0655	Carbohydrate metabolism	Pyruvate metabolism	pyruvate dehydrogenase complex PdhABCD-AceE	pyruvate dehydrogenase E1 component beta subunit PdhB	pdhB
7002_A0674	Amino acid metabolism	Arginine and proline metabolism	arginine biosynthesis from ornithine_ carbamoyl-p_ and aspartate (urea cycle)	ornithine carbamoyltransferase ArgF	argF
7002_A0677	Amino acid metabolism	Phenylalanine_ tyrosine and tryptophan biosynthesis	tyrosine biosynthesis from prephanate	arogenate dehydrogenase (NADP+) TyrAa	tyrAa
7002_A0681	Amino acid metabolism	Phenylalanine_ tyrosine and tryptophan biosynthesis	tryptophan biosynthesis from ribose-5-phosphate	anthranilate synthase aminase component TrpE	trpE
7002_A0706	Carbohydrate metabolism	Inositol phosphate metabolism	myo-inositol degradation	inositol monophosphatase family protein
7002_A0710	Carbohydrate metabolism	Glyoxylate and dicarboxylate metabolism	photorespiration (oxidative C2 cycle)	glycolate oxidase FAD-binding subunit GlcE	glcE
7002_A0718	Fatty acid and lipid metabolism	Biosynthesis	digalactosyldiacylglycerol biosynthesis	digalactosyldiacylglycerol (DGDG) synthase DgdA	dgdA
7002_A0743	Terpenoids and polyketides metabolism	Terpenoid backbone biosynthesis	IPP biosynthesis via deoxyxylulose	(E)-4-hydroxy-3-methylbut-2-en-1-yl diphosphate synthase IspG	ispG
7002_A0773	Amino acid metabolism	Alanine_ aspartate and glutamate metabolism	glutamine biosynthesis	glutamate dehydrogenase (NADP+) GdhA	gdhA
7002_A0792	Regulatory functions	General	thiol redox pathways thioreoxin system	NADPH thioredoxin reductase TrxB	trxB
7002_A0814	Nucleic acid metabolism	Purine metabolism	adenosine monophosphate (AMP) biosynthesis from inosine monophosphate (IMP)	nucleoside-diphosphate kinase Ndk	ndk
7002_A0818	Terpenoids and polyketides metabolism	Terpenoid backbone biosynthesis	IPP biosynthesis via deoxyxylulose	1-deoxy-D-xylulose-5-phosphate reductoisomerase Dxr	dxr
7002_A0838	Carbohydrate metabolism	Citrate cycle (TCA cycle)	citrate cycle_ first carbon oxidation	NADP-dependent isocitrate dehydrogenase Icd	icd
7002_A0846	Translation	Ribosomal proteins: synthesis and modification	ribosome large subunit	LSU ribosomal protein L28 RpmB	rpmB
7002_A0847	Fatty acid and lipid metabolism	Glycerolipid and glycerophospholid metabolism	sulfolipid sulfoquinovosyldiacylglycerol biosynthesis	UDP-sulfoquinovose synthase SqdB	sqdB
7002_A0877	Fatty acid and lipid metabolism	Glycerolipid and glycerophospholid metabolism	phosphatidylglycerol biosynthesis	CDP-diacylglycerol--glycerol-3-phosphate 3-phosphatidyltransferase PgsA	pgsA
7002_A0878	Prosthetic groups_ cofactors_ and carriers	Nicotinate and nicotinamide metabolism	NAD(P) biosynthesis common pathway from nicotinic acid mononucleotide route 1	nicotinate-nucleotide adenylyltransferase NadD	nadD
7002_A0884	Nucleic acid metabolism	Pyrimidine metabolism	uridine monophosphate biosynthesis from glutamine	aspartate carbamoyltransferase catalytic subunit PyrB	pyrB
7002_A0889	Prosthetic groups_ cofactors_ and carriers	One carbon pool by folate	folic acid biosynthesis	bifunctional methylenetetrahydrofolate dehydrogenase (NADP+) / methenyltetrahydrofolate cyclohydrolase FolD	folD
7002_A0890	Carbohydrate metabolism	Citrate cycle (TCA cycle)	citrate cycle_ second carbon oxidation	succinyl-CoA ligase alpha subunit SucD	sucD
7002_A0891	Carbohydrate metabolism	Citrate cycle (TCA cycle)	citrate cycle_ second carbon oxidation	succinyl-CoA ligase beta subunit Succ	sucC
7002_A0923	Energy metabolism	Oxidative phosphorylation	NAD(P)H:quinone oxidoreductase (complex I) NdhABCDEFGHIJKLMNOPQS	NADH-plastoquinone oxidoreductase K subunit NdhE	ndhE
7002_A0953	Nucleic acid metabolism	Pyrimidine metabolism		uridylate kinase PyrH	pyrH
7002_A0955	Translation	Ribosomal proteins: synthesis and modification	ribosome small subunit	SSU ribosomal protein S1 RpsA	rpsA
7002_A0957	Energy metabolism	Photosynthesis	photosystem II other common subunits	photosystem II reaction center protein PsbT	psbT
7002_A0988	Translation	Ribosomal proteins: synthesis and modification	ribosome large subunit	LSU ribosomal protein L34 RpmH	rpmH
7002_A1000	Prosthetic groups_ cofactors_ and carriers	Porphyrin and chlorophyll metabolism	chlorophyllide a biosynthesis from protoporphyrin IX	Mg-protoporphyrin IX chelatase subunit H ChlH-like
7002_A1006	Prosthetic groups_ cofactors_ and carriers	One carbon pool by folate		formyltetrahydrofolate deformylase PurU	purU
7002_A1009	Energy metabolism	Photosynthesis	photosystem I other common subunits	photosystem I reaction centre subunit IX PsaJ	psaJ
7002_A1018	Prosthetic groups_ cofactors_ and carriers	Porphyrin and chlorophyll metabolism	chlorophyllide a biosynthesis from protoporphyrin IX	magnesium chelatase subunit BchH	bchH
7002_A1025	Translation	Aminoacyl-tRNA biosynthesis	GatABC aspartyl/glutamyl-tRNA(Asn/Gln) amidotransferase complex	bifunctional aspartyl-tRNA / glutamyl-tRNA amidotransferase subunit A GatA	gatA
7002_A1033	Translation	Ribosomal proteins: synthesis and modification	ribosome large subunit	LSU ribosomal protein L19 RplS	rplS
7002_A1085	Terpenoids and polyketides metabolism	Terpenoid backbone biosynthesis	C10-C20 isoprenoid biosynthesis	geranylgeranyl diphosphate synthase type II CrtE	crtE
7002_A1126	Carbohydrate metabolism	Pyruvate metabolism	pyruvate dehydrogenase complex PdhABCD-AceE	dihydrolipoamide dehydrogenase PdhD	pdhD
7002_A1143	Energy metabolism	Oxidative phosphorylation	NAD(P)H:quinone oxidoreductase (complex I) NdhABCDEFGHIJKLMNOPQS	NADH-plastoquinone oxidoreductase subunit NdhN	ndhN
7002_A1146	Amino acid metabolism	Phenylalanine_ tyrosine and tryptophan biosynthesis	chorismate biosynthesis via shikimate	3-dehydroquinate synthase AroB	aroB
7002_A1166	Terpenoids and polyketides metabolism	Terpenoid backbone biosynthesis	IPP biosynthesis via deoxyxylulose	2-C-methyl-D-erythritol 2_4-cyclodiphosphate synthase IspF	ispF
7002_A1172	Terpenoids and polyketides metabolism	Terpenoid backbone biosynthesis	IPP biosynthesis via deoxyxylulose	1-deoxy-D-xylulose-5-phosphate synthase Dxs	dxs
7002_A1192	Prosthetic groups_ cofactors_ and carriers	Porphyrin and chlorophyll metabolism	uroporhyrinogen III biosynthesis from 5-aminolevulinate	bifunctional uroporphyrin-III synthase / uroporphyrin-III methyltransferase HemD-CobA	hemD-cobA
7002_A1228	Energy metabolism	Oxidative phosphorylation	phosphate homeostasis	inorganic pyrophosphatase Ppa	ppa
7002_A1258	Energy metabolism	Photosynthesis	photosystem II other common subunits	photosystem II reaction center protein Psb28	psb28
7002_A1267	Amino acid metabolism	Lysine biosynthesis	lysine biosynthesis	aspartate kinase LysC	lysC
7002_A1269	Energy metabolism	Carbon fixation in prokaryotes	Calvin-Benson cycle and Pentose phosphate pathway	ribose 5-phosphate isomerase RpiA	rpiA
7002_A1275	Amino acid metabolism	Alanine_ aspartate and glutamate metabolism	aspartate semialdehyde biosynthesis from aspartate	aspartate-semialdehyde dehydrogenase Asd	asd
7002_A1278	Amino acid metabolism	Valine_ leucine and isoleucine metabolism	branched chain amino acid biosynthesis	ketol-acid reductoisomerase IlvC	ilvC
7002_A1302	Prosthetic groups_ cofactors_ and carriers	Porphyrin and chlorophyll metabolism	5-aminolevulinate biosynthesis (glutamate pathway)	glutamyl-tRNA reductase HemA	hemA
7002_A1303	Energy metabolism	Photosynthesis	photosystem II other common subunits	photosystem II oxygen-evolving enhancer protein 2 PsbP	psbP
7002_A1309	Nucleic acid metabolism	Pyrimidine metabolism		flavin-dependent thymidylate synthase ThyX	thyX
7002_A1312	Energy metabolism	Photosynthesis	photosystem II cyanobacterial subunits	photosystem II reaction center protein Psb28-2	psb28-2
7002_A1316	Nucleic acid metabolism	Pyrimidine metabolism	pyrimidine deoxyribonucleotide biosynthesis	dTMP kinase Tmk	tmk
7002_A1319	Energy metabolism	Nitrogen metabolism	urease	urease gamma subunit UreA	ureA
7002_A1344	Energy metabolism	Sulfur metabolism	assimilatory and dissimilatory sulfate reduction	sulfate adenylyltransferase Met3	met3
7002_A1347	Energy metabolism	Photosynthesis	photosystem II other common subunits	photosystem II protein PsbY	psbY
7002_A1348	Amino acid metabolism	Phenylalanine_ tyrosine and tryptophan biosynthesis	tryptophan biosynthesis from chorismate	indole-3-glycerol phosphate synthase TrpC	trpC
7002_A1350	Nucleic acid metabolism	Pyrimidine metabolism		ribonucleotide reductase alpha subunit NrdA	nrdA
7002_A1353	Amino acid metabolism	Valine_ leucine and isoleucine metabolism	leucine and isoleucine biosynthesis from pyruvate and acetyl-CoA	3-isopropylmalate/(R)-2-methylmalate dehydratase large subunit LeuC	leuC
7002_A1362	Nucleic acid metabolism	Purine metabolism	guanine ribonucleotide biosynthesis from IMP	glutamate hydrolyzing GMP synthase GuaA	guaA
7002_A1394	Translation	Transfer RNA biogenesis	tRNA aminoacylation	glutamyl-tRNA synthetase GltX	gltX
7002_A1401	Nucleic acid metabolism	Purine metabolism	polyphosphate kinase/exopolyphosphatase system	bifunctional exopolyphosphatase / guanosine-5'-triphosphate_3'-diphosphate pyrophosphatase Ppx-GppA	ppx-gppA
7002_A1406	Nucleic acid metabolism	Purine metabolism	purine (inosine-5'-phosphate) biosynthesis from ribose-5-phosphate	phosphoribosylamine--glycine ligase PurD	purD
7002_A1414	Carbohydrate metabolism	Pyruvate metabolism		phosphoenolpyruvate carboxylase PepC	pepC
7002_A1420	Nucleic acid metabolism	Pyrimidine metabolism	pyrimidine ribonucleotide biosynthesis from UMP	CTP synthase PyrG	pyrG
7002_A1427	Prosthetic groups_ cofactors_ and carriers	Pantothenate and CoA biosynthesis	coenzyme A biosynthesis from pantothenate	bifunctional phosphopantothenoylcysteine decarboxylase / phosphopantothenate--cysteine ligase CoaB-CoaC	coaB-coaC
7002_A1494	Energy metabolism	Sulfur metabolism	sulfate reduction to sulfide_ assimilatory	adenylylsulfate kinase CysC1	cysC1
7002_A1497	Energy metabolism	Sulfur metabolism	sulfate reduction to sulfide_ assimilatory	phosphoadenosine phosphosulfate reductase CysH	cysH
7002_A1498	Translation	Ribosomal proteins: synthesis and modification	ribosome large subunit	LSU ribosomal protien L9 RplI	rplI
7002_A1545	Nucleic acid metabolism	Purine metabolism	purine (inosine-5'-phosphate) biosynthesis from ribose-5-phosphate	phosphoribosylformylglycinamidine synthase glutamine amidotransferase subunit PurQ	purQ
7002_A1546	Nucleic acid metabolism	Purine metabolism	purine (inosine-5'-phosphate) biosynthesis from ribose-5-phosphate	phosphoribosylformylglycinamidine synthase subunit PurS	purS
7002_A1583	Carbohydrate metabolism	Glyoxylate and dicarboxylate metabolism	photorespiration (oxidative C2 cycle)	glycolate oxidase FeS subunit GlcF	glcF
7002_A1589	Energy metabolism	Photosynthesis	photosystem I main subunits	photosystem I iron-sulfur center subunit VII PsaC	psaC
7002_A1609	Translation	Transfer RNA biogenesis	tRNA aminoacylation	tyrosyl-tRNA synthetase TyrS	tyrS
7002_A1616	Amino acid metabolism	Valine_ leucine and isoleucine metabolism	branched chain amino acid biosynthesis	biosynthetic threonine dehydratase IlvA	ilvA
7002_A1627	Transport and binding proteins	Amino acids_ peptides and amines	high affinity urea uptake system UrtABCDE	ABC-type high affinity urea uptake system ATPase component UrtE	urtE
7002_A1636	Amino acid metabolism	Histidine metabolism	histidine biosynthesis from ribose-5-phosphate	imidazole glycerol phosphate synthase cyclase subunit HisF	hisF
7002_A1646	Amino acid metabolism	Cysteine and methionine metabolism	cysteine biosynthesis from serine	serine O-acetyltransferase CysE	cysE
7002_A1652	Prosthetic groups_ cofactors_ and carriers	Porphyrin and chlorophyll metabolism	light-independent protochlorophyllide reductase	light-independent protochlorophyllide reductase subunit ChlB	chlB
7002_A1656	Translation	Transfer RNA biogenesis	tRNA aminoacylation	prolyl-tRNA synthetase ProS	proS
7002_A1667	Nucleic acid metabolism	Purine metabolism	purine (inosine-5'-phosphate) biosynthesis from ribose-5-phosphate	phosphoribosylformylglycinamidine synthase PurL	purL
7002_A1672	Translation	Transfer RNA biogenesis	tRNA aminoacylation	alanyl-tRNA synthetase AlaS	alaS
7002_A1676	Fatty acid and lipid metabolism	Biosynthesis	fatty acid biosynthesis_ elongation	enoyl-[acyl-carrier protein] reductase I FabI	fabI
7002_A1683	Carbohydrate metabolism	Citrate cycle (TCA cycle)	citrate cycle_ first carbon oxidation	bifunctional aconitate hydratase 2/2-methylisocitrate dehydratase AcnB	acnB
7002_A1694	Translation	Transfer RNA biogenesis	tRNA aminoacylation	leucyl-tRNA synthetase LeuS	leuS
7002_A1714	Amino acid metabolism	Cysteine and methionine metabolism	methionine degradation	S-adenosylmethionine synthetase MetK	metK
7002_A1715	Carbohydrate metabolism	Galactose metabolism	Leloir pathway (galactose/glucose interconversion)	UDP-glucose 4-epimerase GalE	galE
7002_A1730	Amino acid metabolism	Phenylalanine_ tyrosine and tryptophan biosynthesis	chorismate biosynthesis via shikimate	shikimate dehydrogenase AroE	aroE
7002_A1759	Energy metabolism	Photosynthesis	photosystem II main subunits	photosystem II CP47 chlorophyll apoprotein PsbB	psbB
7002_A1782	Amino acid metabolism	Arginine and proline metabolism	proline biosynthesis from glutamate	glutamate 5-kinase ProB	proB
7002_A1796	Energy metabolism	Carbon fixation in prokaryotes	Calvin-Benson cycle	ribulose bisphosphate carboxylase small subunit RbcS	rbcS
7002_A1823	Translation	Ribosomal proteins: synthesis and modification	ribosome small subunit	SSU ribosomal protein S15 RpsO	rpsO
7002_A1825	Amino acid metabolism	Phenylalanine_ tyrosine and tryptophan biosynthesis	chorismate from erythrose-4P	3-deoxy-7-phosphoheptulonate synthase AroA2	aroA2
7002_A1829	Prosthetic groups_ cofactors_ and carriers	Pantothenate and CoA biosynthesis	pantothenate biosynthesis from aspartate and 2-oxoisovalerate	3-methyl-2-oxobutanoate hydroxymethyltransferase PanB	panB
7002_A1865	Carbohydrate metabolism	Starch and sucrose metabolism	glycogen biosynthesis	1_4-alpha-glucan branching enzyme GlgB	glgB
7002_A1890	Amino acid metabolism	Histidine metabolism	histidine biosynthesis from ribose-5-phosphate	phosphoribosylformimino-5-aminoimidazole carboxamide ribotide isomerase HisA	hisA
7002_A1893	Translation	Ribosomal proteins: synthesis and modification	ribosome large subunit	LSU ribosomal protein L32 RpmF	rpmF
7002_A1905	Terpenoids and polyketides metabolism	Terpenoid backbone biosynthesis	IPP biosynthesis via deoxyxylulose	2-C-methyl-D-erythritol 4-phosphate cytidylyltransferase IspD	ispD
7002_A1919	Amino acid metabolism	Arginine and proline metabolism	proline biosynthesis from glutamate	pyrroline-5-carboxylate reductase ProC	proC
7002_A1959	Translation	Ribosomal proteins: synthesis and modification	ribosome small subunit	SSU ribosomal protein S2 RpsB	rpsB
7002_A1961	Energy metabolism	Photosynthesis	photosystem I main subunits	photosystem I P700 chlorophyll a apoprotein A1 PsaA	psaA
7002_A1962	Energy metabolism	Photosynthesis	photosystem I main subunits	photosystem I P700 chlorophyll a apoprotein A2 PsaB	psaB
7002_A2015	Regulatory functions	Protein interactions		protein lysine acetyltransferase Pka	pka
7002_A2041	Carbohydrate metabolism	Citrate cycle (TCA cycle)	citrate cycle_ second carbon oxidation	fumarate hydratase class II FumC	fumC
7002_A2048	Translation	Ribosomal proteins: synthesis and modification	ribosome small subunit	SSU ribosomal protein S20 RspT	rpsT
7002_A2049	Amino acid metabolism	Histidine metabolism	histidine biosynthesis from ribose-5-phosphate	histidinol dehydrogenase HisD	hisD
7002_A2064	Translation	Ribosomal proteins: synthesis and modification	ribosome small subunit	SSU ribosomal protein S12 RpsL	rpsL
7002_A2083	Translation	Ribosomal proteins: synthesis and modification	ribosome small subunit	SSU ribosomal protein S4 RpsD	rpsD
7002_A2093	Carbohydrate metabolism	Citrate cycle (TCA cycle)	citrate cycle_ second carbon oxidation	NAD-dependent malate dehydrogenase Mdh	mdh
7002_A2102	Amino acid metabolism	Arginine and proline metabolism	ornithine biosynthesis from glutamate_ acetylated branch	N-acetyl-gamma-glutamyl-phosphate reductase ArgC	argC
7002_A2127	Fatty acid and lipid metabolism	Biosynthesis	acetyl-CoA carboxylase complex	acetyl-CoA carboxylase complex biotin carboxylase subunit AccC	accC
7002_A2131	Amino acid metabolism	Glycine_ serine and threonine metabolism	homoserine biosynthesis from aspartate	homoserine dehydrogenase ThrA	thrA
7002_A2147	Amino acid metabolism	Phenylalanine_ tyrosine and tryptophan biosynthesis	chorismate biosynthesis via shikimate	chorismate synthase AroC	aroC
7002_A2154	Carbohydrate metabolism	Glyoxylate and dicarboxylate metabolism	photorespiration (oxidative C2 cycle)	phosphoglycolate phosphatase Gph	gph
7002_A2180	Translation	Ribosomal proteins: synthesis and modification	ribosome large subunit	LSU ribosomal protein L20 RplT	rplT
7002_A2203	Amino acid metabolism	Phenylalanine_ tyrosine and tryptophan biosynthesis	tryptophan biosynthesis from ribose-5-phosphate	anthranilate phosphoribosyltransferase TrpD	trpD
7002_A2256	Prosthetic groups_ cofactors_ and carriers	Porphyrin and chlorophyll metabolism	chlorophyllide a biosynthesis from protoporphyrin IX	magnesium chelatase subunit BchI	bchI
7002_A2275	Translation	Transfer RNA biogenesis	tRNA aminoacylation	histidyl-tRNA synthetase HisS	hisS
7002_A2302	Prosthetic groups_ cofactors_ and carriers	Pantothenate and CoA biosynthesis	coenzyme A biosynthesis from pantothenate	type III pantothenate kinase CoaX	coaX
7002_A2328	Translation	Transfer RNA biogenesis	tRNA aminoacylation	seryl-tRNA synthetase SerS	serS
7002_A2345	Prosthetic groups_ cofactors_ and carriers	Porphyrin and chlorophyll metabolism	light-independent protochlorophyllide reductase	light-independent protochlorophyllide reductase subunit ChlN	chlN
7002_A2354	Amino acid metabolism	Valine_ leucine and isoleucine metabolism	leucine biosynthesis from pyruvate and acetyl-CoA	3-isopropylmalate dehydrogenase LeuB	leuB
7002_A2363	Translation	Ribosomal proteins: synthesis and modification	ribosome small subunit	SSU ribosomal protein S1 RpsA	rpsA
7002_A2367	Fatty acid and lipid metabolism	Biosynthesis of unsaturated fatty acids	fatty acid biosynthesis_ elongation	3-oxoacyl-[acyl-carrier-protein] reductase FabG	fabG
7002_A2404	Amino acid metabolism	Phenylalanine_ tyrosine and tryptophan biosynthesis	phenylalanine biosynthesis from chorismate	prephenate dehydratase PheA2	pheA2
7002_A2416	Terpenoids and polyketides metabolism	Terpenoid backbone biosynthesis	IPP biosynthesis via deoxyxylulose	4-diphosphocytidyl-2-C-methyl-D-erythritol kinase IspE	ispE
7002_A2424	Transport and binding proteins	Anions	sulfur assimilation	SulP family inorganic anion permease Sul1	sul1
7002_A2425	Nucleic acid metabolism	Purine metabolism	polyphosphate kinase/exopolyphosphatase system	polyphosphate kinase Ppk	ppk
7002_A2437	Energy metabolism	Nitrogen metabolism	urease	urease beta subunit UreB	ureB
7002_A2443	Fatty acid and lipid metabolism	Biosynthesis	acetyl-CoA carboxylase complex	acetyl-CoA carboxylase complex carboxyl transferase alpha subunit AccA	accA
7002_A2466	Amino acid metabolism	Cysteine and methionine metabolism	methionine biosynthesis from homoserine	B12-dependent 5-methyltetrahydrofolate--homocysteine methyltransferase MetH	metH
7002_A2474	Fatty acid and lipid metabolism	Biosynthesis	Sulfoquinovosyldiacylglycerol biosynthesis	sulfoquinovosyldiacylglycerol biosynthesis protein SqdX	sqdX
7002_A2476	Prosthetic groups_ cofactors_ and carriers	Porphyrin and chlorophyll metabolism	chlorophyll biosynthesis from chlorophyllide a	geranylgeranyl reductase ChlP	chlP
7002_A2479	Fatty acid and lipid metabolism	Glycerolipid and glycerophospholid metabolism	phosphatidylethanolamine biosynthesis	phosphatidate cytidylyltransferase CdsA	cdsA
7002_A2487	Amino acid metabolism	Arginine and proline metabolism	arginine biosynthesis from ornithine_ carbamoyl-p_ and aspartate (urea cycle)	argininosuccinate lyase ArgH	argH
7002_A2488	Nucleic acid metabolism	Pyrimidine metabolism	uridine monophosphate biosynthesis from glutamine	carbamoyl-phosphate synthase large subunit CarB	carB
7002_A2505	Nucleic acid metabolism	Pyrimidine metabolism	uridine monophosphate biosynthesis from glutamine	carbamoyl-phosphate synthase small subunit CarA	carA
7002_A2516	Amino acid metabolism	Arginine and proline metabolism	ornithine biosynthesis from glutamate_ acetylated branch	acetylglutamate kinase ArgB	argB
7002_A2517	Amino acid metabolism	Phenylalanine_ tyrosine and tryptophan biosynthesis	chorismate from erythrose-4P	shikimate kinase AroK	aroK
7002_A2527	Amino acid metabolism	Phenylalanine_ tyrosine and tryptophan biosynthesis	chorismate biosynthesis via shikimate	3-dehydroquinate dehydratase II AroQ	aroQ
7002_A2529	Amino acid metabolism	Histidine metabolism	histidine biosynthesis from ribose-5-phosphate	imidazole glycerol phosphate synthase glutamine amidotransferase subunit HisH	hisH
7002_A2530	Prosthetic groups_ cofactors_ and carriers	Pantothenate and CoA biosynthesis	pantothenate biosynthesis from aspartate and 2-oxoisovalerate	aspartate 1-decarboxylase PanD	panD
7002_A2533	Energy metabolism	Photosynthesis	photosystem II other common subunits	photosystem II reaction center protein Psb27	psb27
7002_A2536	Translation	Aminoacyl-tRNA biosynthesis	GatABC aspartyl/glutamyl-tRNA(Asn/Gln) amidotransferase complex	aspartyl-tRNA(Asn) / glutamyl-tRNA(Gln) amidotransferase subunit GatB	gatB
7002_A2537	Amino acid metabolism	Phenylalanine_ tyrosine and tryptophan biosynthesis	phenylalanine and tyrosine biosynthesis from chorismate	chorismate mutase II AroH	aroH
7002_A2541	Energy metabolism	Oxidative phosphorylation	NAD(P)H:quinone oxidoreductase (complex I) NdhABCDEFGHIJKLMNOPQS	NADH-plastoquinone oxidoreductasee subunit NdhH	ndhH
7002_A2547	Energy metabolism	Oxidative phosphorylation	NAD(P)H:quinone oxidoreductase (complex I) NdhABCDEFGHIJKLMNOPQS	NADH-plastoquinone oxidoreductase subunit NdhB	ndhB
7002_A2621	Energy metabolism	Photosynthesis	photosystem I other common subunits	photosystem I reaction center subunit VIII PsaI	psaI
7002_A2623	Carbohydrate metabolism	Citrate cycle (TCA cycle)	citrate cycle_ first carbon oxidation	citrate synthase GltA	gltA
7002_A2629	Energy metabolism	Sulfur metabolism	sulfate reduction to sulfide_ assimilatory	ferredoxin-sulfite reductase Sir	sir
7002_A2697	Energy metabolism	Carbon fixation in prokaryotes	Calvin-Benson cycle and Embden-Meyerhof pathway	glyceraldehyde 3-phosphate dehydrogenase GapA	gapA
7002_A2704	Regulatory functions	Protein interactions	branched chain amino acid biosynthesis	acetolactate synthase regulatory subunit IlvH	ilvH
7002_A2706	Translation	Transfer RNA biogenesis	tRNA aminoacylation	methionyl-tRNA synthetase MetG	metG
7002_A2726	Nucleic acid metabolism	Pyrimidine metabolism	pyrimidine (uridine-5'-phosphate) de novo biosynthesis	ribose-phosphate pyrophosphokinase PrsA	prsA
7002_A2748	Energy metabolism	Oxidative phosphorylation	NAD(P)H:quinone oxidoreductase (complex I) NdhABCDEFGHIJKLMNOPQS	NADH-plastoquinone oxidoreductasee subunit NdhC	ndhC
7002_A2756	Fatty acid and lipid metabolism	Biosynthesis of unsaturated fatty acids	alkene biosynthesis (1-nonadecene and 1_14-nonadecadiene)	delta 12 acyl-lipid desaturase DesA	desA
7002_A2774	Amino acid metabolism	Alanine_ aspartate and glutamate metabolism	alanine biosynthesis	alanine dehydrogenase Ald	ald
7002_A2797	Amino acid metabolism	Valine_ leucine and isoleucine metabolism	branched chain amino acid biosynthesis	acetolactate synthase catalytic subunit IlvB	ilvB
7002_A2806	Amino acid metabolism	Arginine and proline metabolism	arginine biosynthesis from ornithine_ carbamoyl-p_ and aspartate (urea cycle)	argininosuccinate synthase ArgG	argG
7002_A2853	Fatty acid and lipid metabolism	Glycerolipid and glycerophospholid metabolism	phosphatidylglycerol biosynthesis	glycerol-3-phosphate dehydrogenase (NAD(P)+) GpsA	gpsA
7002_A2854	Amino acid metabolism	Phenylalanine_ tyrosine and tryptophan biosynthesis	tryptophan biosynthesis from chorismate	phosphoribosylanthranilate isomerase TrpF	trpF
7002_G0014	Transport and binding proteins	Unknown substrate	osmolyte or protein uptake?	ABC-type nitrate/sulfonate/bicarbonate uptake system ATPase component
7002_G0015	Transport and binding proteins	Unknown substrate	osmolyte or protein uptake?	ABC-type nitrate/sulfonate/bicarbonate uptake system substrate-binding component
7002_G0016	Transport and binding proteins	Unknown substrate	osmolyte or protein uptake?	ABC-type nitrate/sulfonate/bicarbonate uptake system permease component
